# Supplementary material for: TESTING TECHNIQUES USED IN THE QUALITY SELECTION OF RCA 6810 MULTIPLIER PHOTOTUBES
Source: Royal Society of Chemistry journal article supplement (doi:10.1039/d2np00034b), 1956-10-16
Supplement: d2np00034b1.pdf [file d2np00034b1.pdf]

## Electronic Supplementary Information

for

### **[2 + 2]-Cycloaddition-derived cyclobutane natural products: structural diversity, sources, bioactivities, and biomimetic syntheses**

Pei-Yuan Yang, Qi Jia, Shao-Jiang Song\*, Xiao-Xiao Huang\*

*Key Laboratory of Computational Chemistry-Based Natural Antitumor Drug Research & Development, Liaoning Province; Engineering Research Center of Natural Medicine Active Molecule Research & Development, Liaoning Province; Key Laboratory of Natural Bioactive Compounds Discovery & Modification, Shenyang; School of Traditional Chinese Materia Medica, Shenyang Pharmaceutical University, Shenyang, Liaoning 110016, China*

The Supporting Information is a supplementary data for **section 2** to illustrate the structure, occurrence and bioactivities of [2 + 2]-cycloaddition-derived cyclobutane natural products up to December 2021 and for **section 3** to illustrate the optical rotation of [2 + 2]-cycloaddition-derived cyclobutane natural products.

## Contents

### 1. Structure list of [2 + 2]-cycloaddition-derived cyclobutane natural products

**Table S1** The structure, occurrence and optical rotation of [2 + 2]-cycloaddition-derived cyclobutane natural products.

### 2. Biological activities

**Table S2** Cytotoxicity of [2 + 2]-cycloaddition-derived cyclobutane natural products reported during the covered period.

**Table S3** Anti-inflammatory activity of [2 + 2]-cycloaddition-derived cyclobutane natural products reported during the covered period.

**Table S4** Neuroprotective activity of [2 + 2]-cycloaddition-derived cyclobutane natural products reported during the covered period.

**Table S5** Antifungal and antibacterial activity of [2 + 2]-cycloaddition-derived cyclobutane natural products reported during the covered period.

**Table S6** Antiplatelet aggregation activity of [2 + 2]-cycloaddition-derived cyclobutane natural products reported during the covered period.

**Table S7** Inhibitory effects on PTP1B of [2 + 2]-cycloaddition-derived cyclobutane natural products reported during the covered period.

**Table S8** Other activities of [2 + 2]-cycloaddition-derived cyclobutane natural products reported during the covered period.

### 3. References

# 1. Structure list of [2 + 2]-cycloaddition-derived cyclobutane natural products

## Piperidine/pyrrolidine alkaloid [2+2] dimers

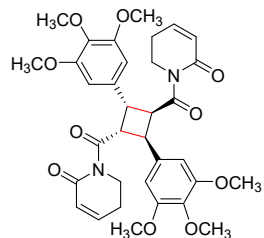

**piplartine-dimer A, 1**

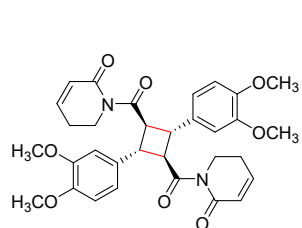

**( $\alpha$ ,  $\beta$ ,  $\alpha$ ,  $\beta$ )-1, 3-bis(3,4-dimethoxyphenyl)-2,4-bis[1-(2-carbonyl-5,6-dihydropyridine)-formyl]-cyclobutane, 2**

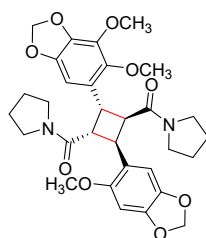

**3**

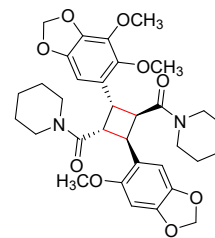

**cyclobutane-2-(1, 3-benzodioxol-5-methoxy-6-yl)-4-(1, 3-benzodioxol-4, 5-dimethoxy-6-yl)-1, 3-dicarboxapiperidine, 4**

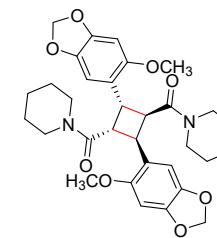

**cyclobutane-2, 4-bis-(1, 3-benzodioxol-5-methoxy-6-yl)-1, 3-dicarboxapiperidine, 5**

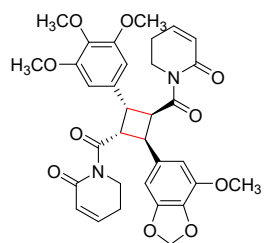

**piperarborenine, 6**

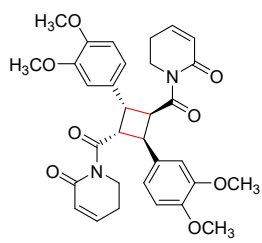

**piperarborenine A, 7**

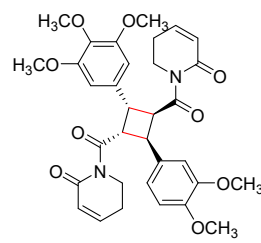

**piperarborenine B, 8**

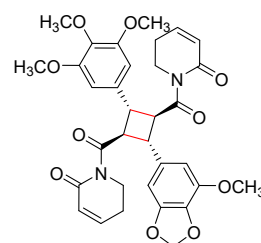

**piperarborenine C, 9**

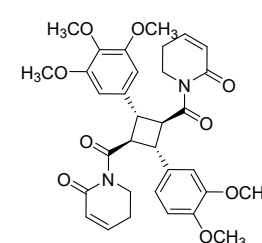

**piperarborenine D, 10# (original)**

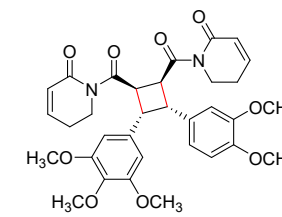

**piperarborenine D, 10 (revised)**

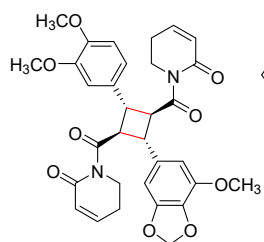

**piperarborenine E, 11**

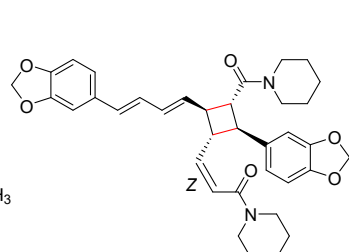

**pipericyclobutanamide B, 12**

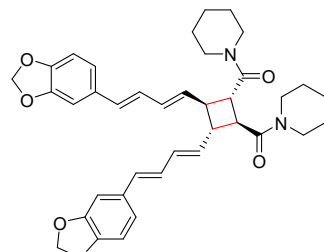

**pipericyclobutanamide C, 13**

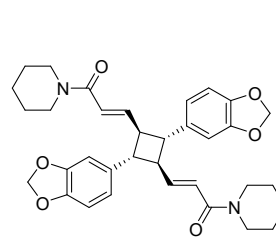

**dipiperamide A, 14# (proposed)**

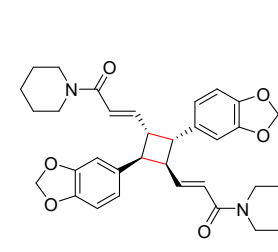

**dipiperamide A, 14 (revised) dipiperamide B (proposed)**

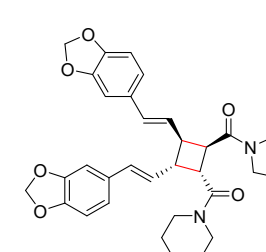

**dipiperamide C, 15**

Piperidine/pyrrolidine alkaloid [2+2] dimers (continued)

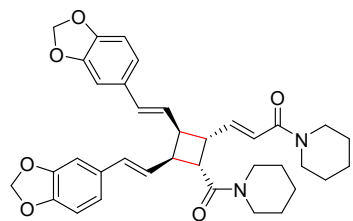

dipiperamide D, 16

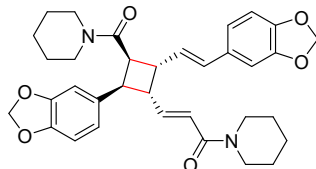

dipiperamide E, 17

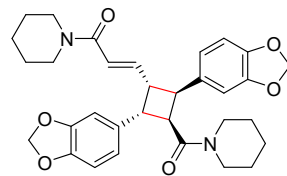

nigramide P, 18

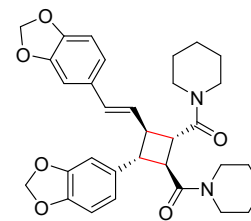

nigramide Q, 19

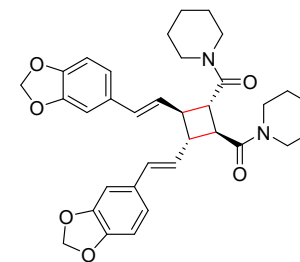

nigramide R, 20

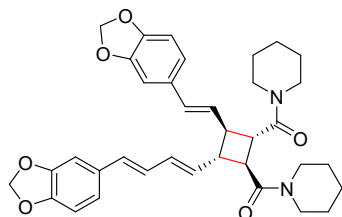

nigramide S, 21

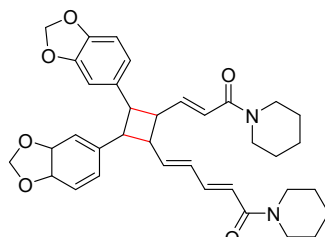

pipernigramide E, 22

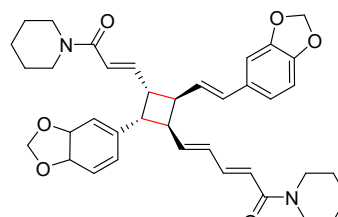

pipernigramide F, 23

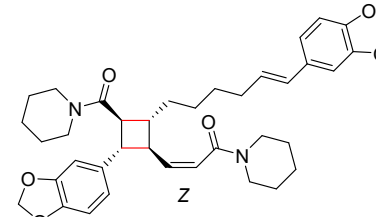

piperchabamide H, 24

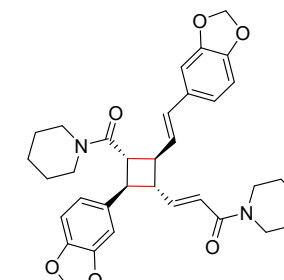

dipiperamides F, 25

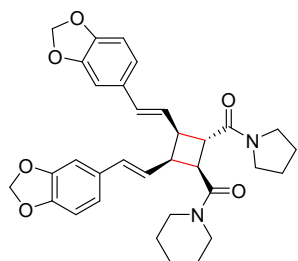

dipiperamides G, 26

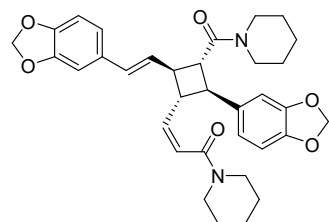

Pipercyclobutanamide A  
(proposed)

revised

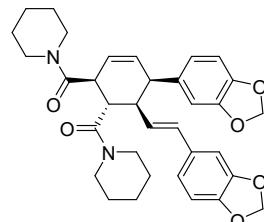

Chabamide

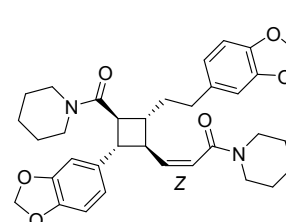

Piperchabamide G  
(proposed)

revised

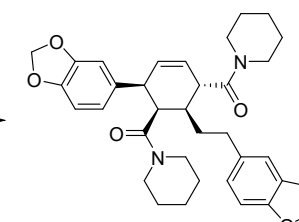

Nigramide F

Amide alkaloids [2+2] dimers

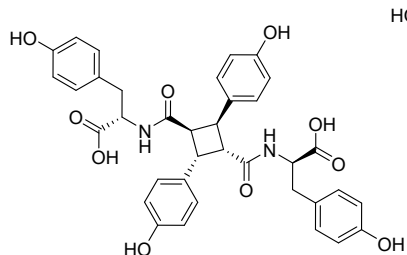

abrusamide A, 27#  
(proposed)

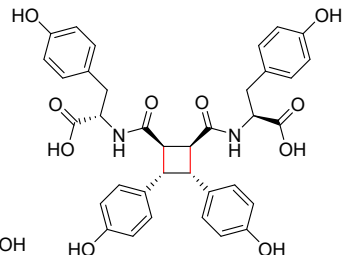

abrusamide A, 27  
(revised)

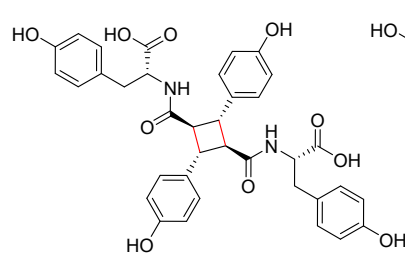

abrusamide B, 28

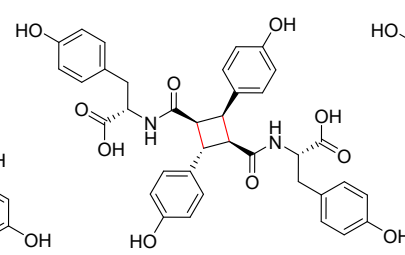

abrusamide C, 29

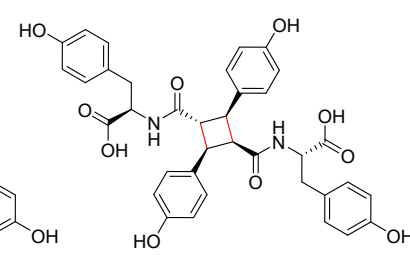

abrusamide D, 30

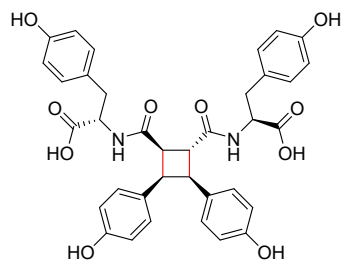

abrusamide E, 31

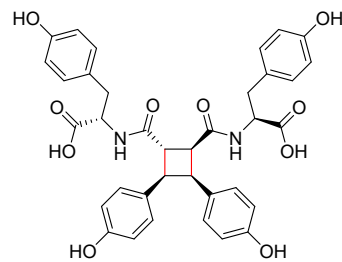

abrusamide F, 32

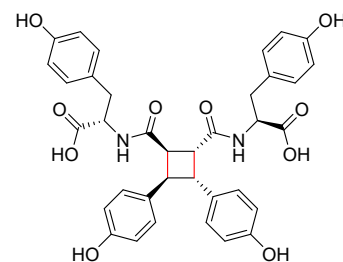

abrusamide G, 33

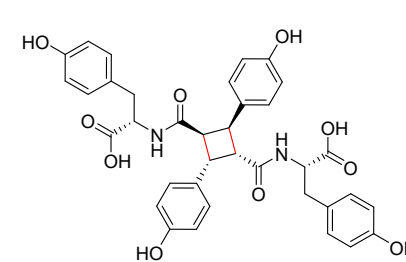

abrusamide H, 34

Tropane alkaloid [2+2] dimers

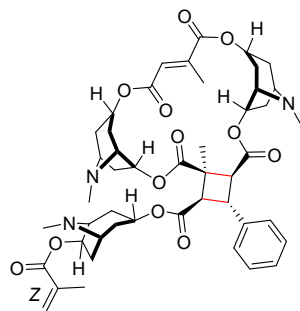

grahamine, 35

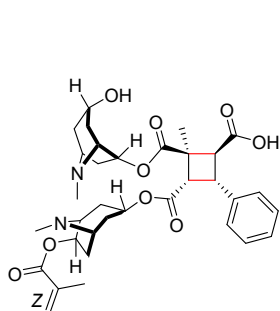

grahamine A, 36

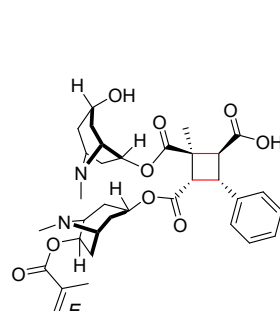

grahamine B, 37

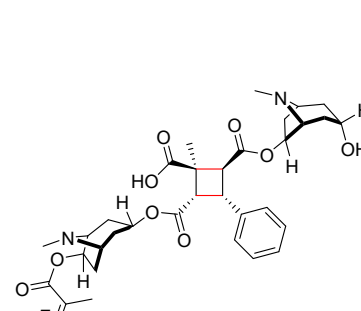

grahamine C, 38

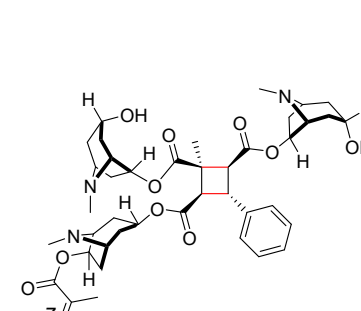

grahamine D, 39

Tropane alkaloid [2+2] dimers (continued)

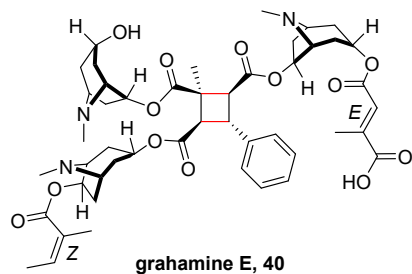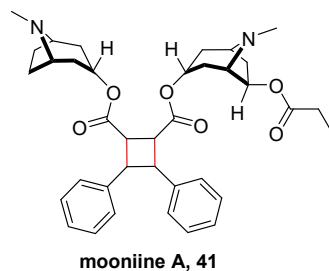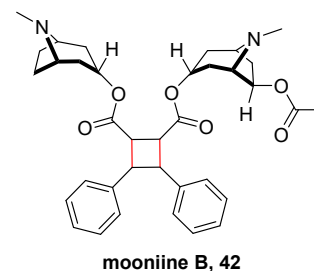

Indole alkaloid [2+2] dimers

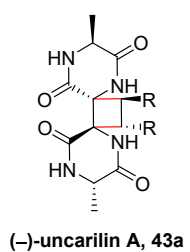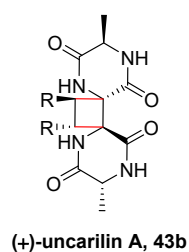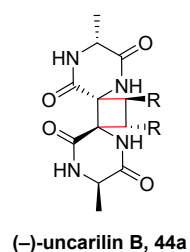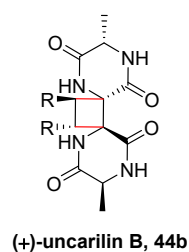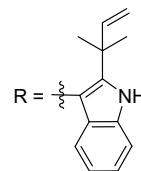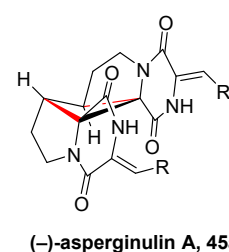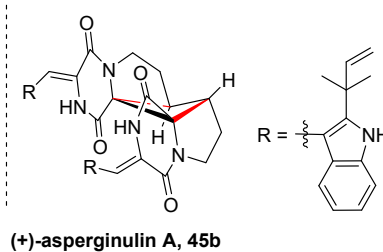

Indole alkaloid [2+2] dimers (continued)

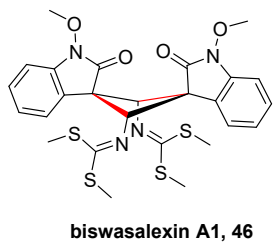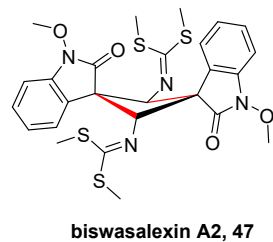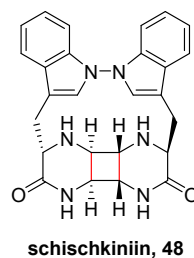

Guanidine alkaloid [2+2] dimers

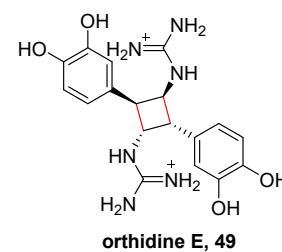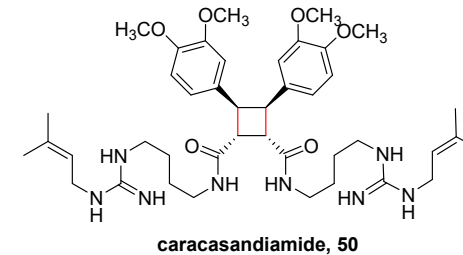

Indolizidine alkaloid [2+2] dimer

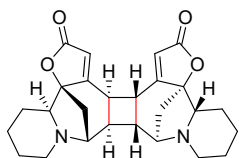

flueggidine, 51

$\beta$ -Carboline alkaloid [2+2] dimers

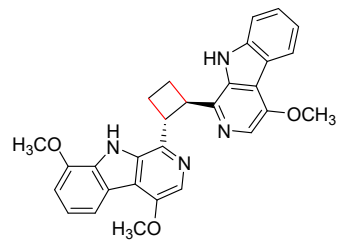

quassidine A, 52

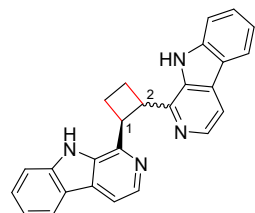

orthoscuticelline A, 53 *cis*-1,2  
orthoscuticelline B, 54 *trans*-1,2

Isoquinoline alkaloid [2+2] dimers

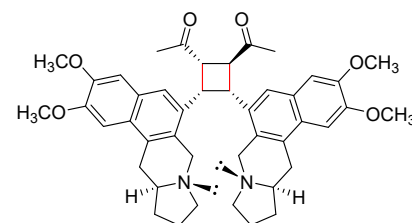

(+)-tengerensine, 55a

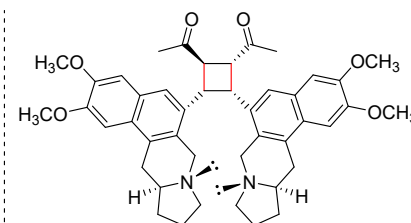

(-)-tengerensine, 55b

Brominated pyrrole-imidazole alkaloids [2+2] dimers

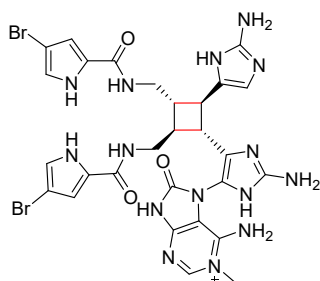

15'-oxoadenosceptrin, 56

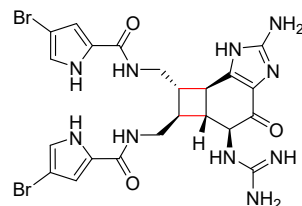

hexazosceptrin, 57

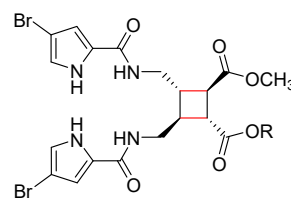

ageleste A, 58 R = H  
ageleste B, 59 R = CH<sub>3</sub>

Flavone [2 + 2] dimers

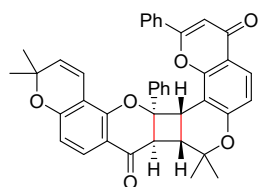

(-)-millpuline A, 60a

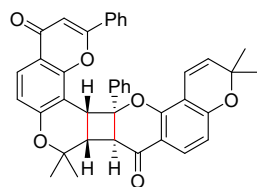

(+)-millpuline A, 60b

**Chalcone head-to-head [2+2] dimers**

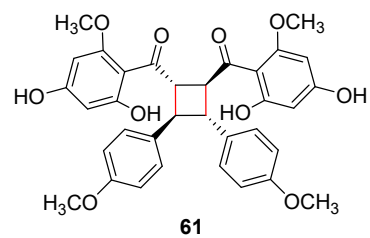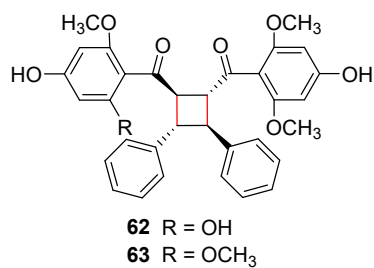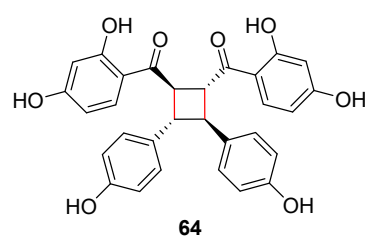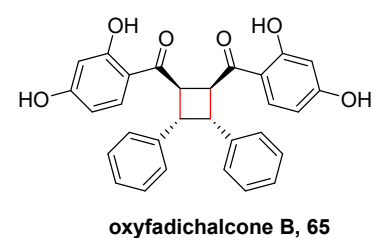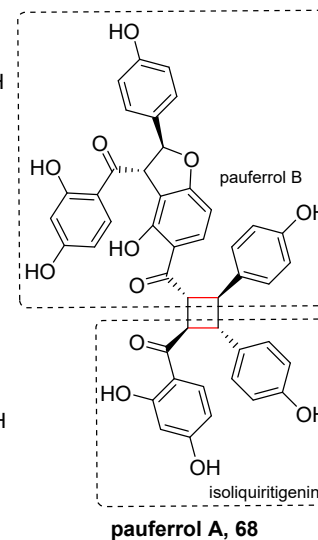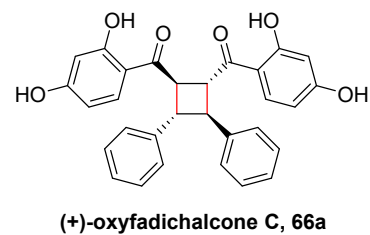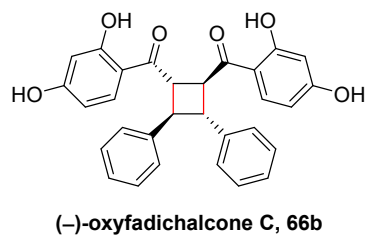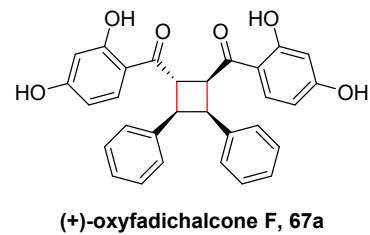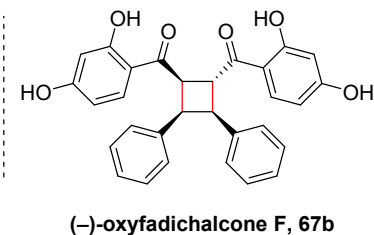

**Chalcone head-to-tail [2+2] dimers**

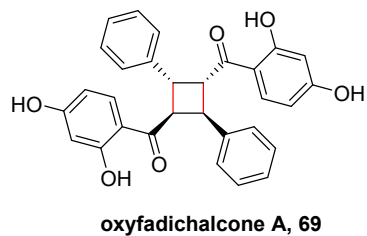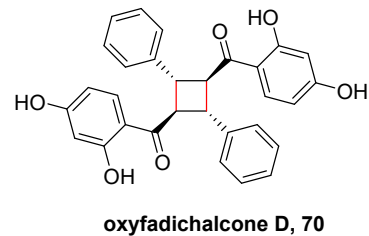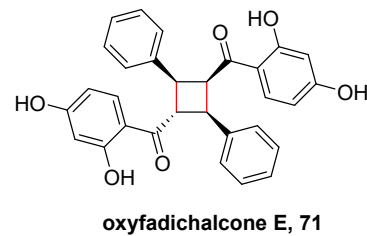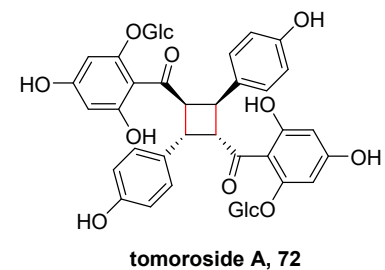



**Guaiane [2+2] dimers**

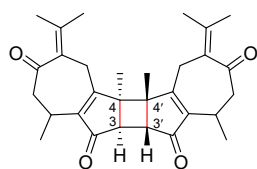

**vielanin B, 73**

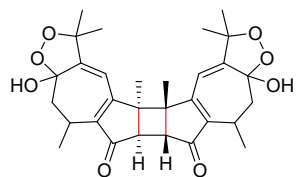

**vielanin C, 74**

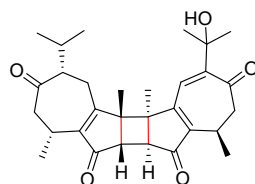

**vielaninor Q, 75**

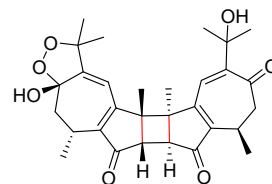

**vielaninor R, 76**

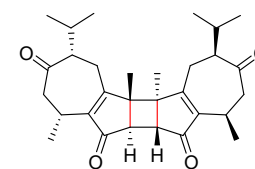

**xylopidimer D, 77**

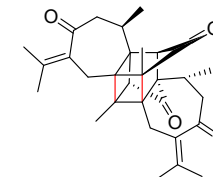

**xylopiana A, 78**

**Guaiane [2+2] dimers (continued)**

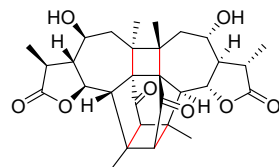

**artelein, 79**

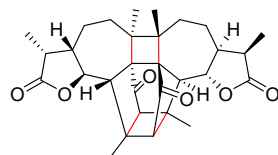

**artesin A, 80**

**Eremophilane [2+2] dimer**

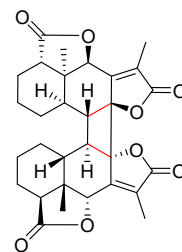

**bilighodgsonolide, 81**

**Lindenane [2+2] dimers**

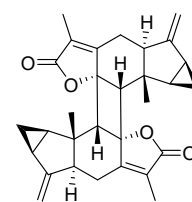

**chloranthalactone F, 82#  
(proposed)**

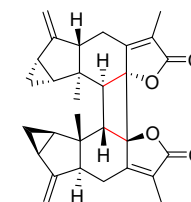

**chloranthalactone F, 82  
(revised)**

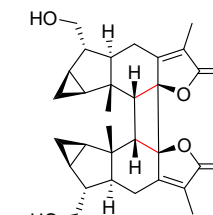

**chololactone H, 83**

**Lindenane & Guaiane [2+2] hetero-dimers**

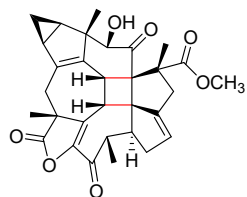

**chlorahupetone A, 84**

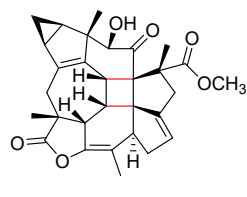

**chlorahupetone B, 85**

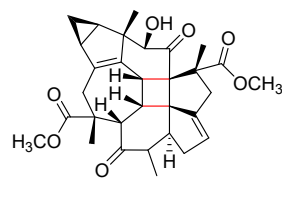

**chlorahupetone C, 86**

**Lindenane [2+2] dimers (continued)**

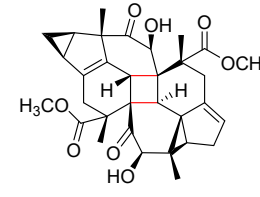

**chlorahupetone D, 87**

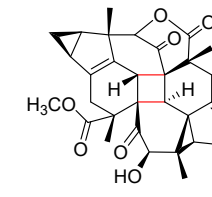

**chlorahupetone E, 88**

**C<sub>14</sub> pterisin [2+2] dimers**

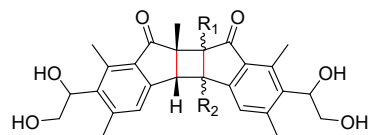

**bimutipterosin A, 89**  $R_1 = \alpha\text{CH}_3$   $R_2 = \alpha\text{H}$   
**bimutipterosin B, 90**  $R_1 = \beta\text{CH}_3$   $R_2 = \beta\text{H}$

**Guaiane & Eudesmane [2+2] hetero-dimers**

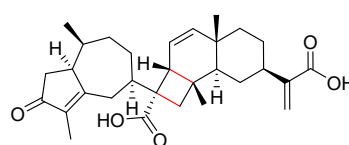

**artepestrin A, 91**

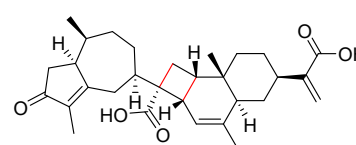

**artepestrin B, 92**

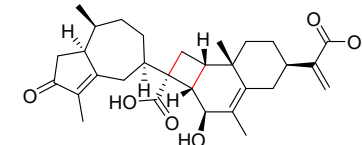

**artepestrin C, 93**

**Diterpenoid [2 + 2] dimers**

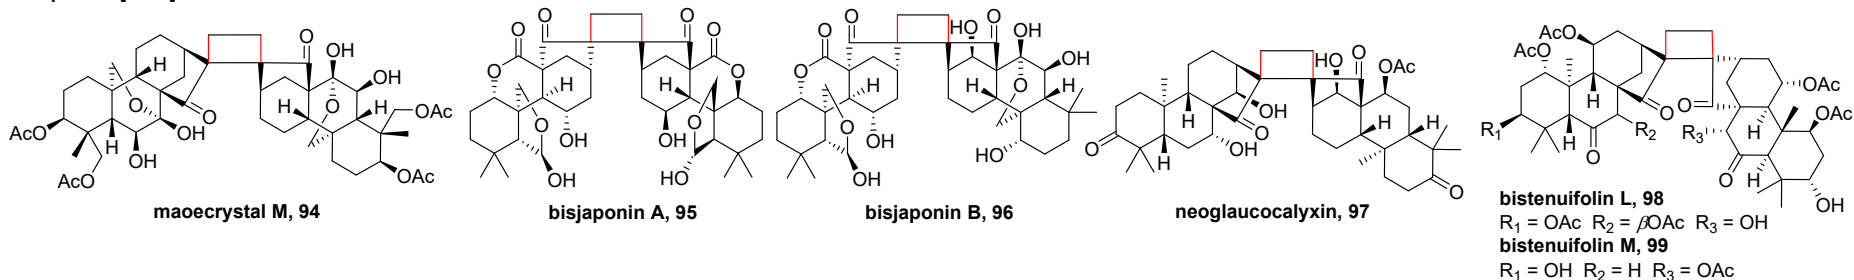

**Diterpenoid [2 + 2] dimers (continued)**

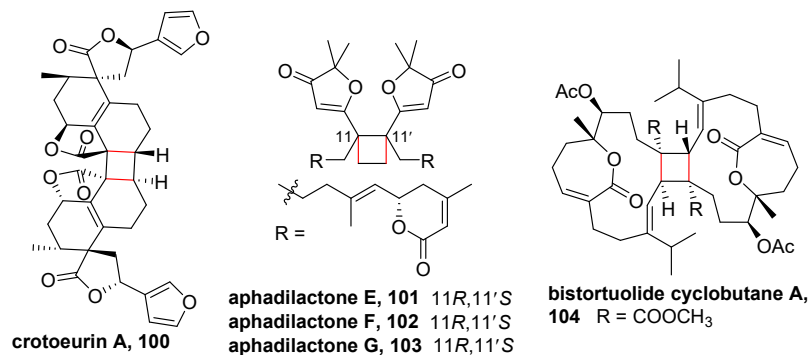

**Meroterpenoid [2+2] homo-dimers**

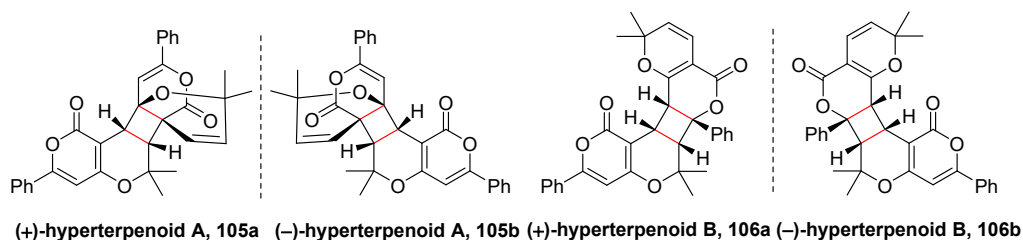

**Meroterpenoid [2+2] hetero-dimers**

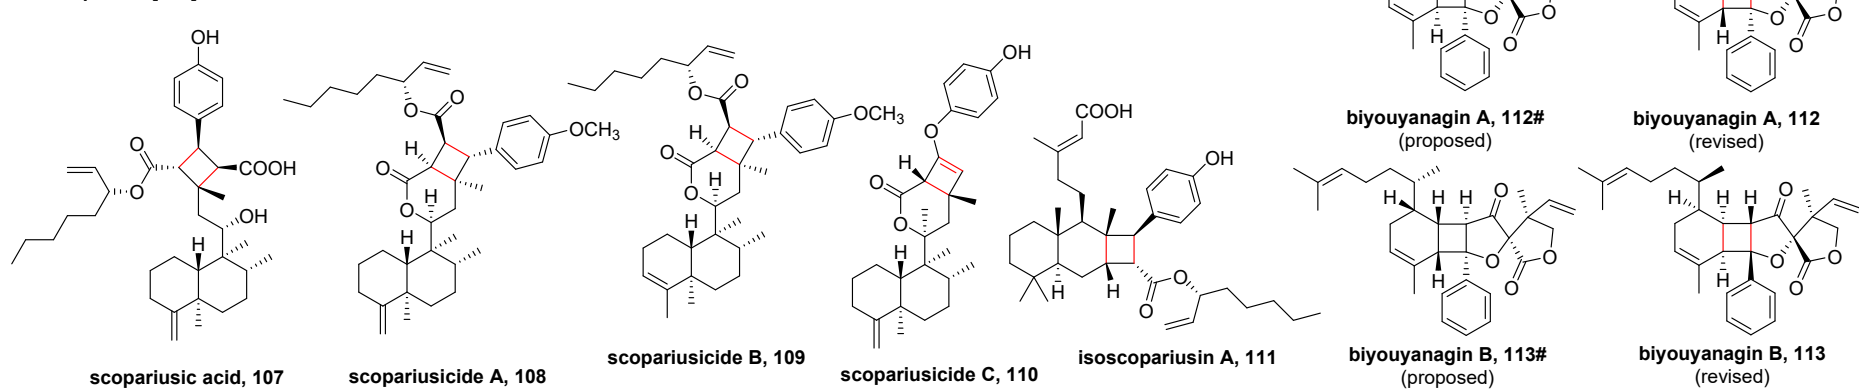

**Coumarin [2+2] dimers**

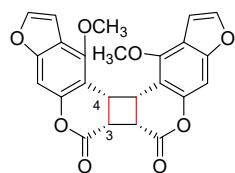

**bergapten dimer, 114**

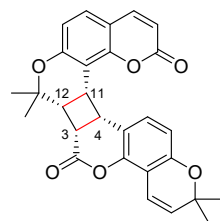

**diseselin A, 115**

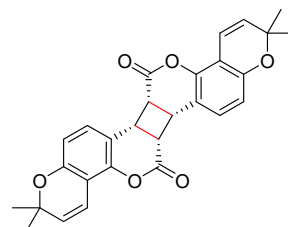

**diseselin B, 116**

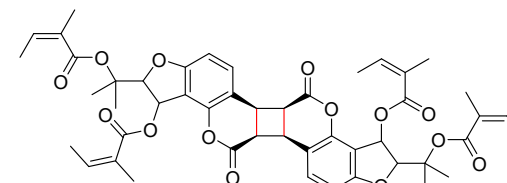

**diarchangelicin A, 117**

**Cyclobutane-lignans**

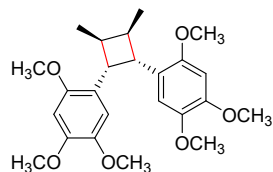

**heterotropin, 118**

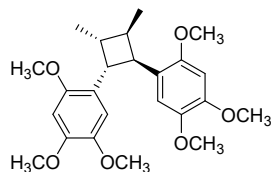

**magnosalin, 119#  
(proposed)**

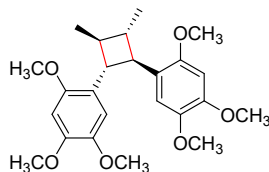

**magnosalin, 119  
(revised)**

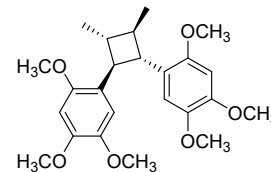

**andamanicin, 120#  
(proposed)**

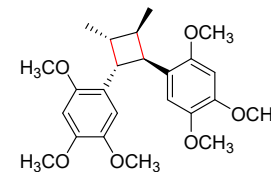

**andamanicin, 120  
(revised)**

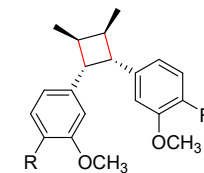

**cinbalansan, 121 R = OCH<sub>3</sub>  
endiandrin B, 123 R = OH**

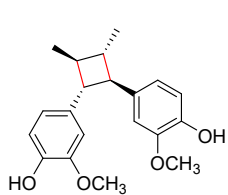

**endiandrin A, 122**

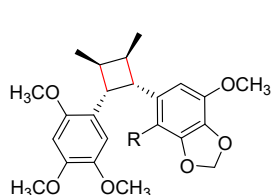

**moslolignan A, 124 R = H  
moslolignan B, 125 R = OCH<sub>3</sub>**

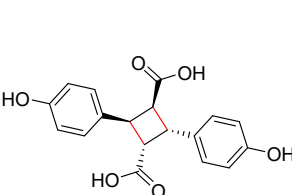

**4,4'-dihydroxytruxillic acid, 126**

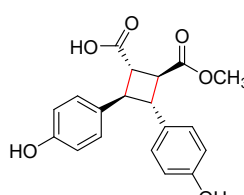

**anisumic acid, 127**

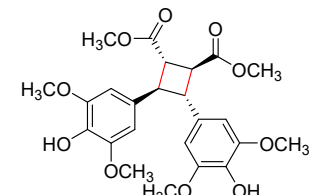

**(+)-isatisycloneolignan A, 128a**

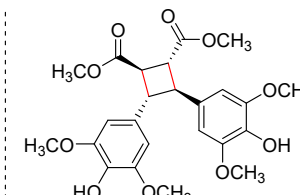

**(-)-isatisycloneolignan A, 128b**

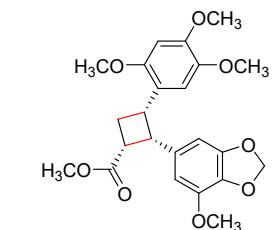

**methyl *rel*-(1*R*,2*S*,3*S*)-2-(7-methoxy-1,3-benzodioxol-5-yl)-3-(2,4,5-trimethoxyphenyl)cyclobutanecarboxylate, 129**

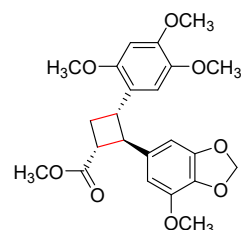

**methyl *rel*-(1*R*,2*R*,3*S*)-2-(7-methoxy-1,3-benzodioxol-5-yl)-3-(2,4,5-trimethoxyphenyl)cyclobutanecarboxylate, 130**

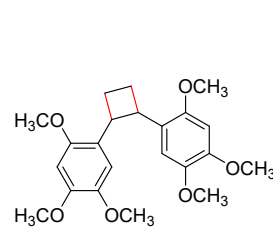

**pachyphyllin, 131**

**Coumarinolignan heter-dimers**

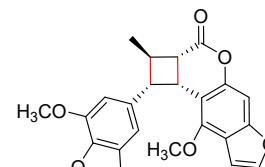

**lindleyanin, 132**

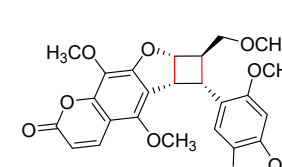

**melicodin C, 133**

Phenylpropionic acid [2+2] dimers

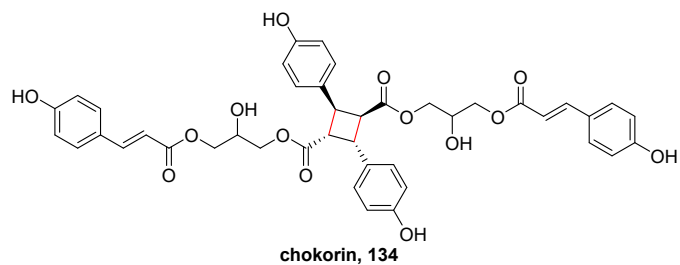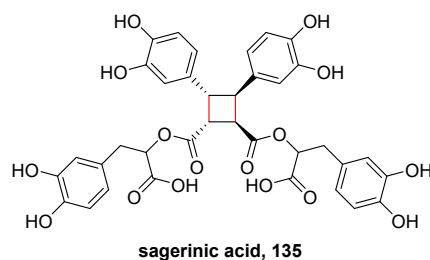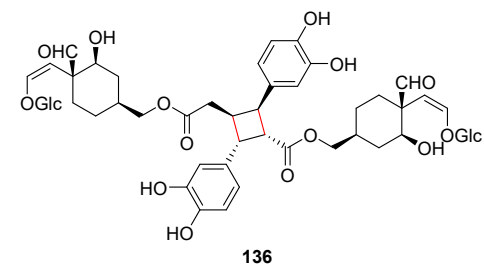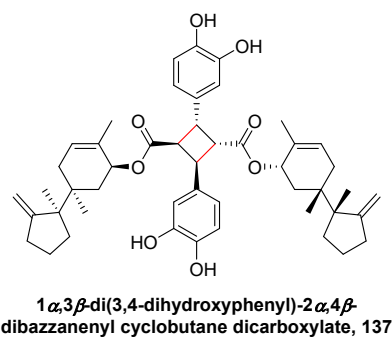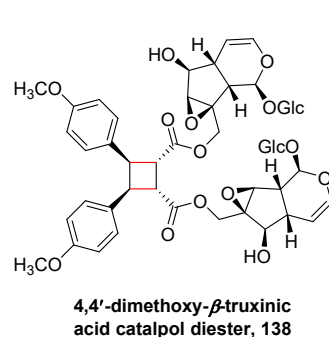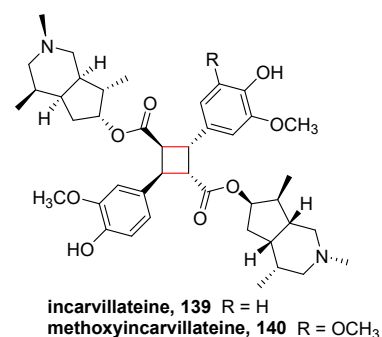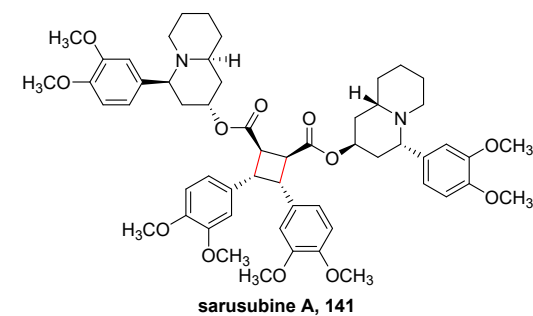

Phenylpropanoid glucoside [2+2] dimers

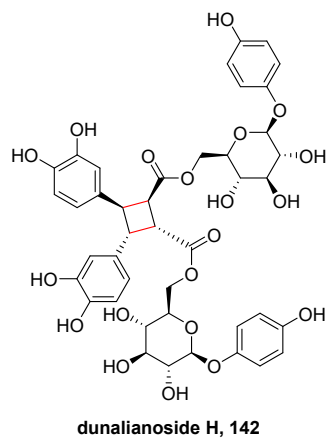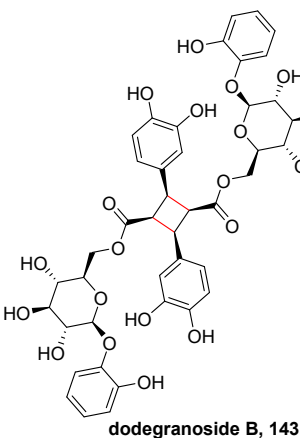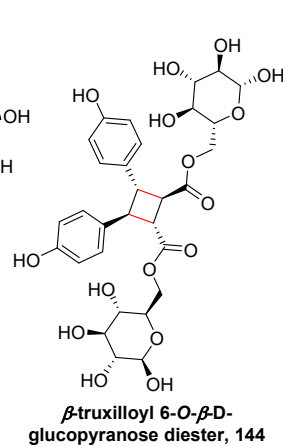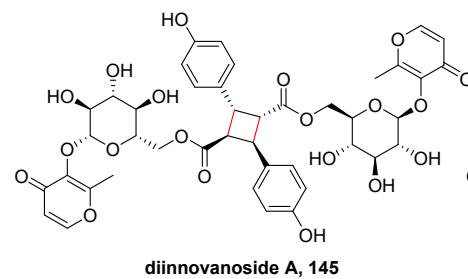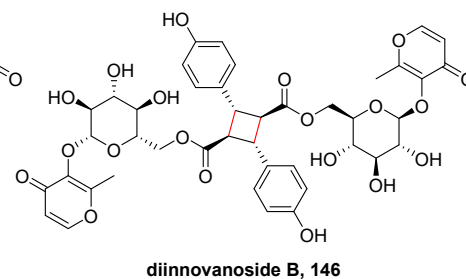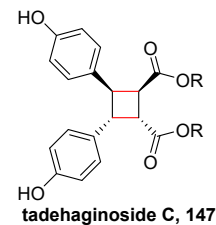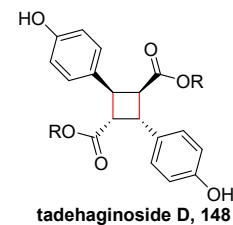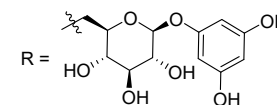

**Flavonoid glucoside cyclodimers**

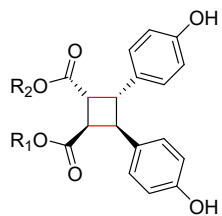

**stachysetin, 149**  $R_1 = R_2 = A$   
**palhinoside C, 165**  $R_1 = K$   $R_2 = A$   
**palhinoside E, 167**  $R_1 = A$   $R_2 = CH_3$   
**palhinoside G, 169**  $R_1 = K$   $R_2 = CH_3$   
**palhinoside H, 170**  $R_1 = R_2 = K$

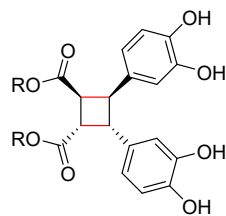

**monochaetin, 150**  $R = B$

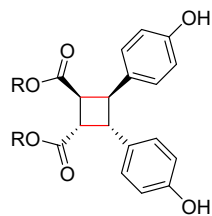

**potentilin A, 151**  $R = D$   
**biginkgoside C, 155**  $R = F$

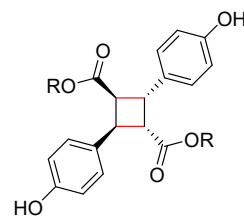

**geniculatin, 152**  $R = E$

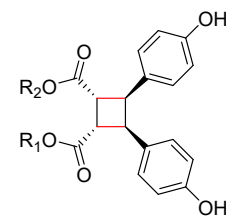

**biginkgoside A, 153**  $R_1 = R_2 = F$   
**biginkgoside B, 154**  $R_1 = R_2 = G$   
**palhinoside A, 163**  $R_1 = R_2 = A$   
**palhinoside B, 164**  $R_1 = K$   $R_2 = A$   
**palhinoside D, 166**  $R_1 = A$   $R_2 = CH_3$   
**palhinoside F, 168**  $R_1 = K$   $R_2 = CH_3$

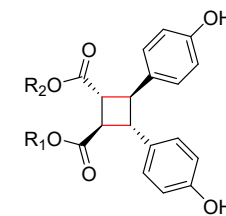

**biginkgoside D, 156**  $R_1 = R_2 = F$   
**biginkgoside E, 157**  $R_1 = R_2 = G$   
**biginkgoside F, 158**  $R_1 = G$   $R_2 = F$   
**cinnamomoside A, 162**  $R_1 = CH_3$   $R_2 =$

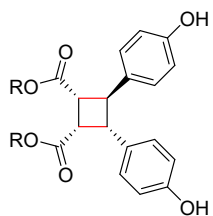

**biginkgoside G, 159**  $R = F$

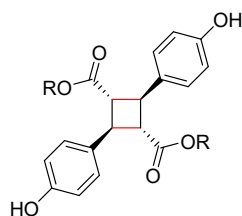

**biginkgoside H, 160**  $R = F$   
**biginkgoside I, 161**  $R = G$

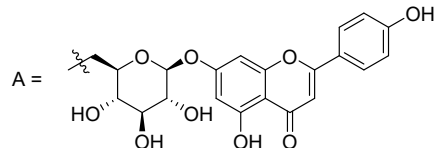

A = apigenin 7-O- $\beta$ -D-Glc

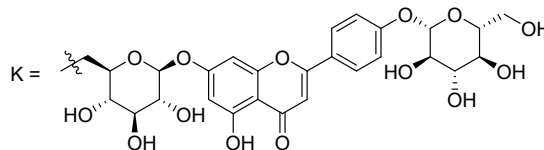

K = apigenin 7,4'-di-O- $\beta$ -D-Glc

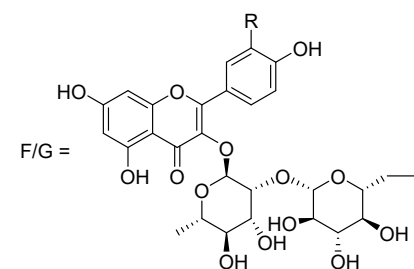

F = kaempferol 3-O- $\beta$ -D-Glc(1 $\rightarrow$ 2)- $\alpha$ -L-Rha  $R = H$   
G = quercetin 3-O- $\beta$ -D-Glc(1 $\rightarrow$ 2)- $\alpha$ -L-Rha  $R = OH$

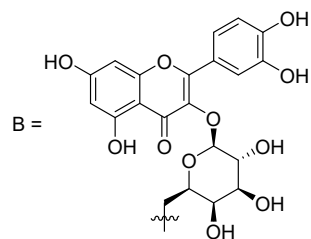

B = quercetin 3-O- $\beta$ -D-Gal

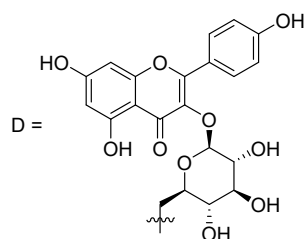

D = kaempferol 3-O- $\beta$ -D-Glc

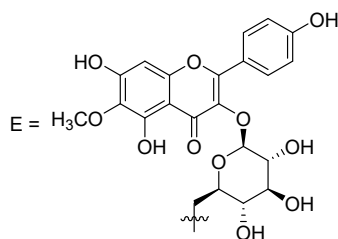

E = 6-methoxykaempferol 3-O- $\beta$ -D-Glc

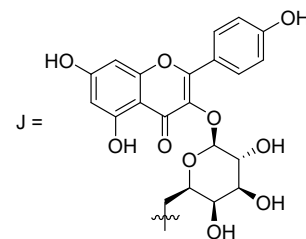

J = kaempferol 3-O- $\beta$ -D-Gal

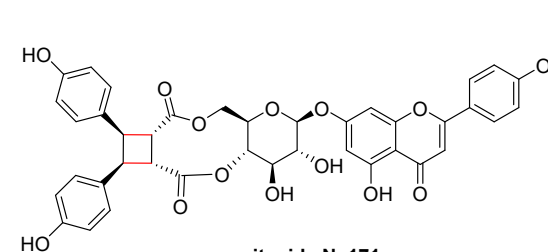

**itoside N, 171**

**Kavalactone [2+2] dimers**

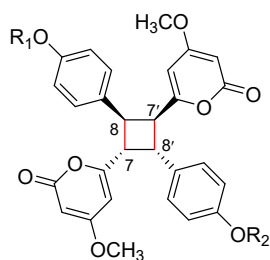

**achyrodimer A, 172**  $R_1 = H$   $R_2 = H$   
**achyrodimer B, 173**  $R_1 = Glc$   $R_2 = H$   
**achyrodimer C, 174**  $R_1 = Glc$   $R_2 = Glc$   
**velutinindimer A, 180**  $R_1 = CH_3$   $R_2 = CH_3$

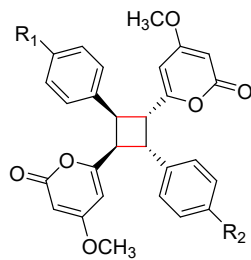

**diyangonin A, 175**  $R_1 = OCH_3$   $R_2 = OCH_3$   
**diyangonin B, 176**  $R_1 = OCH_3$   $R_2 = H$   
**178**  $R_1 = H$   $R_2 = H$

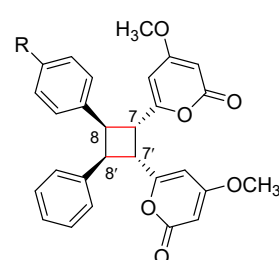

**diyangonin C, 177**  $R = OCH_3$   
**179**  $R = H$

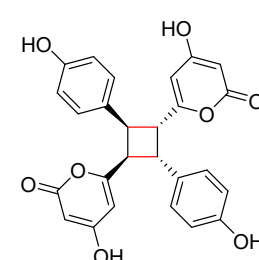

**achyrodimer F, 181**

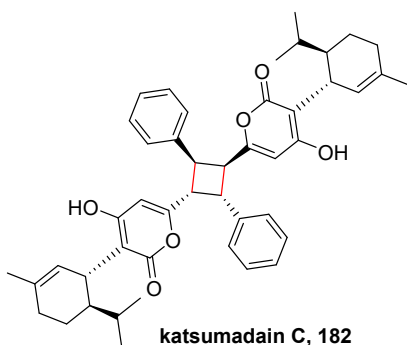

**katsumadain C, 182**

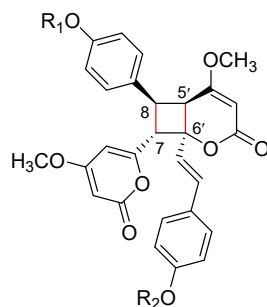

**achyrodimer D, 183**  $R_1 = H$   $R_2 = H$   
**achyrodimer E, 184**  $R_1 = Glc$   $R_2 = Glc$

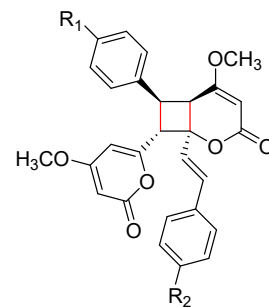

**yangonindimer A, 185**  $R_1 = OCH_3$   $R_2 = OCH_3$   
**yangonindimer B, 186**  $R_1 = OCH_3$   $R_2 = H$   
**yangonindimer C, 187**  $R_1 = H$   $R_2 = OCH_3$   
**aniba dimer A, 188**  $R_1 = H$   $R_2 = H$

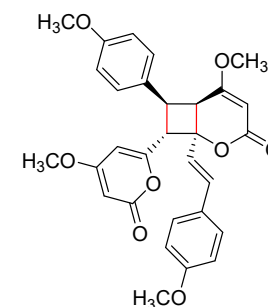

**velutinindimer B, 189**

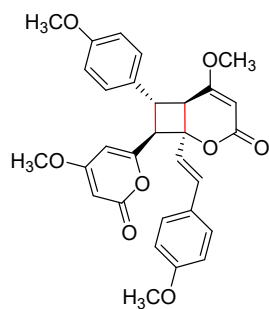

**velutinindimer C, 190**

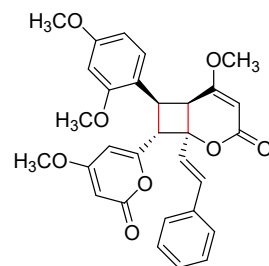

**kavalactone A, 191**

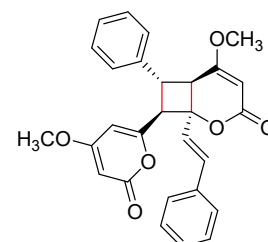

**aniba dimer C, 192**

**Phthalide [2+2] trimers**

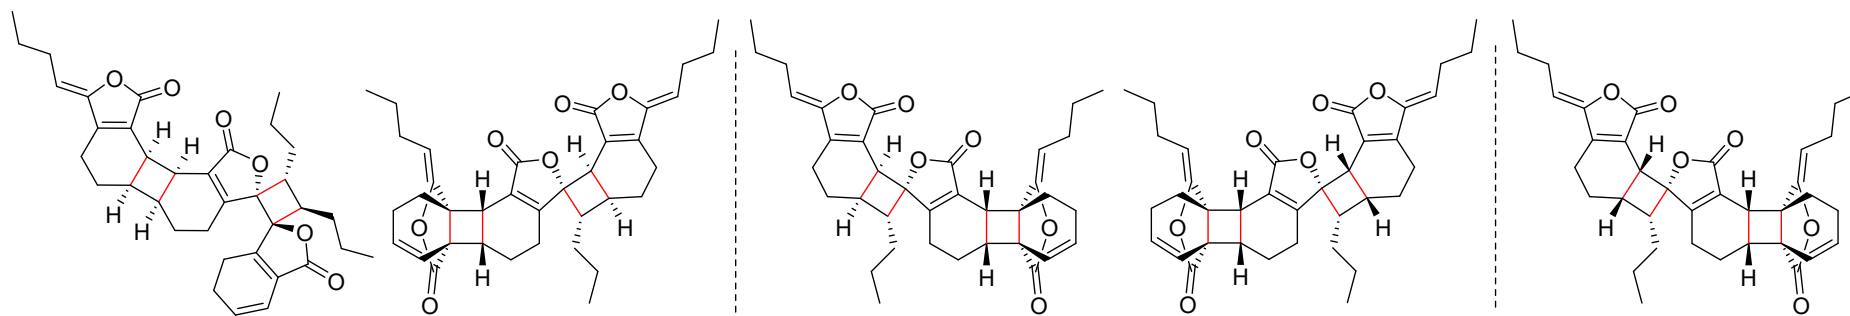

**angesinenolide A, 193**

**(-)-triligustilide A, 194a**

**(+)-triligustilide A, 194b**

**(-)-triligustilide B, 195a**

**(+)-triligustilide B, 195b**

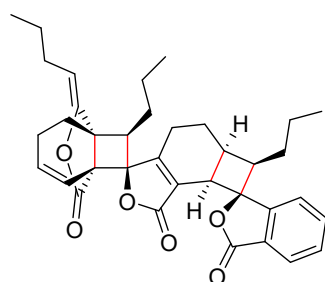

**(+)-triangelipthalide A, 196a**

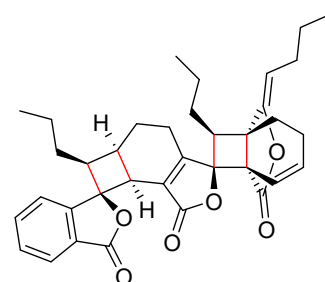

**(-)-triangelipthalide A, 196b**

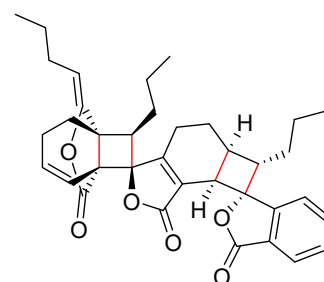

**(+)-triangelipthalide B, 197a**

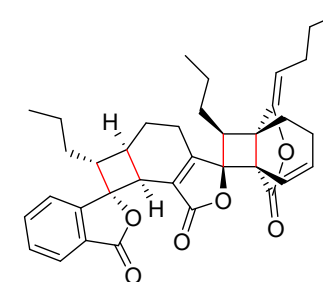

**(-) triangelipthalide B, 197b**

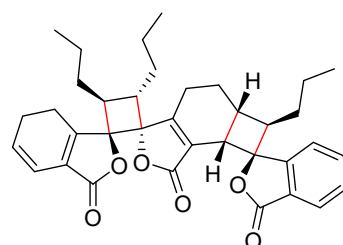

**(-)-triangelipthalide C, 198a**

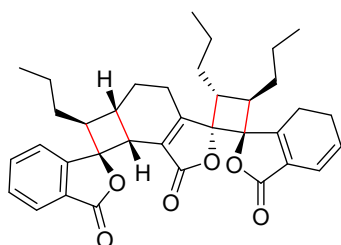

**(+)-triangelipthalide C, 198b**

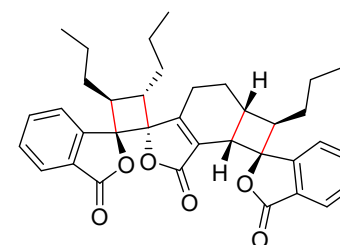

**(+)-triangelipthalide D, 199a**

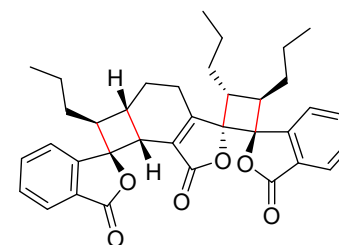

**(-)-triangelipthalide D, 199b**

Phthalide [2+2] dimers

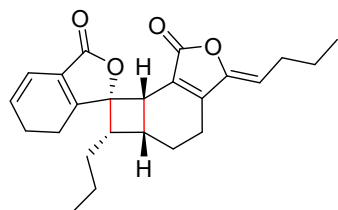

(-)-riligustilide, 200a

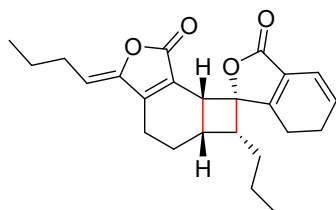

(+)-riligustilide, 200b

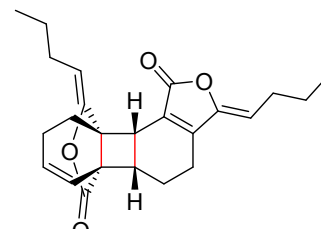

(+)-tokinolide A, 201a

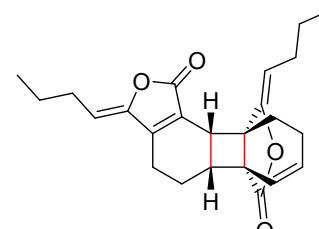

(-)-tokinolide A, 201b

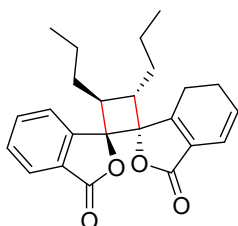

(-)-diangeliphthalide A, 202a

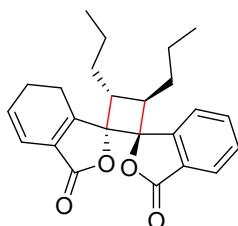

(+)-diangeliphthalide A, 202b

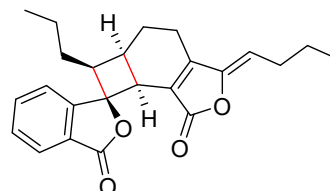

(-)-gelispirolide, 203a

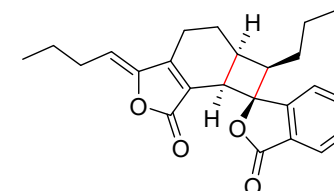

(+)-gelispirolide, 203b

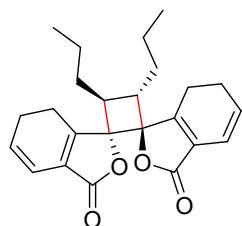

angelicolide, 204

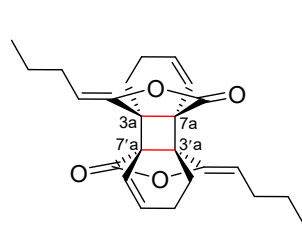

*Z,Z'*-3.3'a,7.7'a-diligustilide, 205

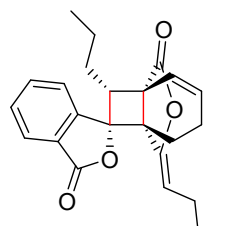

sinaspirolide, 206

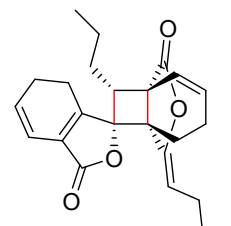

neodiligustilide, 207

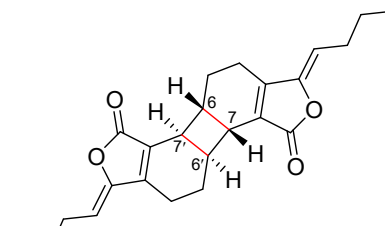

*3,3'Z*-6.7',7.6'-diligustilide, 208

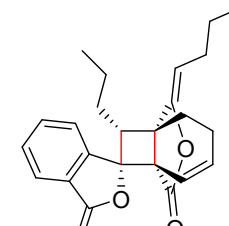

tokiaerialide, 209

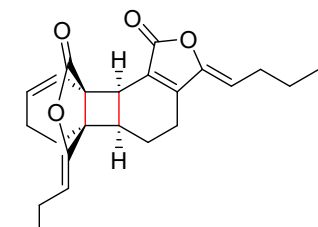

tokinolide C, 210

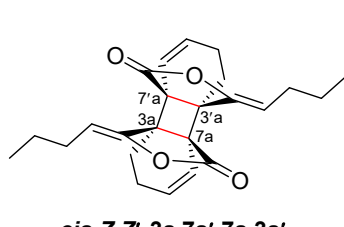

*cis-Z,Z'*-3a.7a',7a.3a'-dihydroxyligustilide, 211

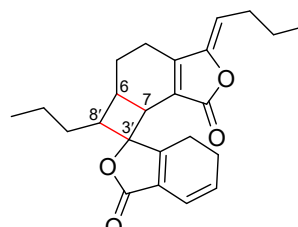

*Z,Z'*-6.8',7.3'-diligustilide, 212

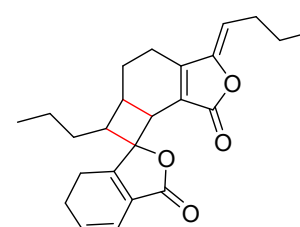

angelicide, 213

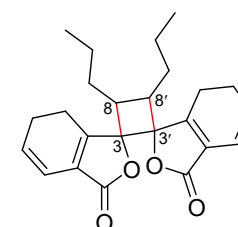

*Z,Z'*-3.3',8.8'-diligustilide, 214



**Stilbene glucoside [2+2] dimers**

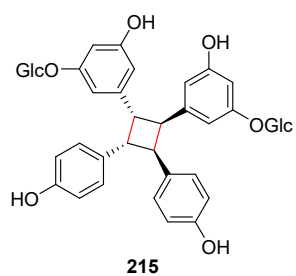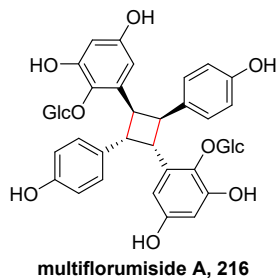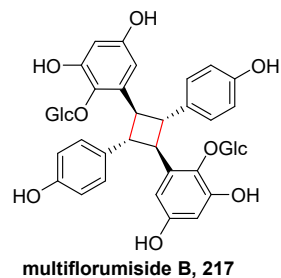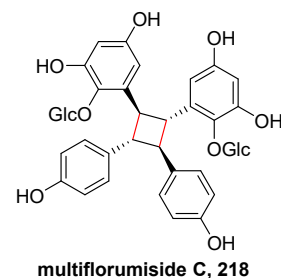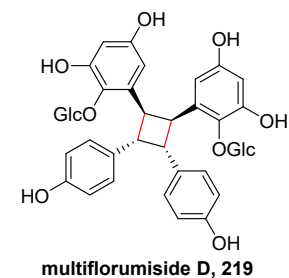

**Noncyanogenic cyanoglucoside [2+2] dimers**

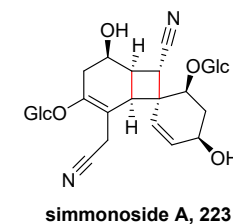

**Stilbene glucoside [2+2] dimers (continued)**

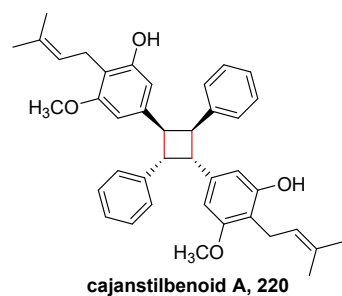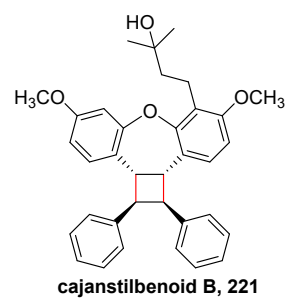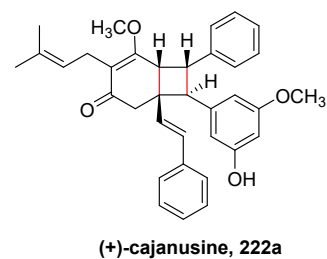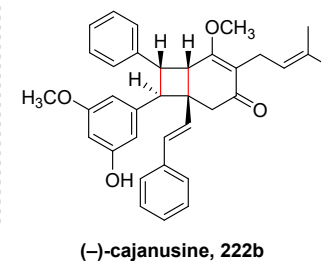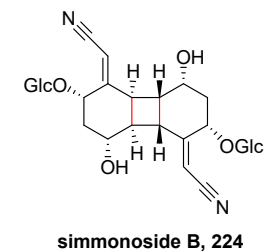

**Quinolinone alkaloids-phenylpropanoid [2+2] heter-dimers**

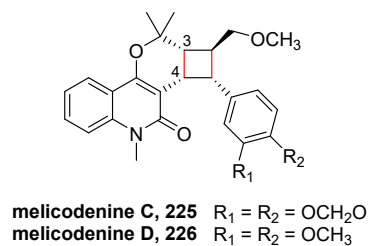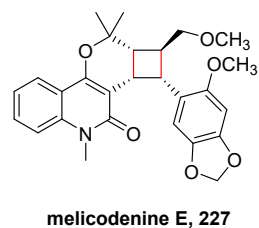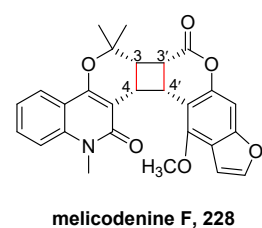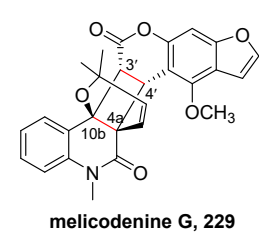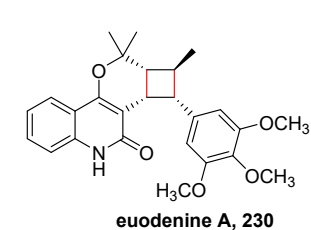

### Halogenated furanone [2+2] dimers

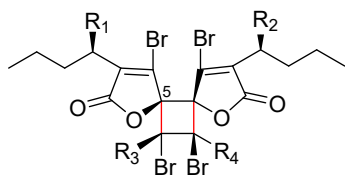

- pulchralide A, 231**  $R_1 = R_2 = \text{OAc}, R_3 = R_4 = \text{H}$   
**pulchralide B, 232**  $R_1 = R_2 = R_3 = R_4 = \text{H}$   
**pulchralide C, 233**  $R_1 = \text{OAc}, R_2 = R_3 = R_4 = \text{H}$   
**acetoxyfimbrolide C<sub>2</sub> dimer, 234**  $R_1 = R_2 = \text{H}, R_3 = R_4 = \text{Br}$   
**acetoxyfimbrolide meso dimer, 235** C-5 epimer of 234

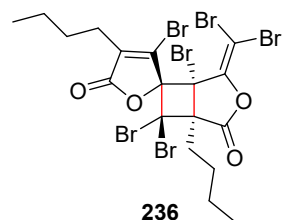

### Azaphilone [2+2] dimers

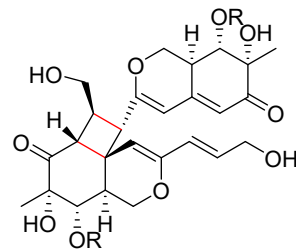

**dipleosporalone A, 237**

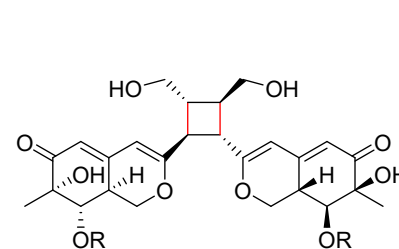

**dipleosporalone B, 238**

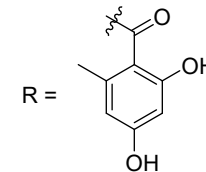

### Asteltoxin [2+2] dimers

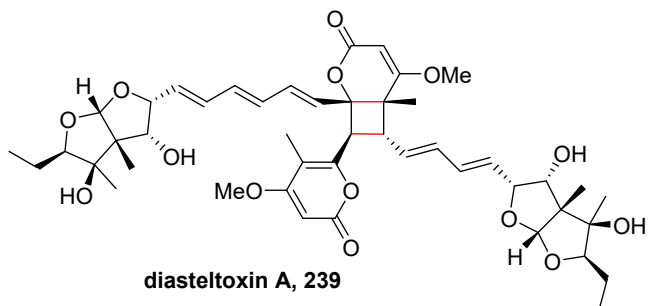

**diasteltoxin A, 239**

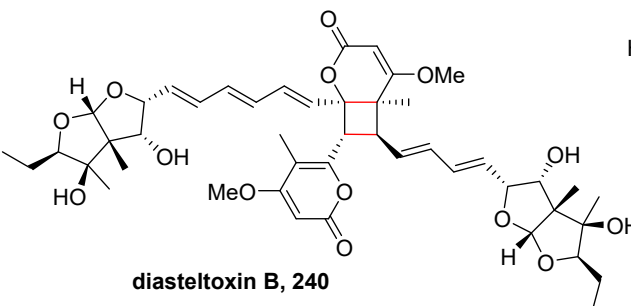

**diasteltoxin B, 240**

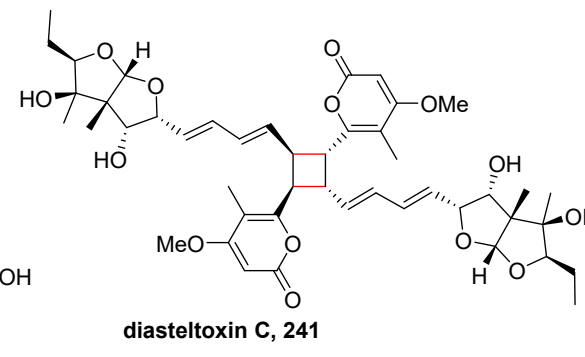

**diasteltoxin C, 241**

### $\alpha$ -Pyrone [2+2] dimers

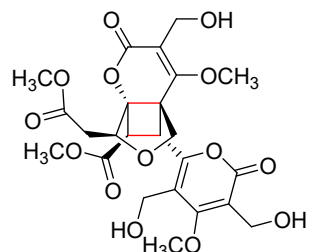

**(+)-phomone A, 242a**

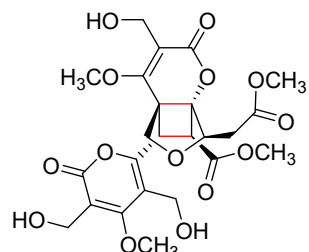

**(-)-phomone A, 242b**

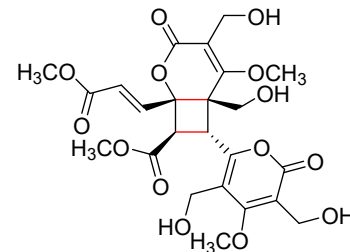

**5S,6S,7'R,8'R-phomone B, 243a**

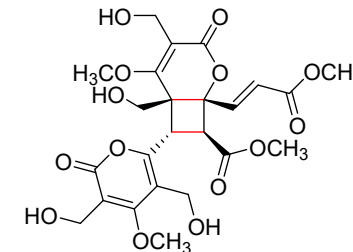

**5R,6R,7'S,8'S-phomone B, 243b**

Chromane meroterpenoids

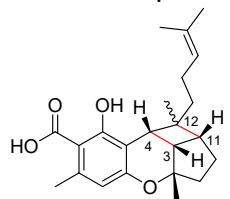

rhododaurichromanic acid A, 244 12S  
rhododaurichromanic acid B, 245 12R

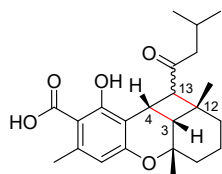

anthopogochromane  
246# 13S; 246 13R

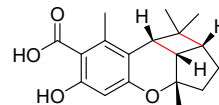

anthopogocycloic acid, 247

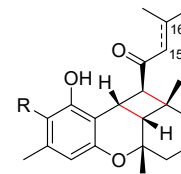

rubiginosin B, 248 R = COOH  $\Delta^{15,16}$   
rubiginosin G, 250 R = H

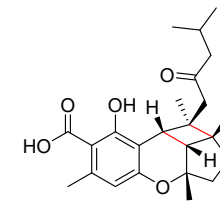

rubiginosin C, 249

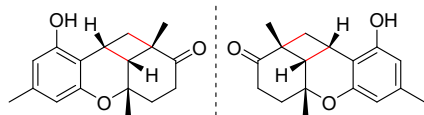

(-)-rhodonoid A, 251a (+)-rhodonoid A, 251b

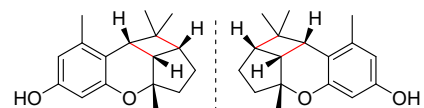

(-)-nyingchinoid D, 255a (+)-nyingchinoid D, 255b

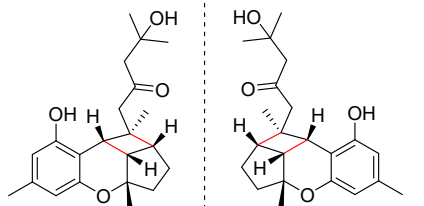

(+)-fastinoid A, 256a (-)-fastinoid A, 256b

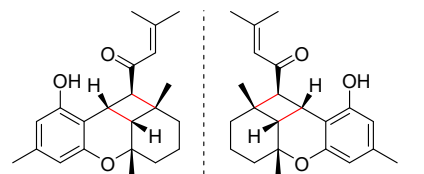

(+)-rubiginosin A, 259a (-)-rubiginosin A, 259b

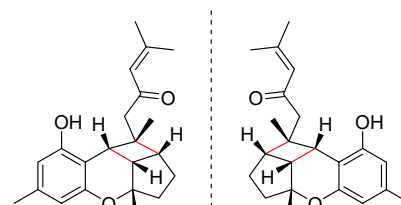

(-)-rhodonoid B, 252a (+)-rhodonoid B, 252b

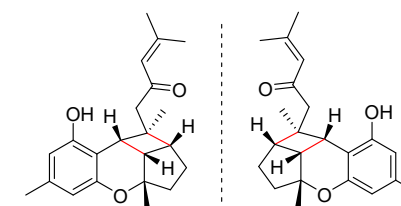

(+)-fastinoid B, 257a (-)-fastinoid B, 257b

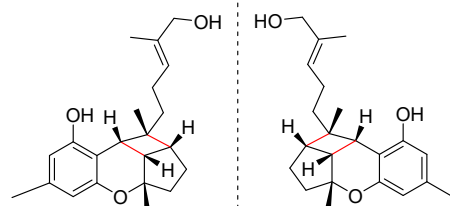

(-)-anthoponoid B, 260a (+)-anthoponoid B, 260b

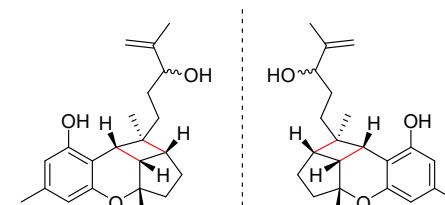

(+)-rhodonoid E, 253a 15R (-)-rhodonoid E, 253b 15S  
(+)-rhodonoid F, 254a 15S (-)-rhodonoid F, 254b 15R

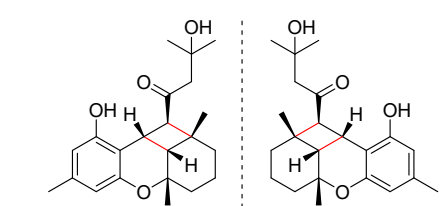

(+)-fastinoid C, 258a (-)-fastinoid C, 258b

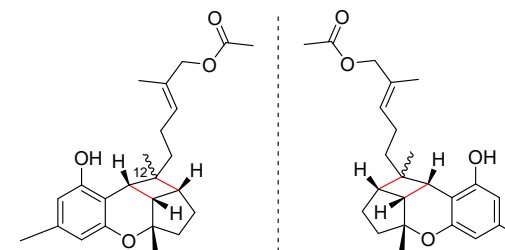

(-)-anthoponoid C, 261a 12R (+)-anthoponoid C, 261b 12S  
(+)-anthoponoid D, 262a 12S (-)-anthoponoid D, 262b 12R

**Chromane meroterpenoids (continued)**

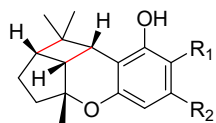

- cannabiorcycyclol, **263**  $R_1 = H$   $R_2 = CH_3$   
 cannabiorcycycloic acid, **264**  $R_1 = COOH$   $R_2 = CH_3$   
 cannabicyclovarin, **265**  $R_1 = H$   $R_2 = C_3H_7$   
 cannabicyclo (CBL), **266**  $R_1 = H$   $R_2 = C_5H_{11}$   
 cannabicycloic acid, **267**  $R_1 = COOH$   $R_2 = C_5H_{11}$

**Diterpenoids**

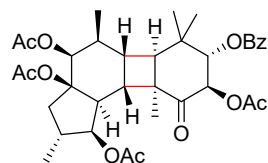

**gaditanone, 268**

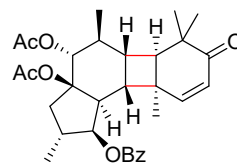

**heliosterpenoid A, 269**

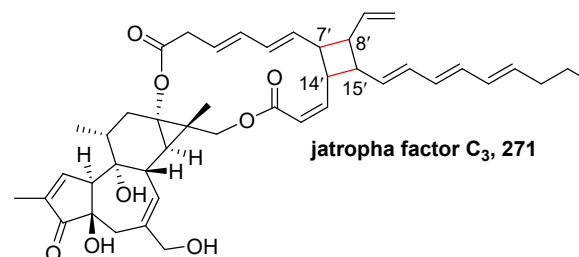

**jatropha factor C<sub>3</sub>, 271**

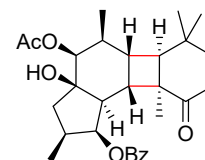

**heliosterpenoid B, 270**

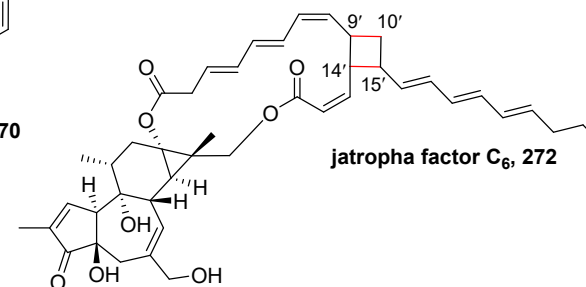

**jatropha factor C<sub>6</sub>, 272**

**Diterpenoids (continued)**

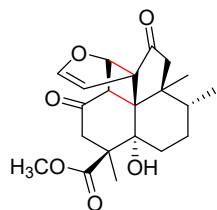

**cracoson D, 273**

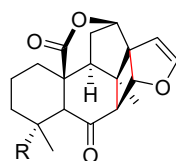

**haplomintrin A, 274**  $R = COOCH_3$   
**haplomintrin B, 275**  $R = CH_3$

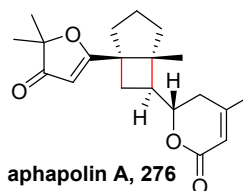

**aphapolin A, 276**

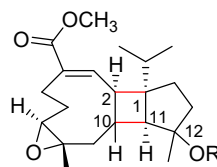

**methyl sarcotroate A, 277**  $R = H$  10*S*,12*R*  
**methyl sarcotroate B, 278**  $R = OH$  10*S*,12*R*  
**tortuosumol, 279**  $R = H$  10*R*,12*S*

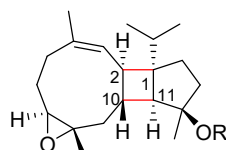

**humilisin E, 280**  $R = H$   
**humilisin F, 281**  $R = OH$

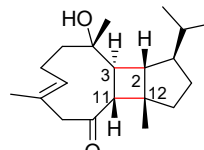

**sarcoglane, 282**

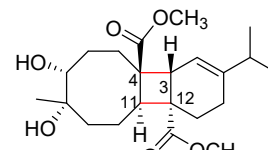

**locrassumin C, 283**

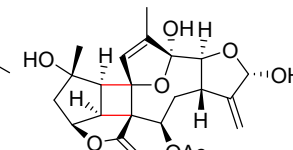

**bielschowskysin, 284**

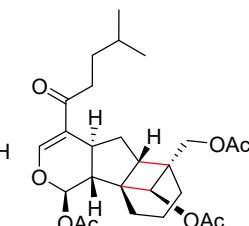

**plumisclerin A, 285**

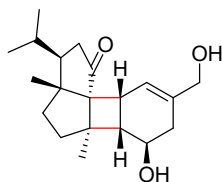

**psathyrin A, 286**

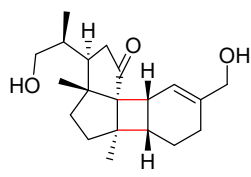

**psathyrin B, 287**

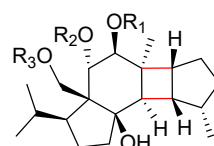

- vulgarisin A, 288**  $R_1 = COPr$   $R_2 = H$   $R_3 = COPr$   
**vulgarisin B, 289**  $R_1 = COPr$   $R_2 = H$   $R_3 = Bz$   
**vulgarisin C, 290**  $R_1 = H$   $R_2 = COPr$   $R_3 = Bz$   
**vulgarisin D, 291**  $R_1 = H$   $R_2 = COPr$   $R_3 = COPr$   
**vulgarisin E, 292**  $R_1 = H$   $R_2 = Bz$   $R_3 = COPr$   
**vulgarisin F, 293**  $R_1 = H$   $R_2 = {}^tCin$   $R_3 = COPr$

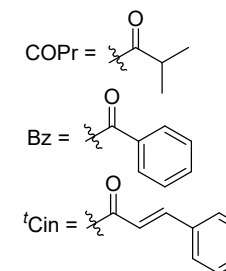

**Alkaloids**

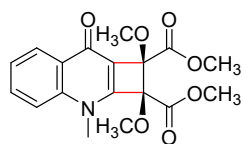

**cyclomegestine, 294**

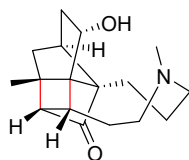

**phlegmadine A, 295**

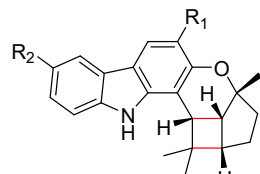

**bicyclomahanimbine, 296**  
**murrayafoline M, 297**  
R<sub>1</sub> = CH<sub>3</sub> R<sub>2</sub> = H  
R<sub>1</sub> = H R<sub>2</sub> = CH<sub>3</sub>

**Cycloneolignans**

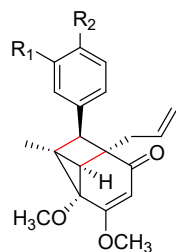

**isofutoquinol A, 298** R<sub>1</sub> = R<sub>2</sub> = -OCH<sub>2</sub>O-  
**299** R<sub>1</sub> = R<sub>2</sub> = OCH<sub>3</sub>

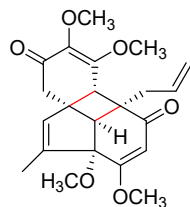

**(+)-piperhancin A, 300a**

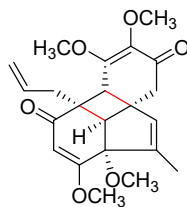

**(-)-piperhancin A, 300b**

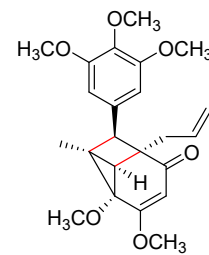

**(-)-piperhancin B, 301a**

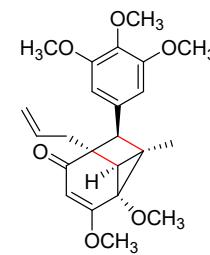

**(+)-piperhancin B, 301b**

**Coumarins**

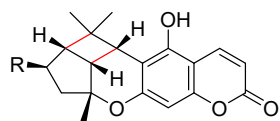

**eriobrucinol, 302** R = H

**hydroxyeriobrucinol, 303** R = OH

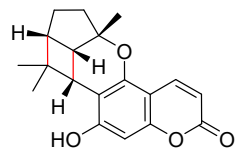

**eriobrucinol regioisomer-A, 304**

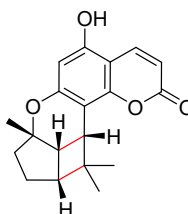

**eriobrucinol regioisomer-B, 305**

**Other compounds**

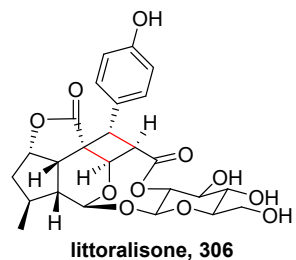

**littoralisone, 306**

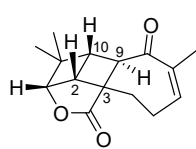

**aquatolide, 307#**  
(proposed)

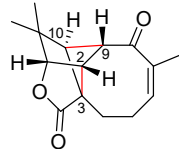

**aquatolide, 307**  
(revised)

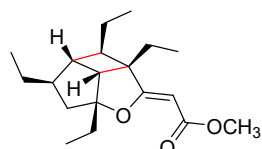

**hippolachnin A, 308**

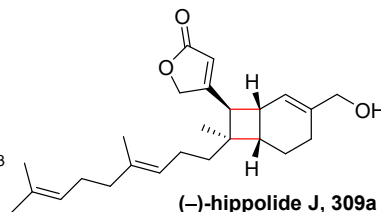

**(-)-hippolide J, 309a**

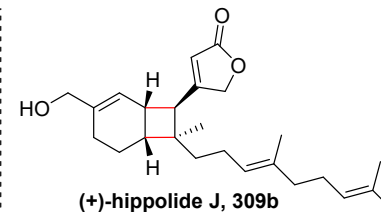

**(+)-hippolide J, 309b**

**Table S1 The structure, occurrence and optical rotation of [2 + 2]-cycloaddition-derived cyclobutane natural products.**

| NO. | Name                                                                                                                        | Structure                                                                           | Occurrence                                                   | Optical Rotation                                  | Ref. |
|-----|-----------------------------------------------------------------------------------------------------------------------------|-------------------------------------------------------------------------------------|--------------------------------------------------------------|---------------------------------------------------|------|
| 1   | piplartine-dimer A                                                                                                          | 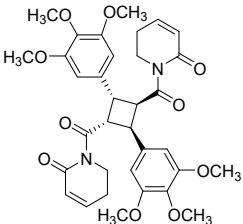  | <i>Piper tuherculatum</i> (root bark)                        | $[\alpha]_{D}^{25} 0$ (c 1.0, CHCl <sub>3</sub> ) | 1    |
| 2   | ( $\alpha,\beta,\alpha,\beta$ )-1,3-bis(3,4-dimethoxyphenyl)-2,4-bis[1-(2-carbonyl-5,6-dihydropyridine)-formyl]-cyclobutane |   | <i>Piper longum</i> (aerial parts)                           | —                                                 | 2    |
| 3   | (no trivial name given)                                                                                                     |   | <i>Piper peepuloides</i> (leaves and fruits (immature buds)) | —                                                 | 3    |
| 4   | cyclobutane-2-(1,3-benzodioxol-5-methoxy-6-yl)-4-(1,3-benzodioxol-4,5-dimethoxy-6-yl)-1,3-dicarboxapiperidide               |  | <i>Piper peepuloides</i> (leaves and fruits (immature buds)) | —                                                 | 3    |

|   |                                                                              |  |                                                              |                                                                       |   |
|---|------------------------------------------------------------------------------|--|--------------------------------------------------------------|-----------------------------------------------------------------------|---|
| 5 | cyclobutane-2,4-bis-(1,3-benzodioxol-5-methoxy-6-yl)-1,3-dicarboxapiperidide |  | <i>Piper peepuloides</i> (leaves and fruits (immature buds)) | —                                                                     | 3 |
| 6 | piperarboresine                                                              |  | <i>Piper arborescens</i> (leaves)                            | $[\alpha]_{\text{D}}^{25} 0$ ( <i>c</i> 0.4, CHCl <sub>3</sub> )      | 4 |
| 7 | piperarboresine A                                                            |  | <i>Piper arborescens</i> (stems)                             | $[\alpha]_{\text{D}}^{25} +5.5$ ( <i>c</i> 0.055, CHCl <sub>3</sub> ) | 4 |
| 8 | piperarboresine B                                                            |  | <i>Piper arborescens</i> (stems)                             | $[\alpha]_{\text{D}}^{25} 0$ ( <i>c</i> 0.11, CHCl <sub>3</sub> )     | 4 |

|    |                         |  |                                    |                                                           |                                               |
|----|-------------------------|--|------------------------------------|-----------------------------------------------------------|-----------------------------------------------|
| 9  | piperarborenine C       |  | <i>Piper arborescens</i> (stems)   | $[\alpha]_D^{25} 0$ ( <i>c</i> 1.27, CHCl <sub>3</sub> )  | 5                                             |
| 10 | piperarborenine D       |  | <i>Piper arborescens</i> (stems)   | $[\alpha]_D^{25} 0$ ( <i>c</i> 0.675, CHCl <sub>3</sub> ) | original <sup>5</sup><br>revised <sup>6</sup> |
| 11 | piperarborenine E       |  | <i>Piper arborescens</i> (stems)   | $[\alpha]_D^{25} 0$ ( <i>c</i> 0.675, CHCl <sub>3</sub> ) | 5                                             |
| 12 | pipericyclobutanamide B |  | <i>Piper nigrum</i> (unripe fruit) | —                                                         | 7                                             |
| 13 | pipericyclobutanamide C |  | <i>Piper nigrum</i> (unripe fruit) | $[\alpha]_D^{24} 0$ ( <i>c</i> 0.15, CHCl <sub>3</sub> )  | 8, 9                                          |



|    |                |                                                                                      |                                     |                                                             |                                                 |
|----|----------------|--------------------------------------------------------------------------------------|-------------------------------------|-------------------------------------------------------------|-------------------------------------------------|
| 14 | dipiperamide A | 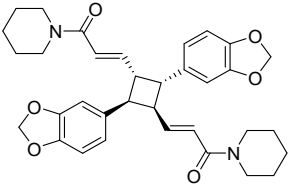   | <i>Piper nigrum</i> (ripened fruit) | $[\alpha]_{D}^{25} 0$ ( <i>c</i> 0.085, CHCl <sub>3</sub> ) | original <sup>10</sup><br>revised <sup>11</sup> |
| 15 | dipiperamide C |    | <i>Piper nigrum</i> (ripened fruit) | $[\alpha]_{D}^{25} 0$ ( <i>c</i> 0.095, CHCl <sub>3</sub> ) | 10                                              |
| 16 | dipiperamide D |    | <i>Piper nigrum</i> (ripened fruit) | $[\alpha]_{D}^{25} 0$ ( <i>c</i> 0.077, CHCl <sub>3</sub> ) | 12                                              |
| 17 | dipiperamide E |   | <i>Piper nigrum</i> (ripened fruit) | $[\alpha]_{D}^{25} 0$ ( <i>c</i> 0.18, CHCl <sub>3</sub> )  | 12                                              |
| 18 | nigramide P    |  | <i>Piper nigrum</i> (roots)         | $[\alpha]_{D}^{25} 0$ ( <i>c</i> 0.46, CHCl <sub>3</sub> )  | 13                                              |

|    |                  |                                                                                      |                                     |                                                     |    |
|----|------------------|--------------------------------------------------------------------------------------|-------------------------------------|-----------------------------------------------------|----|
| 19 | nigramide Q      | 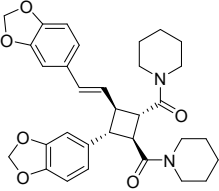   | <i>Piper nigrum</i> (roots)         | $[\alpha]_{D}^{25} 0$ (c 0.435, CHCl <sub>3</sub> ) | 13 |
| 20 | nigramide R      |    | <i>Piper nigrum</i> (roots)         | $[\alpha]_{D}^{25} 0$ (c 1.076, CHCl <sub>3</sub> ) | 13 |
| 21 | nigramide S      |    | <i>Piper nigrum</i> (roots)         | $[\alpha]_{D}^{25} 0$ (c 0.178, CHCl <sub>3</sub> ) | 13 |
| 22 | pipernigramide E |   | <i>Piper nigrum</i> (unripe fruits) | $[\alpha]_{D}^{25} 0$ (c 0.2, CHCl <sub>3</sub> )   | 14 |
| 23 | pipernigramide F |  | <i>Piper nigrum</i> (unripe fruits) | $[\alpha]_{D}^{25} 0$ (c 0.2, CHCl <sub>3</sub> )   | 14 |

|    |                  |                                                                                     |                                    |                                                                             |                                                 |
|----|------------------|-------------------------------------------------------------------------------------|------------------------------------|-----------------------------------------------------------------------------|-------------------------------------------------|
| 24 | piperchabamide H | 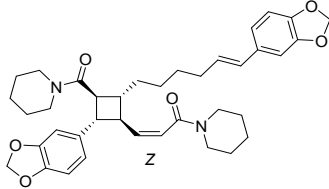  | <i>Piper chaba</i> (fruits)        | [ $\alpha$ ] <sup>27</sup> <sub>D</sub> 0 (c 0.38, CHCl <sub>3</sub> )      | 15                                              |
| 25 | dipiperamide F   |   | <i>Piper retrofractum</i> (fruits) | [ $\alpha$ ] <sup>23</sup> <sub>D</sub> -0.614 (c 0.54, CH <sub>3</sub> OH) | 16                                              |
| 26 | dipiperamide G   |   | <i>Piper retrofractum</i> (fruits) | [ $\alpha$ ] <sup>23</sup> <sub>D</sub> -0.531 (c 0.62, CH <sub>3</sub> OH) | 16                                              |
| 27 | abrusamide A     |  | <i>Abrus mollis</i> (leaves)       | [ $\alpha$ ] <sup>20</sup> <sub>D</sub> +44.6 (c 0.086, CH <sub>3</sub> OH) | original <sup>17</sup><br>revised <sup>18</sup> |

|    |              |                                                                                      |                              |                                                               |    |
|----|--------------|--------------------------------------------------------------------------------------|------------------------------|---------------------------------------------------------------|----|
| 28 | abrusamide B | 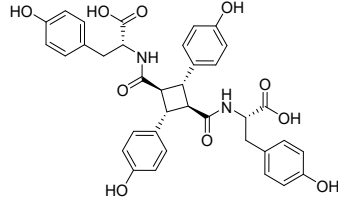   | <i>Abrus mollis</i> (leaves) | $[\alpha]^{20}_D -32.5$ ( <i>c</i> 0.081, CH <sub>3</sub> OH) | 17 |
| 29 | abrusamide C |    | <i>Abrus mollis</i> (leaves) | —                                                             | 18 |
| 30 | abrusamide D |    | <i>Abrus mollis</i> (leaves) | $[\alpha]^{20}_D +34.6$ ( <i>c</i> 0.08, CH <sub>3</sub> OH)  | 18 |
| 31 | abrusamide E |   | <i>Abrus mollis</i> (leaves) | $[\alpha]^{20}_D +60.3$ ( <i>c</i> 0.11, CH <sub>3</sub> OH)  | 18 |
| 32 | abrusamide F |  | <i>Abrus mollis</i> (leaves) | $[\alpha]^{20}_D +55.6$ ( <i>c</i> 0.1, CH <sub>3</sub> OH)   | 18 |

|    |              |  |                                            |                                                           |    |
|----|--------------|--|--------------------------------------------|-----------------------------------------------------------|----|
| 33 | abrusamide G |  | <i>Abrus mollis</i> (leaves)               | $[\alpha]^{20}_D -11.8$ (c 0.11,<br>CH <sub>3</sub> OH)   | 18 |
| 34 | abrusamide H |  | <i>Abrus mollis</i> (leaves)               | $[\alpha]^{20}_D +62.8$ (c 0.12,<br>CH <sub>3</sub> OH)   | 18 |
| 35 | grahamine    |  | <i>Schizanthus grahamii</i> (aerial parts) | $[\alpha]^{20}_D +6.21$ (c 0.0016,<br>CHCl <sub>3</sub> ) | 19 |
| 36 | grahamine A  |  | <i>Schizanthus grahamii</i> (aerial parts) | —                                                         | 20 |

|    |             |  |                                            |   |    |
|----|-------------|--|--------------------------------------------|---|----|
| 37 | grahamine B |  | <i>Schizanthus grahamii</i> (aerial parts) | — | 20 |
| 38 | grahamine C |  | <i>Schizanthus grahamii</i> (aerial parts) | — | 20 |
| 39 | grahamine D |  | <i>Schizanthus grahamii</i> (aerial parts) | — | 20 |
| 40 | grahamine E |  | <i>Schizanthus grahamii</i> (aerial parts) | — | 20 |

|     |                  |  |                                                   |                                                                           |    |
|-----|------------------|--|---------------------------------------------------|---------------------------------------------------------------------------|----|
| 41  | moonine A        |  | <i>Erythroxyllum moonii</i> (leaves)              | —                                                                         | 21 |
| 42  | moonine B        |  | <i>Erythroxyllum moonii</i> (leaves)              | —                                                                         | 21 |
| 43a | (-)-uncarilin A  |  | <i>Uncaria rhynchophylla</i> (hook-bearing stems) | [ $\alpha$ ] <sup>25</sup> <sub>D</sub> -53.0 (c 0.1, CH <sub>3</sub> CN) | 22 |
| 43b | (+) -uncarilin A |  | <i>Uncaria rhynchophylla</i> (hook-bearing stems) | [ $\alpha$ ] <sup>25</sup> <sub>D</sub> +24.0 (c 0.1, CH <sub>3</sub> CN) | 22 |
| 44a | (-)-uncarilin B  |  | <i>Uncaria rhynchophylla</i> (hook-bearing stems) | [ $\alpha$ ] <sup>25</sup> <sub>D</sub> -11.0 (c 0.1, CH <sub>3</sub> CN) | 22 |

|     |                    |                                                                                      |                                                   |                                                                            |    |
|-----|--------------------|--------------------------------------------------------------------------------------|---------------------------------------------------|----------------------------------------------------------------------------|----|
| 44b | (+)–uncarilin B    | 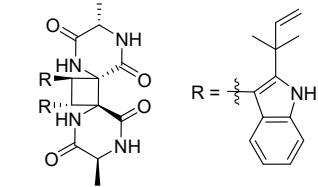   | <i>Uncaria rhynchophylla</i> (hook-bearing stems) | [ $\alpha$ ] <sub>D</sub> <sup>25</sup> +6 (c 0.1, CH <sub>3</sub> CN)     | 22 |
| 45a | (–)-asperginulin A |    | <i>Aspergillus</i> sp. SK-28                      | [ $\alpha$ ] <sub>D</sub> <sup>25</sup> –128.9 (c 0.5, CH <sub>3</sub> OH) | 23 |
| 45b | (+)–asperginulin A |    | <i>Aspergillus</i> sp. SK-28                      | [ $\alpha$ ] <sub>D</sub> <sup>25</sup> +126.7 (c 0.5, CH <sub>3</sub> OH) | 23 |
| 46  | biswasalexin A1    |   | <i>Thellungiella halophila</i>                    | —                                                                          | 24 |
| 47  | biswasalexin A2    |  | <i>Thellungiella halophila</i>                    | —                                                                          | 24 |



|    |                  |                                                                                      |                                           |                                                      |    |
|----|------------------|--------------------------------------------------------------------------------------|-------------------------------------------|------------------------------------------------------|----|
| 48 | schischkiniin    | 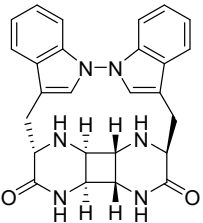   | <i>Centaurea schischkinii</i> (seeds)     | —                                                    | 25 |
| 49 | orthidine E      |    | <i>Aplidium orthium</i>                   | —                                                    | 26 |
| 50 | caracasandiamide |    | <i>Verbesina caracasana</i> (leaves)      | $[\alpha]_D 0$                                       | 27 |
| 51 | flueggidine      |   | <i>Flueggea virosa</i> (twigs and leaves) | $[\alpha]_D^{25} -33.5$ (c 0.26, CHCl <sub>3</sub> ) | 28 |
| 52 | quassidine A     |  | <i>Picrasma quassioides</i> (stems)       | $[\alpha]_D^{25} 0$ (c 0.5, CHCl <sub>3</sub> )      | 29 |

|     |                     |                                                                                     |                                                            |                                                                                  |    |
|-----|---------------------|-------------------------------------------------------------------------------------|------------------------------------------------------------|----------------------------------------------------------------------------------|----|
| 53  | orthoscuticelline A | 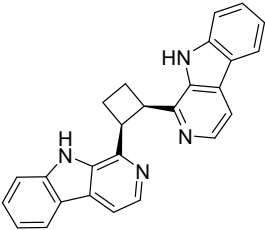  | bryozoan <i>Orthoscuticella ventricosa</i>                 | —                                                                                | 30 |
| 54  | orthoscuticelline B |   | bryozoan <i>Orthoscuticella ventricosa</i>                 | —                                                                                | 30 |
| 55a | (+) -tengerensine   |   | <i>Ficus fistulosa</i> var. <i>tengerensis</i><br>(leaves) | [ $\alpha$ ] <sub>D</sub> <sup>25</sup> +62 ( <i>c</i> 0.02, CHCl <sub>3</sub> ) | 31 |
| 55b | (–) -tengerensine   |  | <i>Ficus fistulosa</i> var. <i>tengerensis</i><br>(leaves) | [ $\alpha$ ] <sub>D</sub> <sup>25</sup> –58 ( <i>c</i> 0.06, CHCl <sub>3</sub> ) | 31 |

|     |                      |  |                                  |                                                              |    |
|-----|----------------------|--|----------------------------------|--------------------------------------------------------------|----|
| 56  | 15'-oxoadenosceptrin |  | <i>Agelas sceptrum</i>           | —                                                            | 32 |
| 57  | hexazosceptrin       |  | <i>Agelas sp</i>                 | $[\alpha]^{20}_D +5.7$ ( <i>c</i> 0.2, CH <sub>3</sub> OH)   | 33 |
| 58  | ageleste A           |  | <i>Agelas sp</i>                 | $[\alpha]^{20}_D -18$ ( <i>c</i> 0.18, CH <sub>3</sub> OH)   | 33 |
| 59  | ageleste B           |  | <i>Agelas sp</i>                 | $[\alpha]^{20}_D +5.7$ ( <i>c</i> 0.2, CH <sub>3</sub> OH)   | 33 |
| 60a | (-)-millpuline A     |  | <i>Millettia pulchra</i> (roots) | $[\alpha]^{20}_D -30.5$ ( <i>c</i> 1.05, CHCl <sub>3</sub> ) | 34 |

|     |                                                                                                                                                                               |                                                                                      |                                               |                                                                                      |    |
|-----|-------------------------------------------------------------------------------------------------------------------------------------------------------------------------------|--------------------------------------------------------------------------------------|-----------------------------------------------|--------------------------------------------------------------------------------------|----|
| 60b | (+)–millipuline A                                                                                                                                                             | 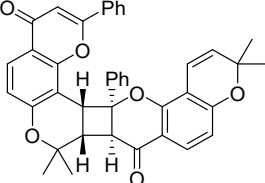   | <i>Millettia pulchra</i> (roots)              | [ $\alpha$ ] <sup>20</sup> <sub>D</sub> +23.7 ( <i>c</i> 1.02, CHCl <sub>3</sub> )   | 34 |
| 61  | <i>rel</i> –1 $\beta$ ,2 $\alpha$ –di–(2,4–dihydroxy–6–methoxybenzoyl)–3 $\beta$ ,4 $\alpha$ –di–(4–methoxyphenyl)–cyclobutane                                                |    | <i>Goniothalamus gardneri</i> (aerial parts)  | [ $\alpha$ ] <sup>23.5</sup> <sub>D</sub> +17.2 ( <i>c</i> 0.29, CHCl <sub>3</sub> ) | 35 |
| 62  | <i>rel</i> –1 $\beta$ –(4,6–dihydroxy–2–methoxy)–benzoyl– <i>rel</i> –2 $\alpha$ –(2,6–dimethoxy–4–hydroxy)–benzoyl– <i>rel</i> –(3 $\beta$ ,4 $\alpha$ )–diphenylcyclobutane |    | <i>Combretum albopunctatum</i> (aerial parts) | [ $\alpha$ ] <sup>21</sup> <sub>D</sub> +19.3 ( <i>c</i> 0.1, CH <sub>3</sub> OH)    | 36 |
| 63  | <i>rel</i> –(1 $\alpha$ ,2 $\beta$ )–di–(2,6–dimethoxy–4–hydroxy)–benzoyl– <i>rel</i> –(3 $\alpha$ ,4 $\beta$ )–diphenylcyclobutane                                           |   | <i>Combretum albopunctatum</i> (aerial parts) | [ $\alpha$ ] <sup>21</sup> <sub>D</sub> +17.5 ( <i>c</i> 0.5, CH <sub>3</sub> OH)    | 36 |
| 64  | <i>rel</i> –(1 $\beta$ ,2 $\alpha$ )–di–(2,4–dihydroxybenzoyl)– <i>rel</i> –(3 $\beta$ ,4 $\alpha$ )–di–(4–hydroxyphenyl)–cyclobutane                                         |  | <i>Agapanthus africanus</i> (roots)           | —                                                                                    | 36 |

|            |                       |                                                                                      |                                              |                                                      |        |
|------------|-----------------------|--------------------------------------------------------------------------------------|----------------------------------------------|------------------------------------------------------|--------|
| <b>65</b>  | oxyfadichalcone B     | 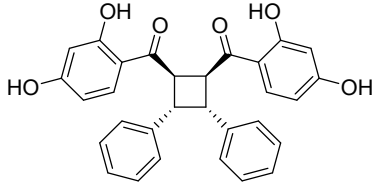   | <i>Oxytropis chiliophylla</i> (whole plants) | optically inactive                                   | 37, 38 |
| <b>66a</b> | (+)-oxyfadichalcone C |    | <i>Oxytropis chiliophylla</i> (whole plants) | $[\alpha]_D^{20} +40.0$ (c 0.1, CH <sub>3</sub> OH)  | 37, 38 |
| <b>66b</b> | (-)-oxyfadichalcone C |    | <i>Oxytropis chiliophylla</i> (whole plants) | $[\alpha]_D^{20} -37.0$ (c 0.1, CH <sub>3</sub> OH)  | 37, 38 |
| <b>67a</b> | (+)-oxyfadichalcone F |   | <i>Oxytropis chiliophylla</i> (whole plants) | $[\alpha]_D^{20} +166.0$ (c 0.1, CH <sub>3</sub> OH) | 38     |
| <b>67b</b> | (-)-oxyfadichalcone F |  | <i>Oxytropis chiliophylla</i> (whole plants) | $[\alpha]_D^{20} -147.2$ (c 0.1, CH <sub>3</sub> OH) | 38     |

|    |                   |                                                                                      |                                              |                                                    |        |
|----|-------------------|--------------------------------------------------------------------------------------|----------------------------------------------|----------------------------------------------------|--------|
| 68 | paufferol A       | 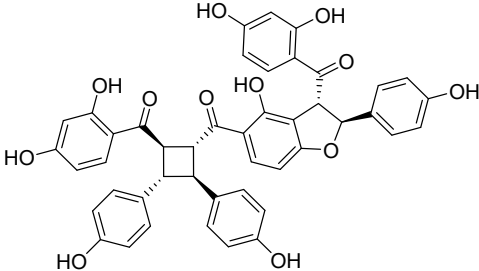   | <i>Caesalpinia ferrea</i> (stems)            | $[\alpha]_{25}^D +211$ (c 0.1, CH <sub>3</sub> OH) | 39     |
| 69 | oxyfadichalcone A |    | <i>Oxytropis chiliophylla</i> (whole plants) | optically inactive                                 | 37, 38 |
| 70 | oxyfadichalcone D |    | <i>Oxytropis chiliophylla</i> (whole plants) | optically inactive                                 | 38     |
| 71 | oxyfadichalcone E |   | <i>Oxytropis chiliophylla</i> (whole plants) | optically inactive                                 | 38     |
| 72 | tomoroside A      |  | <i>Helichrysum zivojinii</i> (aerial parts)  | $[\alpha]_{20}^D +6.0$ (c 0.1, CHCl <sub>3</sub> ) | 40     |

|    |               |  |                                       |                                                       |    |
|----|---------------|--|---------------------------------------|-------------------------------------------------------|----|
| 73 | vielanin B    |  | <i>Xylopi</i> <i>vielana</i> (leaves) | —                                                     | 41 |
| 74 | vielanin C    |  | <i>Xylopi</i> <i>vielana</i> (leaves) | $[\alpha]_D^{26} -120$ (c 0.5, CHCl <sub>3</sub> )    | 41 |
| 75 | vielaninor Q  |  | <i>Xylopi</i> <i>vielana</i> (leaves) | $[\alpha]_D^{25} -196.54$ (c 0.1, CH <sub>3</sub> OH) | 42 |
| 76 | vielaninor R  |  | <i>Xylopi</i> <i>vielana</i> (leaves) | $[\alpha]_D^{25} -287.45$ (c 0.1, CH <sub>3</sub> OH) | 42 |
| 77 | xylopidimer D |  | <i>Xylopi</i> <i>vielana</i> (roots)  | $[\alpha]_D^{20} -77.3$ (c 0.11, CH <sub>3</sub> OH)  | 43 |

|    |                     |                                                                                      |                                                    |                                                      |                                                         |
|----|---------------------|--------------------------------------------------------------------------------------|----------------------------------------------------|------------------------------------------------------|---------------------------------------------------------|
| 78 | xylopiana A         | 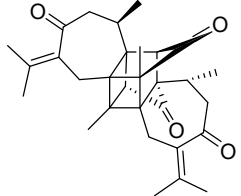   | <i>Xylopiella vielana</i> (leaves)                 | $[\alpha]_D^{25} +91.0$ (c 0.2, CH <sub>3</sub> OH)  | 44                                                      |
| 79 | artelein            |    | <i>Artemisia leucode</i> (leaves and flower heads) | —                                                    | 45                                                      |
| 80 | artemin A           |    | <i>Artemisia sieversiana</i> (aerial parts)        | —                                                    | 46                                                      |
| 81 | biliguhodgsonolide  |   | <i>Ligularia hodgsonii</i> (roots and rhizomes)    | $[\alpha]_D^{20} +66$ (c 0.26, CHCl <sub>3</sub> )   | 47                                                      |
| 82 | chloranthalactone F |  | <i>Chloranthus glaber</i> (leaves)                 | $[\alpha]_D^{20} +30.8$ (c 0.52, CHCl <sub>3</sub> ) | original <sup>48</sup><br>revised <sup>49</sup> ,<br>50 |



|    |                  |                                                                                      |                                          |                                                                            |    |
|----|------------------|--------------------------------------------------------------------------------------|------------------------------------------|----------------------------------------------------------------------------|----|
| 83 | chololactone H   | 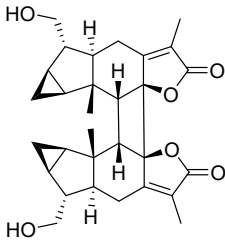   | <i>Chloranthus holostegius</i> (roots)   | $[\alpha]_{\text{D}}^{25} -64.2$ ( <i>c</i> 0.25,<br>CH <sub>3</sub> OH)   | 51 |
| 84 | chlorahupetone A |    | <i>Chloranthus henryi</i> (aerial parts) | $[\alpha]_{\text{D}}^{25} -81.30$ ( <i>c</i> 0.04,<br>CH <sub>3</sub> OH)  | 52 |
| 85 | chlorahupetone B |    | <i>Chloranthus henryi</i> (aerial parts) | $[\alpha]_{\text{D}}^{25} +189.97$ ( <i>c</i> 0.03,<br>CH <sub>3</sub> OH) | 52 |
| 86 | chlorahupetone C |   | <i>Chloranthus henryi</i> (aerial parts) | $[\alpha]_{\text{D}}^{25} -152.67$ ( <i>c</i> 0.04,<br>CH <sub>3</sub> OH) | 52 |
| 87 | chlorahupetone D |  | <i>Chloranthus henryi</i> (aerial parts) | $[\alpha]_{\text{D}}^{25} +252.83$ ( <i>c</i> 0.05,<br>CH <sub>3</sub> OH) | 52 |

|    |                  |                                                                                      |                                           |                                                          |    |
|----|------------------|--------------------------------------------------------------------------------------|-------------------------------------------|----------------------------------------------------------|----|
| 88 | chlorahupetone E | 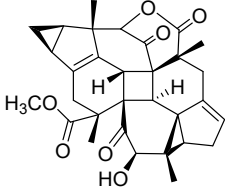   | <i>Chloranthus henryi</i> (aerial parts)  | $[\alpha]_{D}^{25} +162.44$ (c 0.06, CH <sub>3</sub> OH) | 52 |
| 89 | bimutipterosin A |    | <i>Pteris multifida</i> (whole plants)    | $[\alpha]_{D}^{20} -3.1$ (c 0.1, CH <sub>3</sub> OH)     | 53 |
| 90 | bimutipterosin B |    | <i>Pteris multifida</i> (whole plants)    | $[\alpha]_{D}^{20} -7.3$ (c 0.1, CH <sub>3</sub> OH)     | 53 |
| 91 | artepestrin A    |    | <i>Artemisia rupestris</i> (whole plants) | $[\alpha]_{D}^{21} -36$ (c 0.1, CH <sub>3</sub> OH)      | 54 |
| 92 | artepestrin B    |   | <i>Artemisia rupestris</i> (whole plants) | $[\alpha]_{D}^{21} +286$ (c 0.1, CH <sub>3</sub> OH)     | 54 |
| 93 | artepestrin C    |  | <i>Artemisia rupestris</i> (whole plants) | $[\alpha]_{D}^{21} +274$ (c 0.1, CH <sub>3</sub> OH)     | 54 |

|    |                  |                                                                                      |                                                                                                                     |                                                                                   |    |
|----|------------------|--------------------------------------------------------------------------------------|---------------------------------------------------------------------------------------------------------------------|-----------------------------------------------------------------------------------|----|
| 94 | maocrystal M     | 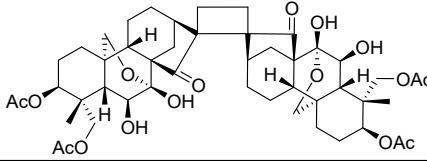   | <i>Robdosia eriocalyx</i> (leaves)<br>[The name has been revised to<br><i>Isodon eriocalyx</i> ] <sup>55</sup>      | $[\alpha]^{22}_D +44.0$ ( <i>c</i> 0.2, CHCl <sub>3</sub> )                       | 56 |
| 95 | bisjaponin A     |    | <i>Isodon japonicus</i> (aerial parts)                                                                              | $[\alpha]^{26}_D -3.6$ ( <i>c</i> 0.595, CH <sub>3</sub> OH)                      | 57 |
| 96 | bisjaponin B     |    | <i>Isodon japonicus</i> (aerial parts)                                                                              | $[\alpha]^{26}_D +8.52$ ( <i>c</i> 0.305, CH <sub>3</sub> OH)                     | 57 |
| 97 | neoglaucocalyxin |    | <i>Rabdosia japonica</i> (aerial parts)<br>[The name has been revised to<br><i>Isodon japonicas</i> ] <sup>55</sup> | $[\alpha]^{25}_D -31.078$ ( <i>c</i> 0.5, CHCl <sub>3</sub> )                     | 58 |
| 98 | bistenuifolin L  |   | <i>Isodon tenuifolius</i> (aerial parts)                                                                            | $[\alpha]^{21}_D +19$ ( <i>c</i> 0.1, CHCl <sub>3</sub> -CH <sub>3</sub> OH, 1:1) | 59 |
| 99 | bistenuifolin M  |  | <i>Isodon tenuifolius</i> (aerial parts)                                                                            | $[\alpha]^{20}_D +22$ ( <i>c</i> 0.2, CHCl <sub>3</sub> -CH <sub>3</sub> OH, 1:1) | 59 |

|     |                 |                                                                                      |                                         |                                                         |    |
|-----|-----------------|--------------------------------------------------------------------------------------|-----------------------------------------|---------------------------------------------------------|----|
| 100 | crotoeurin A    | 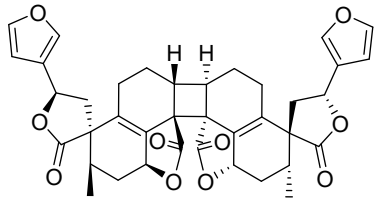   | <i>Croton euryphyllus</i> (leaves)      | $[\alpha]_{25.1}^D +56.29$ (c 0.16, CH <sub>3</sub> OH) | 60 |
| 101 | aphadilactone E |    | <i>Aphanamixis grandifolia</i> (leaves) | $[\alpha]_{22}^D -16.5$ (c 0.2, CH <sub>3</sub> OH)     | 61 |
| 102 | aphadilactone F |    | <i>Aphanamixis grandifolia</i> (leaves) | $[\alpha]_{22}^D -19.4$ (c 0.16, CH <sub>3</sub> OH)    | 61 |
| 103 | aphadilactone G |  | <i>Aphanamixis grandifolia</i> (leaves) | $[\alpha]_{22}^D -3.3$ (c 0.12, CH <sub>3</sub> OH)     | 61 |

|      |                              |                                                                                                                 |                                        |                                                                            |    |
|------|------------------------------|-----------------------------------------------------------------------------------------------------------------|----------------------------------------|----------------------------------------------------------------------------|----|
| 104  | bisotortuolide cyclobutane A | 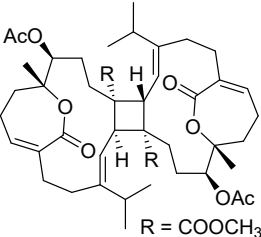 <p>R = COOCH<sub>3</sub></p> | <i>Sarcophyton Tortuosum</i>           | [ $\alpha$ ] <sup>25</sup> <sub>D</sub> +55.8 (c 0.71, CHCl <sub>3</sub> ) | 62 |
| 105a | (+) -hyperterpenoid A        |                               | <i>Hypericum beanie</i> (aerial parts) | [ $\alpha$ ] <sup>25</sup> <sub>D</sub> +35.9 (c 0.15, CH <sub>3</sub> OH) | 63 |
| 105b | (−) -hyperterpenoid A        |                               | <i>Hypericum beanie</i> (aerial parts) | [ $\alpha$ ] <sup>25</sup> <sub>D</sub> −36.3 (c 0.15, CH <sub>3</sub> OH) | 63 |
| 106a | (+) -hyperterpenoid B        |                              | <i>Hypericum beanie</i> (aerial parts) | [ $\alpha$ ] <sup>25</sup> <sub>D</sub> +56.8 (c 0.1, CH <sub>3</sub> OH)  | 63 |
| 106b | (−) -hyperterpenoid B        |                             | <i>Hypericum beanie</i> (aerial parts) | [ $\alpha$ ] <sup>25</sup> <sub>D</sub> −55.9 (c 0.1, CH <sub>3</sub> OH)  | 63 |

107

scopariusic acid

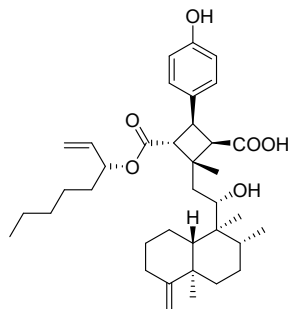*Isodon scoparius* (aerial parts) $[\alpha]^{20}_D +8.91$  (*c* 0.1, CH<sub>3</sub>OH)

63

108

scopariusicide A

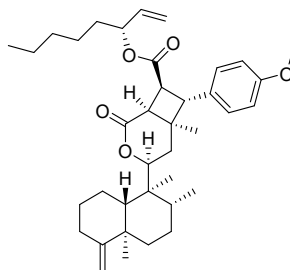*Isodon scoparius* (aerial parts) $[\alpha]^{21}_D -35.51$  (*c* 0.12, CH<sub>3</sub>OH)

63

109

scopariusicide B

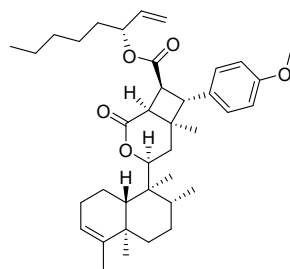*Isodon scoparius* (aerial parts) $[\alpha]^{22}_D -84.17$  (*c* 0.07, CH<sub>3</sub>OH)

63

|     |                  |  |                                                                  |                                                                  |                                                        |
|-----|------------------|--|------------------------------------------------------------------|------------------------------------------------------------------|--------------------------------------------------------|
| 110 | scopariusicide C |  | <i>Isodon scoparius</i> (aerial parts)                           | $[\alpha]_{28}^D -183.5$ ( <i>c</i> 0.06,<br>CH <sub>3</sub> OH) | 64                                                     |
| 111 | isoscopariusin A |  | <i>Isodon scoparius</i> (aerial parts)                           | $[\alpha]_{17}^D -25.8$ ( <i>c</i> 0.13,<br>CH <sub>3</sub> OH)  | 65                                                     |
| 112 | biyouyanagin A   |  | <i>Hypericum chinense</i> . var.<br><i>salicifolium</i> (leaves) | $[\alpha]_D -240.0$ ( <i>c</i> 0.5, CHCl <sub>3</sub> )          | original <sup>66</sup><br>revised <sup>67,</sup><br>68 |
| 113 | biyouyanagin B   |  | <i>Hypericum chinense</i> (leaves)                               | $[\alpha]_{22}^D -5.9$ ( <i>c</i> 0.2, CHCl <sub>3</sub> )       | original <sup>69</sup><br>revised <sup>70</sup>        |

|     |                   |                                                                                      |                                                    |                                                     |    |
|-----|-------------------|--------------------------------------------------------------------------------------|----------------------------------------------------|-----------------------------------------------------|----|
| 114 | bergapten dimer   | 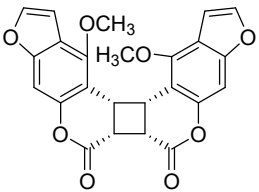   | <i>Citrus lumia</i> (peels)                        | —                                                   | 71 |
| 115 | diseselin A       |    | <i>Clausena lenisi</i> (aerial parts)              | —                                                   | 72 |
| 116 | diseselin B       |    | <i>Clausena lenis</i> (aerial parts)               | $[\alpha]^{19}_D -3.33$ (c 0.3, CHCl <sub>3</sub> ) | 73 |
| 117 | diarchangelicin A |   | <i>Cicuta virosa</i> (aerial parts)                | $[\alpha]^{20}_D -63$ (c 0.11, CH <sub>3</sub> OH)  | 74 |
| 118 | heterotropan      |  | <i>Heterotropa takaoi</i> (fresh leaves and roots) | $[\alpha]^{23}_D 0$                                 | 75 |



|     |               |                                                                                      |                                                                      |                                                    |                                                 |
|-----|---------------|--------------------------------------------------------------------------------------|----------------------------------------------------------------------|----------------------------------------------------|-------------------------------------------------|
| 119 | magnosalin    | 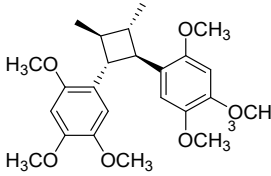   | <i>Magnolia</i> (buds)                                               | $[\alpha]_D 0$ (CHCl <sub>3</sub> )                | original <sup>76</sup><br>revised <sup>77</sup> |
| 120 | andamanicin   |    | <i>Piper sumatranum</i> var.<br><i>andamanica</i> (leaves and stems) | optically inactive                                 | original <sup>78</sup><br>revised <sup>77</sup> |
| 121 | cinbalansan   |    | <i>Cinnamomum balansae</i> (dried<br>leaves)                         | $[\alpha]_D 0$                                     | 79                                              |
| 122 | endiandrin A  |    | <i>Endiandra anthropophagorum</i><br>(roots)                         | $[\alpha]_D^{22} -51$ (c 0.19, CHCl <sub>3</sub> ) | 80                                              |
| 123 | endiandrin B  |   | <i>Endiandra anthropophagorum</i><br>(roots)                         | $[\alpha]_D^{27} 0$ (c 0.12, CHCl <sub>3</sub> )   | 81                                              |
| 124 | moslolignan A |  | <i>Mosla scabra</i> (flowering whole<br>plants)                      | $[\alpha]_D -0.15$ (c 1.63, CH <sub>3</sub> OH)    | 82                                              |

|      |                              |  |                                                 |                                                     |    |
|------|------------------------------|--|-------------------------------------------------|-----------------------------------------------------|----|
| 125  | moslolignan B                |  | <i>Mosla scabra</i> (flowering whole plants)    | $[\alpha]_D -0.43$ (c 1.38, CH <sub>3</sub> OH)     | 82 |
| 126  | 4,4'-dihydroxytruxillic acid |  | <i>Lolium multiflorum</i> (cell wall)           | —                                                   | 83 |
| 127  | anisumic acid                |  | <i>Clausena anisum-olens</i> (leaves and twigs) | $[\alpha]^{21.5}_D +13$ (c 2.0, CH <sub>3</sub> OH) | 84 |
| 128a | (+)-isatisycloneolignan A    |  | <i>Isatis indigotica</i> (leaves)               | $[\alpha]^{20}_D +30.3$ (c 0.1, CH <sub>3</sub> OH) | 85 |
| 128b | (-)-isatisycloneolignan A    |  | <i>Isatis indigotica</i> (leaves)               | $[\alpha]^{20}_D -29.0$ (c 0.1, CH <sub>3</sub> OH) | 85 |

|     |                                                                                                                                              |                                                                                      |                                                 |                                                              |    |
|-----|----------------------------------------------------------------------------------------------------------------------------------------------|--------------------------------------------------------------------------------------|-------------------------------------------------|--------------------------------------------------------------|----|
| 129 | methyl <i>rel</i> -(1 <i>R</i> ,2 <i>S</i> ,3 <i>S</i> )-2-(7-methoxy-1,3-benzodioxol-5-yl)-3-(2,4,5-trimethoxyphenyl)cyclobutanecarboxylate | 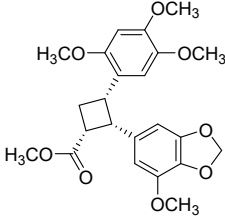   | <i>Peperomia tetraphylla</i> (whole plants)     | $[\alpha]_D^{20}$ 0 ( <i>c</i> 0.053, CHCl <sub>3</sub> )    | 86 |
| 130 | methyl <i>rel</i> -(1 <i>R</i> ,2 <i>R</i> ,3 <i>S</i> )-2-(7-methoxy-1,3-benzodioxol-5-yl)-3-(2,4,5-trimethoxyphenyl)cyclobutanecarboxylate |    | <i>Peperomia tetraphylla</i> (whole plants)     | $[\alpha]_D^{20}$ -10.5 ( <i>c</i> 0.01, CHCl <sub>3</sub> ) | 86 |
| 131 | pachypophyllin                                                                                                                               |    | <i>Pachypodanthium staudtii</i> (stem bark)     | $[\alpha]_D^{24}$ 0 ( <i>c</i> 0.8, CHCl <sub>3</sub> )      | 87 |
| 132 | lindleyanin                                                                                                                                  |   | <i>Pleurospermum lindleyanum</i> (whole plants) | $[\alpha]_D^{20}$ 0 ( <i>c</i> 0.065, CHCl <sub>3</sub> )    | 88 |
| 133 | melicodin C                                                                                                                                  |  | <i>Melicope denhamii</i> (leaves)               | $[\alpha]_D^{25}$ 0 ( <i>c</i> 0.1, CH <sub>3</sub> OH)      | 89 |

|     |                                                                                                                         |                                                                                     |                                                        |                                                                           |    |
|-----|-------------------------------------------------------------------------------------------------------------------------|-------------------------------------------------------------------------------------|--------------------------------------------------------|---------------------------------------------------------------------------|----|
| 134 | chokorin                                                                                                                | 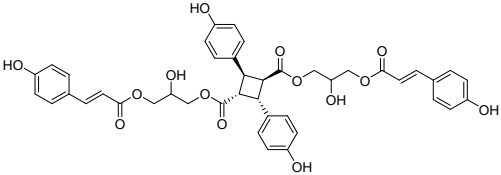  | <i>Phleum pratense</i> (timothy plants)                | [ $\alpha$ ] <sup>24</sup> <sub>D</sub> 0 (c 0.3, CH <sub>3</sub> OH)     | 90 |
| 135 | sagerinic acid                                                                                                          |   | <i>Salvia officinalis</i>                              | [ $\alpha$ ] <sup>20</sup> <sub>D</sub> +4.0 (c 0.2, CH <sub>3</sub> OH)  | 91 |
| 136 | (no trivial name given)                                                                                                 |   | <i>Cananga odorata</i> var. <i>odorata</i><br>(leaves) | [ $\alpha$ ] <sup>25</sup> <sub>D</sub> +17.5 (c 0.7, CH <sub>3</sub> OH) | 92 |
| 137 | 1 $\alpha$ ,3 $\beta$ -di(3,4-<br>dihydroxyphenyl)-2 $\alpha$ ,4 $\beta$ -<br>dibazzanenyl cyclobutane<br>dicarboxylate |  | <i>Bazzania pompeana</i>                               | —                                                                         | 93 |

|     |                                                 |  |                                             |                                                                                    |    |
|-----|-------------------------------------------------|--|---------------------------------------------|------------------------------------------------------------------------------------|----|
| 138 | 4,4'-dimethoxy-b-truxinic acid catalpol diester |  | <i>Premna subscandens</i> (leaves)          | [ $\alpha$ ] <sup>22</sup> <sub>D</sub> -71.9 ( <i>c</i> 1.77, CH <sub>3</sub> OH) | 94 |
| 139 | incarvillateine                                 |  | <i>Incarvillea sinensis</i> (aerial parts)  | —                                                                                  | 95 |
| 140 | methoxyincarvillateine                          |  | <i>Incarvillea sinensis</i> (aerial parts)  | [ $\alpha$ ] <sup>20</sup> <sub>D</sub> -4.0 ( <i>c</i> 0.61, CHCl <sub>3</sub> )  | 96 |
| 141 | sarusbine A                                     |  | <i>Lagerstroemia subcostata</i><br>(leaves) | [ $\alpha$ ] <sup>23</sup> <sub>D</sub> +40.1 ( <i>c</i> 1.0, CH <sub>3</sub> OH)  | 97 |

|     |                                                           |  |                                         |                                                                              |     |
|-----|-----------------------------------------------------------|--|-----------------------------------------|------------------------------------------------------------------------------|-----|
| 142 | dunalianoside H                                           |  | <i>Vaccinium dunalianum</i> (buds)      | [ $\alpha$ ] <sup>26</sup> <sub>D</sub> -37.2 (c 0.1, CH <sub>3</sub> OH)    | 98  |
| 143 | dodegranoside B                                           |  | <i>Dodecadenia grandiflora</i> (leaves) | [ $\alpha$ ] <sup>26</sup> <sub>D</sub> -35.27 (c 0.029, CH <sub>3</sub> OH) | 99  |
| 144 | $\beta$ -truxilloyl 6-O- $\beta$ -D-glucopyranose diester |  | <i>Petrorrhagia velutina</i> (leaves)   | [ $\alpha$ ] <sup>20</sup> <sub>D</sub> +9.56 (c 1.15, CH <sub>3</sub> OH)   | 100 |
| 145 | diinnovanoside A                                          |  | <i>Daphne aurantiaca</i> (stem bark)    | [ $\alpha$ ] <sup>20</sup> <sub>D</sub> -47 (c 0.12, CH <sub>3</sub> OH)     | 101 |
| 146 | diinnovanoside B                                          |  | <i>Daphne aurantiaca</i> (stem bark)    | [ $\alpha$ ] <sup>20</sup> <sub>D</sub> -48 (c 0.08, CH <sub>3</sub> OH)     | 101 |

|     |                  |  |                                            |                                                              |          |
|-----|------------------|--|--------------------------------------------|--------------------------------------------------------------|----------|
| 147 | tadehaginoside C |  | <i>Tadehagi triquetrum</i> (aerial parts)  | $[\alpha]^{25}_D -108$ ( <i>c</i> 0.03, CH <sub>3</sub> OH)  | 102      |
| 148 | tadehaginoside D |  | <i>Tadehagi triquetrum</i> (aerial parts)  | $[\alpha]^{25}_D -58.0$ ( <i>c</i> 0.1, CH <sub>3</sub> OH)  | 102      |
| 149 | stachysetin      |  | <i>Stachys aegyptiaca</i> (aerial parts)   | —                                                            | 103      |
| 150 | monochaetin      |  | <i>Monochaetum multiflorum</i><br>(leaves) | $[\alpha]^{20}_D +25.0$ ( <i>c</i> 0.1, CH <sub>3</sub> OH)  | 104, 105 |
| 151 | potentilin A     |  | <i>Potentilla anserine</i> (rhizomes)      | $[\alpha]^{25}_D +20.7$ ( <i>c</i> 0.05, CH <sub>3</sub> OH) | 106      |

|     |                |  |                                              |                                                                      |     |
|-----|----------------|--|----------------------------------------------|----------------------------------------------------------------------|-----|
| 152 | geniculatin    |  | <i>Paepalanthus geniculatus</i><br>(flowers) | $[\alpha]_{\text{D}}^{25} -7.4$ ( <i>c</i> 0.1, CH <sub>3</sub> OH)  | 107 |
| 153 | biginkgoside A |  | <i>Ginkgo biloba</i> (leaves)                | $[\alpha]_{\text{D}}^{20} -71.0$ ( <i>c</i> 0.2, CH <sub>3</sub> OH) | 108 |
| 154 | biginkgoside B |  | <i>Ginkgo biloba</i> (leaves)                | $[\alpha]_{\text{D}}^{20} -67.0$ ( <i>c</i> 0.2, CH <sub>3</sub> OH) | 108 |
| 155 | biginkgoside C |  | <i>Ginkgo biloba</i> (leaves)                | $[\alpha]_{\text{D}}^{20} -53.0$ ( <i>c</i> 0.1, CH <sub>3</sub> OH) | 108 |
| 156 | biginkgoside D |  | <i>Ginkgo biloba</i> (leaves)                | $[\alpha]_{\text{D}}^{20} -71.0$ ( <i>c</i> 0.1, CH <sub>3</sub> OH) | 108 |



|     |                |  |                               |                                                     |     |
|-----|----------------|--|-------------------------------|-----------------------------------------------------|-----|
| 157 | biginkgoside E |  | <i>Ginkgo biloba</i> (leaves) | $[\alpha]_D^{20} -58.0$ (c 0.1, CH <sub>3</sub> OH) | 108 |
| 158 | biginkgoside F |  | <i>Ginkgo biloba</i> (leaves) | $[\alpha]_D^{20} -65.0$ (c 0.1, CH <sub>3</sub> OH) | 108 |
| 159 | biginkgoside G |  | <i>Ginkgo biloba</i> (leaves) | $[\alpha]_D^{20} -52.0$ (c 0.2, CH <sub>3</sub> OH) | 108 |
| 160 | biginkgoside H |  | <i>Ginkgo biloba</i> (leaves) | $[\alpha]_D^{20} -75.0$ (c 0.2, CH <sub>3</sub> OH) | 108 |
| 161 | biginkgoside I |  | <i>Ginkgo biloba</i> (leaves) | $[\alpha]_D^{20} -49.0$ (c 0.1, CH <sub>3</sub> OH) | 108 |

|     |                 |  |                                        |                                                             |     |
|-----|-----------------|--|----------------------------------------|-------------------------------------------------------------|-----|
| 162 | cinnamomoside A |  | <i>Cinnamomum cassia</i> (twigs)       | $[\alpha]_D^{25} +4.0$ ( <i>c</i> 1.4, CH <sub>3</sub> OH)  | 109 |
| 163 | palhinoside A   |  | <i>Palhinhaea cernua</i> (whole herbs) | $[\alpha]_D^{25} -16.0$ ( <i>c</i> 0.1, CH <sub>3</sub> OH) | 110 |
| 164 | palhinoside B   |  | <i>Palhinhaea cernua</i> (whole herbs) | $[\alpha]_D^{25} -27.0$ ( <i>c</i> 0.1, CH <sub>3</sub> OH) | 110 |
| 165 | palhinoside C   |  | <i>Palhinhaea cernua</i> (whole herbs) | $[\alpha]_D^{25} -27.0$ ( <i>c</i> 0.1, CH <sub>3</sub> OH) | 110 |
| 166 | palhinoside D   |  | <i>Palhinhaea cernua</i> (whole herbs) | $[\alpha]_D^{25} -54.0$ ( <i>c</i> 0.1, CH <sub>3</sub> OH) | 110 |
| 167 | palhinoside E   |  | <i>Palhinhaea cernua</i> (whole herbs) | $[\alpha]_D^{25} -31.0$ ( <i>c</i> 0.1, CH <sub>3</sub> OH) | 110 |

|     |               |                                                                                     |                                                  |                                                                 |     |
|-----|---------------|-------------------------------------------------------------------------------------|--------------------------------------------------|-----------------------------------------------------------------|-----|
| 168 | palhinoside F | 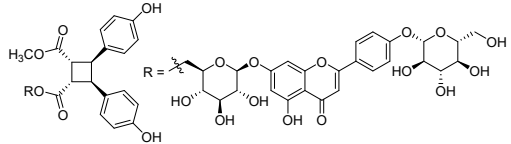  | <i>Palhinhaea cernua</i> (whole herbs)           | $[\alpha]_{D}^{25} -28.0$ (c 0.1, CH <sub>3</sub> OH)           | 110 |
| 169 | palhinoside G |   | <i>Palhinhaea cernua</i> (whole herbs)           | $[\alpha]_{D}^{25} -61.0$ (c 0.1, CH <sub>3</sub> OH)           | 110 |
| 170 | palhinoside H |   | <i>Palhinhaea cernua</i> (whole herbs)           | $[\alpha]_{D}^{25} -26.0$ (c 0.2, CH <sub>3</sub> OH)           | 110 |
| 171 | itoside N     |   | <i>Itoa orientalis</i> (bark, twigs, and leaves) | $[\alpha]_{D}^{25} +10.0$ (c 0.06, CH <sub>3</sub> OH)          | 111 |
| 172 | achyrodimer A |  | <i>Achyrocline bogotensis</i> (aerial parts)     | $[\alpha]_{D} 0$ (c 0.9, CH <sub>3</sub> OH-CHCl <sub>3</sub> ) | 112 |

|     |               |                                                                                     |                                              |                                                          |     |
|-----|---------------|-------------------------------------------------------------------------------------|----------------------------------------------|----------------------------------------------------------|-----|
| 173 | achyrodimer B | 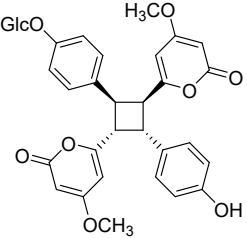  | <i>Achyrocline bogotensis</i> (aerial parts) | $[\alpha]_D -25.0$ ( <i>c</i> 0.9, CH <sub>3</sub> OH)   | 112 |
| 174 | achyrodimer C |   | <i>Achyrocline bogotensis</i> (aerial parts) | $[\alpha]_D -32.2$ ( <i>c</i> 1.7, CH <sub>3</sub> OH)   | 112 |
| 175 | diyangonin A  |   | <i>Piper methysticum</i> (roots)             | $[\alpha]^{25}_D 0$ ( <i>c</i> 0.1, CH <sub>3</sub> OH)  | 113 |
| 176 | diyangonin B  |  | <i>Piper methysticum</i> (roots)             | $[\alpha]^{25}_D +2$ ( <i>c</i> 0.1, CH <sub>3</sub> OH) | 113 |

|     |                                                                                                                 |  |                                  |                                                                                      |     |
|-----|-----------------------------------------------------------------------------------------------------------------|--|----------------------------------|--------------------------------------------------------------------------------------|-----|
| 177 | diyangonin C                                                                                                    |  | <i>Piper methysticum</i> (roots) | $[\alpha]^{25}_D +1$ ( <i>c</i> 0.1, CH <sub>3</sub> OH)                             | 113 |
| 178 | <i>rel</i> -, <i>trans</i> -3-bis[6-(4-methoxy-2-pyronyl)]- <i>cis</i> -2, <i>trans</i> -4-diphenyl cyclobutane |  | <i>Piper methysticum</i> (roots) | —                                                                                    | 113 |
| 179 | 6,6'-(3,4-diphenylcyclobutane-1,2-diyl)bis(4-methoxy-2 <i>H</i> -pyran-2-one)                                   |  | <i>Piper methysticum</i> (roots) | —                                                                                    | 113 |
| 180 | velutinindimer A                                                                                                |  | <i>Milium velutinum</i> (leaves) | $[\alpha]^{28}_D +0.08$ ( <i>c</i> 0.63, CH <sub>3</sub> OH-CHCl <sub>3</sub> , 3:1) | 114 |

|     |               |  |                                                            |                                                                                                                |     |
|-----|---------------|--|------------------------------------------------------------|----------------------------------------------------------------------------------------------------------------|-----|
| 181 | achyrodimer F |  | teleomorphic fungus of the family<br><i>Cortinariaceae</i> | —                                                                                                              | 115 |
| 182 | katsumadain C |  | <i>Alpinia katsumadai</i> (seed)                           | [ $\alpha$ ] <sup>28</sup> <sub>D</sub> +173.2 ( <i>c</i> 0.05,<br>CHCl <sub>3</sub> –CH <sub>3</sub> OH, 1:1) | 116 |
| 183 | achyrodimer D |  | <i>Achyrocline bogotensis</i> (aerial<br>parts)            | [ $\alpha$ ] <sub>D</sub> +27 ( <i>c</i> 1.5,<br>CHCl <sub>3</sub> –CH <sub>3</sub> OH)                        | 112 |
| 184 | achyrodimer E |  | <i>Achyrocline bogotensis</i> (aerial<br>parts)            | [ $\alpha$ ] <sub>D</sub> +58.1 ( <i>c</i> 0.7, CH <sub>3</sub> OH)                                            | 112 |

|     |                 |  |                                  |                                                  |         |
|-----|-----------------|--|----------------------------------|--------------------------------------------------|---------|
| 185 | yangonindimer A |  | <i>Piper methysticum</i> (roots) | $[\alpha]_D^{25} +8$ (c 0.1, CH <sub>3</sub> OH) | 117     |
| 186 | yangonindimer B |  | <i>Piper methysticum</i> (roots) | $[\alpha]_D^{25} +9$ (c 0.1, CH <sub>3</sub> OH) | 117     |
| 187 | yangonindimer C |  | <i>Piper methysticum</i> (roots) | $[\alpha]_D^{25} +8$ (c 0.1, CH <sub>3</sub> OH) | 117     |
| 188 | aniba dimer A   |  | <i>Aniba gurdneri</i> (leaves)   | $[\alpha]_D 0$ (c 0.21, CH <sub>3</sub> OH)      | 118-120 |

|     |                  |  |                                     |                                                                                         |     |
|-----|------------------|--|-------------------------------------|-----------------------------------------------------------------------------------------|-----|
| 189 | velutinindimer B |  | <i>Milusa velutina</i> (leaves)     | $[\alpha]^{28}_D +0.08$ ( <i>c</i> 0.63,<br>CH <sub>3</sub> OH–CHCl <sub>3</sub> , 5:3) | 114 |
| 190 | velutinindimer C |  | <i>Milusa velutina</i> (leaves)     | $[\alpha]^{27}_D +0.03$ ( <i>c</i> 0.23,<br>CH <sub>3</sub> OH–CHCl <sub>3</sub> , 9:1) | 114 |
| 191 | kavalactone A    |  | <i>Piper methysticum</i> (leaves)   | $[\alpha]^{25}_D +4$ ( <i>c</i> 0.049, CH <sub>3</sub> OH)                              | 121 |
| 192 | aniba dimer C    |  | <i>Alpinia zerumbet</i> (pericarps) | $[\alpha]^{25}_D 0$ ( <i>c</i> 0.1, CHCl <sub>3</sub> )                                 | 122 |



|      |                      |                                                                                      |                                  |                                                              |     |
|------|----------------------|--------------------------------------------------------------------------------------|----------------------------------|--------------------------------------------------------------|-----|
| 193  | angesinenolide A     | 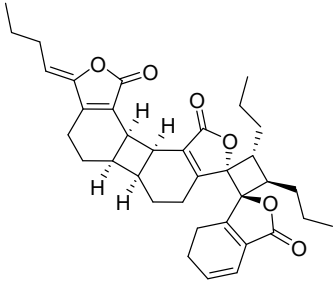   | <i>Angelica sinensis</i> (roots) | $[\alpha]_{\text{D}}^{25} +6$ (c 0.1, CH <sub>3</sub> OH)    | 123 |
| 194a | (–)-triligustilide A |    | <i>Angelica sinensis</i> (roots) | $[\alpha]_{\text{D}}^{27} -78.6$ (c 0.5, CHCl <sub>3</sub> ) | 124 |
| 194b | (+)–triligustilide A |   | <i>Angelica sinensis</i> (roots) | $[\alpha]_{\text{D}}^{27} +77.0$ (c 0.5, CHCl <sub>3</sub> ) | 124 |
| 195a | (–)-triligustilide B |  | <i>Angelica sinensis</i> (roots) | $[\alpha]_{\text{D}}^{27} -36.5$ (c 0.5, CHCl <sub>3</sub> ) | 124 |

|             |                          |                                                                                      |                                  |                                                               |     |
|-------------|--------------------------|--------------------------------------------------------------------------------------|----------------------------------|---------------------------------------------------------------|-----|
| <b>195b</b> | (+) -triligustilide B    | 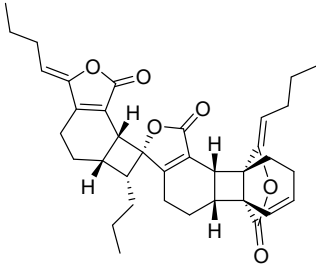   | <i>Angelica sinensis</i> (roots) | $[\alpha]_{\text{D}}^{27} +39.0$ (c 0.5, CHCl <sub>3</sub> )  | 124 |
| <b>196a</b> | (+) -triangelipthalide A |    | <i>Angelica sinensis</i> (roots) | $[\alpha]_{\text{D}}^{27} +125.2$ (c 0.5, CHCl <sub>3</sub> ) | 125 |
| <b>196b</b> | (−) -triangelipthalide A |   | <i>Angelica sinensis</i> (roots) | $[\alpha]_{\text{D}}^{27} -115.8$ (c 0.5, CHCl <sub>3</sub> ) | 125 |
| <b>197a</b> | (+) -triangelipthalide B |  | <i>Angelica sinensis</i> (roots) | $[\alpha]_{\text{D}}^{27} +158.2$ (c 0.5, CHCl <sub>3</sub> ) | 125 |

|             |                          |                                                                                     |                                  |                                                      |     |
|-------------|--------------------------|-------------------------------------------------------------------------------------|----------------------------------|------------------------------------------------------|-----|
| <b>197b</b> | (-)-triangelipthalide B  | 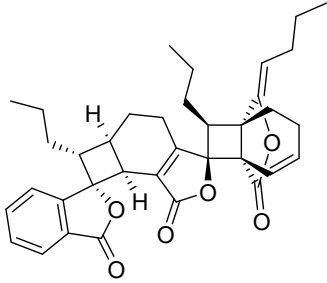  | <i>Angelica sinensis</i> (roots) | $[\alpha]_D^{27} -164.0$ (c 0.5, CHCl <sub>3</sub> ) | 125 |
| <b>198a</b> | (-)-triangelipthalide C  |   | <i>Angelica sinensis</i> (roots) | $[\alpha]_D^{27} -56.5$ (c 0.5, CHCl <sub>3</sub> )  | 125 |
| <b>198b</b> | (+) -triangelipthalide C |   | <i>Angelica sinensis</i> (roots) | $[\alpha]_D^{27} +58.8$ (c 0.5, CHCl <sub>3</sub> )  | 125 |
| <b>199a</b> | (+) -triangelipthalide D |  | <i>Angelica sinensis</i> (roots) | $[\alpha]_D^{27} +69.8$ (c 0.5, CHCl <sub>3</sub> )  | 125 |

|             |                         |                                                                                      |                                   |                                                     |     |
|-------------|-------------------------|--------------------------------------------------------------------------------------|-----------------------------------|-----------------------------------------------------|-----|
| <b>199b</b> | (-)-triangelipthalide D | 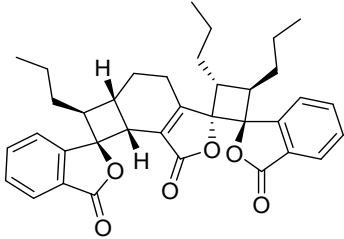   | <i>Angelica sinensis</i> (roots)  | $[\alpha]_D^{27} -72.5$ (c 0.5, CHCl <sub>3</sub> ) | 125 |
| <b>200a</b> | (-)-riligustilide       |    | <i>Angelica sinensis</i> (roots)  | $[\alpha]_D^{27} -89.6$ (c 0.5, CHCl <sub>3</sub> ) | 124 |
| <b>200b</b> | (+)-riligustilide       |    | <i>Angelica sinensis</i> (roots)  | $[\alpha]_D^{27} +92.2$ (c 0.5, CHCl <sub>3</sub> ) | 124 |
| <b>201a</b> | (+)-tokinolide A        |   | <i>Angelicae Sinensis</i> (roots) | $[\alpha]_D^{27} +60.8$ (c 0.5, CHCl <sub>3</sub> ) | 124 |
| <b>201b</b> | (-)-tokinolide A        |  | <i>Angelicae Sinensis</i> (roots) | $[\alpha]_D^{27} -58.0$ (c 0.5, CHCl <sub>3</sub> ) | 124 |

|      |                         |                                                                                      |                                                                      |                                                             |          |
|------|-------------------------|--------------------------------------------------------------------------------------|----------------------------------------------------------------------|-------------------------------------------------------------|----------|
| 202a | (-)-diangelipthalide A  | 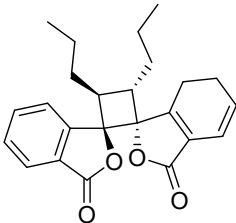   | <i>Angelica sinensis</i> (roots)                                     | $[\alpha]_D^{27} -43.8$ ( <i>c</i> 0.3, CHCl <sub>3</sub> ) | 125      |
| 202b | (+) -diangelipthalide A |    | <i>Angelica sinensis</i> (roots)                                     | $[\alpha]_D^{27} +42.0$ ( <i>c</i> 0.3, CHCl <sub>3</sub> ) | 125      |
| 203a | (-)-gelispirolide       |    | <i>Angelica sinensis</i> (roots)                                     | $[\alpha]_D^{27} -59.2$ ( <i>c</i> 1.0, CHCl <sub>3</sub> ) | 125      |
| 203b | (+) -gelispirolide      |   | <i>Angelica sinensis</i> (roots)                                     | $[\alpha]_D^{27} +61.9$ ( <i>c</i> 1.0, CHCl <sub>3</sub> ) | 125      |
| 204  | angelicolide            |  | <i>Angelica ylauca</i> (roots)<br><i>Angelica sinensis</i> (rhizome) | —                                                           | 126, 127 |

|     |                                |                                                                                     |                                   |                                                                                    |     |
|-----|--------------------------------|-------------------------------------------------------------------------------------|-----------------------------------|------------------------------------------------------------------------------------|-----|
| 205 | Z,Z'-3.3'a,7.7'a-diligustilide | 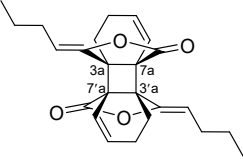  | <i>Angelica sinensis</i> (roots)  | —                                                                                  | 128 |
| 206 | sinaspirolide                  |    | <i>Angelica sinensis</i> (roots)  | $[\alpha]^{20}_{\text{D}} +24.0$ ( <i>c</i> 0.1, CH <sub>2</sub> Cl <sub>2</sub> ) | 129 |
| 207 | neodiligustilide               |    | <i>Angelica sinensis</i> (roots)  | $[\alpha]^{20}_{\text{D}} +14.0$ ( <i>c</i> 0.1, CHCl <sub>3</sub> )               | 130 |
| 208 | 3,3'Z-6.7', 7.6'diligustilide  |   | <i>Angelica sinensis</i> (roots)  | $[\alpha]^{20}_{\text{D}} 0$ ( <i>c</i> 0.1, CHCl <sub>3</sub> )                   | 131 |
| 209 | tokiaerialide                  |  | <i>Angelica acutiloba</i> (roots) | $[\alpha]^{25}_{\text{D}} -21.0$ ( <i>c</i> 0.15, CHCl <sub>3</sub> )              | 132 |

|     |                                                            |                                                                                      |                                    |   |     |
|-----|------------------------------------------------------------|--------------------------------------------------------------------------------------|------------------------------------|---|-----|
| 210 | tokinolide C                                               | 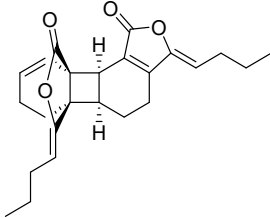   | <i>Angelicae sinensis</i> (roots)  | — | 133 |
| 211 | <i>cis</i> - <i>Z,Z'</i> -3a,7a',7a,3a'-dihydroxygustilide |    | <i>Angelicae sinensis</i> (roots)  | — | 134 |
| 212 | <i>Z,Z'</i> -6,8',7,3'-diligustilide                       |    | <i>Angelica sinensis</i> (rhizome) | — | 135 |
| 213 | angelicide                                                 |   | <i>Angelica sinensis</i> (rhizome) | — | 135 |
| 214 | <i>Z,Z'</i> -3,3',8,8'-diligustilide                       |  | <i>Angelica sinensis</i> (rhizome) | — | 135 |

215 (no trivial name given)

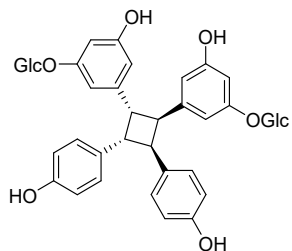

*Polygonum cuspidatum* (roots)

$[\alpha]_{\text{D}}^{25} -160.2$  (*c* 0.21, CH<sub>3</sub>OH)

136

216 multiflorumiside A

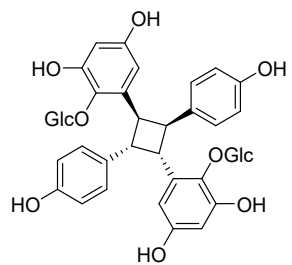

*Polygonum multiflorum* (roots)

$[\alpha]_{\text{D}}^{20} +6$  (*c* 0.5, CH<sub>3</sub>OH)

137

217 multiflorumiside B

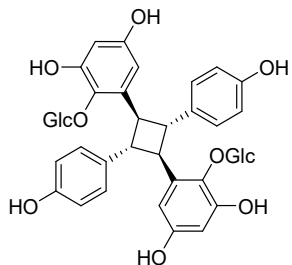

*Polygonum multiflorum* (roots)

$[\alpha]_{\text{D}}^{20} +16$  (*c* 0.5, CH<sub>3</sub>OH)

137

218 multiflorumiside C

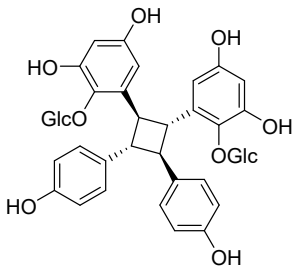

*Polygonum multiflorum* (roots)

$[\alpha]_{\text{D}}^{20} -9$  (*c* 0.5, CH<sub>3</sub>OH)

137



|      |                    |  |                                      |                                                                       |     |
|------|--------------------|--|--------------------------------------|-----------------------------------------------------------------------|-----|
| 219  | multiflorumiside D |  | <i>Polygonum multiflorum</i> (roots) | $[\alpha]^{20}_{\text{D}} +14$ ( <i>c</i> 0.5, CH <sub>3</sub> OH)    | 137 |
| 220  | cajanstilbenoid A  |  | <i>Cajanus cajan</i> (leaves)        | $[\alpha]^{20}_{\text{D}} 0$ ( <i>c</i> 0.49, CH <sub>3</sub> OH)     | 138 |
| 221  | cajanstilbenoid B  |  | <i>Cajanus cajan</i> (leaves)        | $[\alpha]^{20}_{\text{D}} 0$ ( <i>c</i> 0.053, CH <sub>3</sub> OH)    | 138 |
| 222a | (+) -cajanusine    |  | <i>Cajanus cajan</i> (leaves)        | $[\alpha]^{25}_{\text{D}} +220.6$ ( <i>c</i> 0.3, CH <sub>3</sub> OH) | 139 |

|      |                |                                                                                      |                                      |                                                         |     |
|------|----------------|--------------------------------------------------------------------------------------|--------------------------------------|---------------------------------------------------------|-----|
| 222b | (-)-cajanusine | 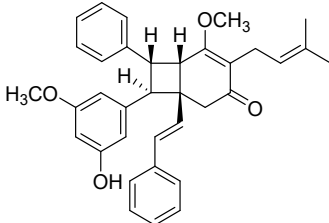   | <i>Cajanus cajan</i> (leaves)        | $[\alpha]_{D}^{20} -222.0$ (c 0.3, CH <sub>3</sub> OH)  | 139 |
| 223  | simmonsoside A |    | <i>Simmondsia chinensis</i> (leaves) | $[\alpha]_{D}^{23} -136.3$ (c 0.15, CH <sub>3</sub> OH) | 140 |
| 224  | simmonsoside B |    | <i>Simmondsia chinensis</i> (leaves) | $[\alpha]_{D}^{23} -165.2$ (c 0.15, CH <sub>3</sub> OH) | 140 |
| 225  | melicodenine C |   | <i>Melicope denhamii</i> (leaves)    | $[\alpha]_{D}^{25} 0$ (c 0.1, CH <sub>3</sub> OH)       | 89  |
| 226  | melicodenine D |  | <i>Melicope denhamii</i> (leaves)    | $[\alpha]_{D}^{25} 0$ (c 0.1, CH <sub>3</sub> OH)       | 89  |

|     |                |                                                                                      |                                   |                                                     |     |
|-----|----------------|--------------------------------------------------------------------------------------|-----------------------------------|-----------------------------------------------------|-----|
| 227 | melicodenine E | 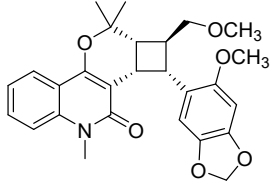   | <i>Melicope denhamii</i> (leaves) | $[\alpha]_{D}^{25} 0$ (c 0.1, CH <sub>3</sub> OH)   | 89  |
| 228 | melicodenine F |    | <i>Melicope denhamii</i> (leaves) | $[\alpha]_{D}^{25} 0$ (c 0.1, CH <sub>3</sub> OH)   | 89  |
| 229 | melicodenine G |    | <i>Melicope denhamii</i> (leaves) | $[\alpha]_{D}^{25} 0$ (c 0.1, CH <sub>3</sub> OH)   | 89  |
| 230 | euodenine A    |   | <i>Euodia asteridula</i> (leaves) | optically inactive                                  | 141 |
| 231 | pulchralide A  |  | <i>Delisea pulchra</i>            | $[\alpha]_{D}^{25} +6$ (c 0.25, CHCl <sub>3</sub> ) | 142 |

|     |                                     |                                                                                      |                                |                                                              |          |
|-----|-------------------------------------|--------------------------------------------------------------------------------------|--------------------------------|--------------------------------------------------------------|----------|
| 232 | pulchralide B                       | 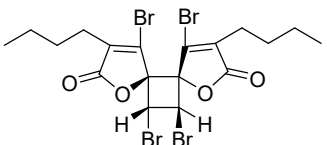   | <i>Delisea pulchra</i>         | $[\alpha]_D^{25} +4.3$ ( <i>c</i> 0.06, CHCl <sub>3</sub> )  | 142      |
| 233 | pulchralide C                       |    | <i>Delisea pulchra</i>         | $[\alpha]_D^{25} +11.6$ ( <i>c</i> 0.06, CHCl <sub>3</sub> ) | 142      |
| 234 | acetoxyfimbrolide C2 dimer          |    | <i>Delisea elegans</i>         | —                                                            | 142, 143 |
| 235 | acetoxyfimbrolide <i>meso</i> dimer |    | <i>Delisea elegans</i>         | —                                                            | 142, 143 |
| 236 | (no trivial name given)             |   | <i>Delisea elegans</i>         | —                                                            | 143      |
| 237 | dipleosporalone A                   |  | <i>Pleosporales</i> sp. CF09-1 | $[\alpha]_D^{20} +160$ ( <i>c</i> 1.0, CH <sub>3</sub> OH)   | 144      |

|      |                   |                                                                                      |                                |                                                             |     |
|------|-------------------|--------------------------------------------------------------------------------------|--------------------------------|-------------------------------------------------------------|-----|
| 238  | dipleosporalone B | 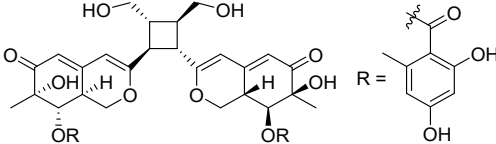   | <i>Pleosporales</i> sp. CF09-1 | $[\alpha]^{20}_D +62$ ( <i>c</i> 1.0, CH <sub>3</sub> OH)   | 144 |
| 239  | diasteltoxin A    |    | <i>Emericella varicolor</i>    | $[\alpha]^{20}_D +3.3$ ( <i>c</i> 0.3, CH <sub>3</sub> OH)  | 145 |
| 240  | diasteltoxin B    |    | <i>Emericella varicolor</i>    | $[\alpha]^{20}_D +12.0$ ( <i>c</i> 0.3, CH <sub>3</sub> OH) | 145 |
| 241  | diasteltoxin C    |   | <i>Emericella varicolor</i>    | $[\alpha]^{20}_D +4.5$ ( <i>c</i> 0.2, CH <sub>3</sub> OH)  | 145 |
| 242a | (+) - phomone A   |  | <i>Phoma</i> sp. YN02-P-3      | $[\alpha]^{20}_D +30.0$ ( <i>c</i> 0.2, CH <sub>3</sub> OH) | 146 |

|      |                                                                |  |                                                 |                                                             |     |
|------|----------------------------------------------------------------|--|-------------------------------------------------|-------------------------------------------------------------|-----|
| 242b | (-)-phomone A                                                  |  | <i>Phoma</i> sp. YN02-P-3                       | $[\alpha]_D^{20} -39.0$ ( <i>c</i> 0.2, CH <sub>3</sub> OH) | 146 |
| 243a | 5 <i>S</i> , 6 <i>S</i> , 7' <i>R</i> , 8' <i>R</i> -phomone B |  | <i>Phoma</i> sp. YN02-P-3                       | —                                                           | 146 |
| 243b | 5 <i>R</i> , 6 <i>R</i> , 7' <i>S</i> , 8' <i>S</i> -phomone B |  | <i>Phoma</i> sp. YN02-P-3                       | —                                                           | 146 |
| 244  | rhododaurichromanic acid A                                     |  | <i>Rhododendron dauricum</i> (leaves and twigs) | $[\alpha]_D +25.8$ ( <i>c</i> 0.36, CHCl <sub>3</sub> )     | 147 |
| 245  | rhododaurichromanic acid B                                     |  | <i>Rhododendron dauricum</i> (leaves and twigs) | $[\alpha]_D -118.2$ ( <i>c</i> 0.33, CHCl <sub>3</sub> )    | 147 |

|      |                        |                                                                                      |                                                           |                                                              |                                                   |
|------|------------------------|--------------------------------------------------------------------------------------|-----------------------------------------------------------|--------------------------------------------------------------|---------------------------------------------------|
| 246  | anthopogochromane      | 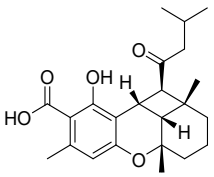   | <i>Rhododendron anthopogonoides</i><br>(leaves and twigs) | $[\alpha]^{23}_D -166.3$ ( <i>c</i> 1.0, CH <sub>3</sub> OH) | original <sup>148</sup><br>revised <sup>149</sup> |
| 247  | anthopogocyclolic acid |    | <i>Rhododendron anthopogonoides</i><br>(leaves and twigs) | $[\alpha]^{23}_D +16.7$ ( <i>c</i> 1.0, CH <sub>3</sub> OH)  | 150                                               |
| 248  | rubiginosin B          |    | <i>Rhododendron rubiginosum</i><br>(flower)               | $[\alpha]^{25}_D -89.1$ ( <i>c</i> 0.11, CH <sub>3</sub> OH) | 151                                               |
| 249  | rubiginosin C          |    | <i>Rhododendron rubiginosum</i><br>(flower)               | $[\alpha]^{25}_D -35.0$ ( <i>c</i> 0.1, CH <sub>3</sub> OH)  | 151                                               |
| 250  | rubiginosin G          |    | <i>Rhododendron rubiginosum</i><br>(flower)               | $[\alpha]^{25}_D +1.3$ ( <i>c</i> 0.05, CH <sub>3</sub> OH)  | 151, 152                                          |
| 251a | (-)-rhodonoid A        |  | <i>Rhododendron capitatum</i> (aerial parts)              | $[\alpha]^{20}_D -39.0$ ( <i>c</i> 0.1, CH <sub>3</sub> OH)  | 153                                               |
| 251b | (+)-rhodonoid A        |  | <i>Rhododendron capitatum</i> (aerial parts)              | $[\alpha]^{20}_D +38.0$ ( <i>c</i> 0.1, CH <sub>3</sub> OH)  | 153                                               |

|             |                 |  |                                              |                                                      |     |
|-------------|-----------------|--|----------------------------------------------|------------------------------------------------------|-----|
| <b>252a</b> | (-)-rhodonoid B |  | <i>Rhododendron capitatum</i> (aerial parts) | $[\alpha]_D^{20} -39.0$ (c 0.1, CH <sub>3</sub> OH)  | 153 |
| <b>252b</b> | (+)–rhodonoid B |  | <i>Rhododendron capitatum</i> (aerial parts) | $[\alpha]_D^{20} +42.0$ (c 0.1, CH <sub>3</sub> OH)  | 153 |
| <b>253a</b> | (+)–rhodonoid E |  | <i>Rhododendron capitatum</i> (aerial parts) | $[\alpha]_D^{20} +23.1$ (c 0.09, CH <sub>3</sub> OH) | 154 |
| <b>253b</b> | (-)-rhodonoid E |  | <i>Rhododendron capitatum</i> (aerial parts) | $[\alpha]_D^{20} -21.7$ (c 0.03, CH <sub>3</sub> OH) | 154 |



|             |                    |  |                                                 |                                                                            |     |
|-------------|--------------------|--|-------------------------------------------------|----------------------------------------------------------------------------|-----|
| <b>254a</b> | (+)–rhodonoid F    |  | <i>Rhododendron capitatum</i> (aerial parts)    | [ $\alpha$ ] <sub>D</sub> <sup>20</sup> +19.5 (c 0.07, CH <sub>3</sub> OH) | 154 |
| <b>254b</b> | (–)-rhodonoid F    |  | <i>Rhododendron capitatum</i> (aerial parts)    | [ $\alpha$ ] <sub>D</sub> <sup>20</sup> –18.3 (c 0.02, CH <sub>3</sub> OH) | 154 |
| <b>255a</b> | (–)-nyingchinoid D |  | <i>Rhododendron nyingchiense</i> (aerial parts) | [ $\alpha$ ] <sub>D</sub> <sup>25</sup> –15.6 (c 0.1, CH <sub>3</sub> OH)  | 155 |
| <b>255b</b> | (+)–nyingchinoid D |  | <i>Rhododendron nyingchiense</i> (aerial parts) | [ $\alpha$ ] <sub>D</sub> <sup>25</sup> +15.2 (c 0.1, CH <sub>3</sub> OH)  | 155 |
| <b>256a</b> | (+)–fastinoid A    |  | <i>Rhododendron fastigiatum</i> (aerial parts)  | [ $\alpha$ ] <sub>D</sub> <sup>25</sup> +15.6 (c 0.1, CH <sub>3</sub> OH)  | 156 |

|             |                  |                                                                                    |                                                |                                                                      |     |
|-------------|------------------|------------------------------------------------------------------------------------|------------------------------------------------|----------------------------------------------------------------------|-----|
| <b>256b</b> | (-)-fastinoid A  | 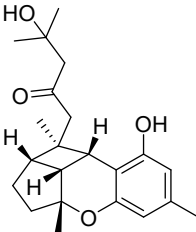  | <i>Rhododendron fastigiatum</i> (aerial parts) | $[\alpha]_{\text{D}}^{25} -15.2$ ( <i>c</i> 0.1, CH <sub>3</sub> OH) | 156 |
| <b>257a</b> | (+) -fastinoid B |   | <i>Rhododendron fastigiatum</i> (aerial parts) | $[\alpha]_{\text{D}}^{25} +16.5$ ( <i>c</i> 0.1, CH <sub>3</sub> OH) | 156 |
| <b>257b</b> | (-)-fastinoid B  |   | <i>Rhododendron fastigiatum</i> (aerial parts) | $[\alpha]_{\text{D}}^{25} -16.3$ ( <i>c</i> 0.1, CH <sub>3</sub> OH) | 156 |
| <b>258a</b> | (+) -fastinoid C |  | <i>Rhododendron fastigiatum</i> (aerial parts) | $[\alpha]_{\text{D}}^{25} +13.5$ ( <i>c</i> 0.1, CH <sub>3</sub> OH) | 156 |

|             |                   |                                                                                      |                                                                                             |                                                     |          |
|-------------|-------------------|--------------------------------------------------------------------------------------|---------------------------------------------------------------------------------------------|-----------------------------------------------------|----------|
| <b>258b</b> | (-)-fastinoid C   | 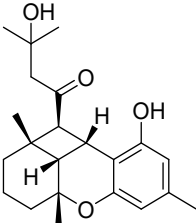    | <i>Rhododendron fastigiatum</i> (aerial parts)                                              | $[\alpha]_D^{25} -13.4$ (c 0.1, CH <sub>3</sub> OH) | 156      |
| <b>259a</b> | (+)-rubiginosin A |     | <i>Rhododendron rubiginosum</i> (flowers)<br><i>Rhododendron fastigiatum</i> (aerial parts) | $[\alpha]_D^{25} +36.7$ (c 0.1, CH <sub>3</sub> OH) | 151, 156 |
| <b>259b</b> | (-)-rubiginosin A |     | <i>Rhododendron fastigiatum</i> (aerial parts)                                              | $[\alpha]_D^{25} -36.0$ (c 0.1, CH <sub>3</sub> OH) | 156      |
| <b>260a</b> | (-)-anthoponoid B |   | <i>Rhododendron anthopogonoides</i> (twigs and leaves)                                      | $[\alpha]_D^{25} -59.0$ (c 0.1, CH <sub>3</sub> OH) | 157      |
| <b>260b</b> | (+)-anthoponoid B |  | <i>Rhododendron anthopogonoides</i> (twigs and leaves)                                      | $[\alpha]_D^{25} +60.0$ (c 0.1, CH <sub>3</sub> OH) | 157      |

|             |                    |  |                                                           |                                                     |     |
|-------------|--------------------|--|-----------------------------------------------------------|-----------------------------------------------------|-----|
| <b>261a</b> | (-)-anthoponoid C  |  | <i>Rhododendron anthopogonoides</i><br>(twigs and leaves) | $[\alpha]_{25}^D -58.0$ (c 0.1, CH <sub>3</sub> OH) | 157 |
| <b>261b</b> | (+) -anthoponoid C |  | <i>Rhododendron anthopogonoides</i><br>(twigs and leaves) | $[\alpha]_{25}^D +58.0$ (c 0.1, CH <sub>3</sub> OH) | 157 |
| <b>262a</b> | (+) -anthoponoid D |  | <i>Rhododendron anthopogonoides</i><br>(twigs and leaves) | $[\alpha]_{25}^D +21.5$ (c 0.1, CH <sub>3</sub> OH) | 157 |
| <b>262b</b> | (-)-anthoponoid D  |  | <i>Rhododendron anthopogonoides</i><br>(twigs and leaves) | $[\alpha]_{25}^D -21.0$ (c 0.1, CH <sub>3</sub> OH) | 157 |

|     |                           |                                                                                      |                                                                        |                                                      |          |
|-----|---------------------------|--------------------------------------------------------------------------------------|------------------------------------------------------------------------|------------------------------------------------------|----------|
| 263 | cannabiorcycloclol        | 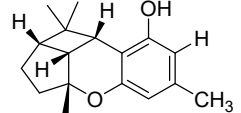   | <i>Cannabis sativa</i>                                                 | —                                                    | 158      |
| 264 | cannabiorcycloclolic acid |    | <i>Cannabis sativa</i> /<br><i>Rhododendron anthopogon</i><br>(leaves) | —                                                    | 150, 158 |
| 265 | cannabicyclovarin         |    | <i>Cannabis sativa</i>                                                 | $[\alpha]_D 0$ (c 0.25, CHCl <sub>3</sub> )          | 159, 160 |
| 266 | cannabicycloclol (CBL)    |    | <i>Cannabis sativa</i>                                                 | —                                                    | 161      |
| 267 | cannabicycloclolic acid   |    | <i>Cannabis sativa</i>                                                 | $[\alpha]^{16}_D 0$ (c 0.33, CHCl <sub>3</sub> )     | 162      |
| 268 | gaditanone                |    | <i>Euphorbia gaditana</i> (aerial parts)                               | $[\alpha]^{20}_D -17.0$ (c 0.12, CHCl <sub>3</sub> ) | 163      |
| 269 | heliosterpenoid A         |   | <i>Euphorbia helioscopia</i> (whole plants)                            | $[\alpha]^{20}_D +82.1$ (c 0.1, CH <sub>3</sub> OH)  | 164      |
| 270 | heliosterpenoid B         |  | <i>Euphorbia helioscopia</i> (whole plants)                            | $[\alpha]^{20}_D +41.3$ (c 0.1, CH <sub>3</sub> OH)  | 164      |

|     |                                |                                                                                     |                                             |                                                       |     |
|-----|--------------------------------|-------------------------------------------------------------------------------------|---------------------------------------------|-------------------------------------------------------|-----|
| 271 | jatropha factor C <sub>3</sub> | 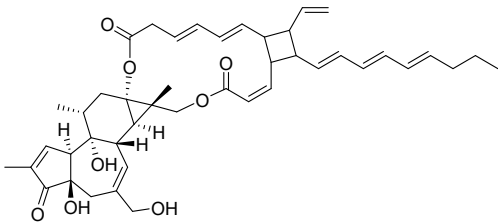  | <i>Jatropha curcas</i> (seed oil)           | $[\alpha]_D^{20} +130.0$ (c 0.07, CH <sub>3</sub> OH) | 165 |
| 272 | jatropha factor C <sub>6</sub> |   | <i>Jatropha curcas</i> (seed oil)           | $[\alpha]_D^{20} +69.3$ (c 0.14, CH <sub>3</sub> OH)  | 165 |
| 273 | cracoson D                     |    | <i>Croton crassifolius</i> (roots)          | $[\alpha]_D^{25} +72.0$ (c 1.0, CH <sub>3</sub> OH)   | 166 |
| 274 | haplomintrin A                 |  | <i>Haplomitrium mnioides</i> (whole plants) | $[\alpha]_D^{20} +36.4$ (c 1.0, CH <sub>3</sub> CN)   | 167 |
| 275 | haplomintrin B                 |  | <i>Haplomitrium mnioides</i> (whole plants) | $[\alpha]_D^{20} -39.2$ (c 1.0, CH <sub>3</sub> CN)   | 167 |

|     |                      |                                                                                     |                                    |                                                       |     |
|-----|----------------------|-------------------------------------------------------------------------------------|------------------------------------|-------------------------------------------------------|-----|
| 276 | aphapolin A          | 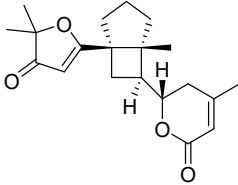  | <i>Aphanamixis polystachya</i>     | $[\alpha]^{20}_D +55.3$ (c 1.0, CHCl <sub>3</sub> )   | 168 |
| 277 | methyl sarcotroate A |    | <i>Sarcophyton trocheliophorum</i> | $[\alpha]^{24}_D +54.0$ (c 0.12, CHCl <sub>3</sub> )  | 169 |
| 278 | methyl sarcotroate B |    | <i>Sarcophyton trocheliophorum</i> | $[\alpha]^{24}_D +224.0$ (c 0.12, CHCl <sub>3</sub> ) | 169 |
| 279 | tortuosumol          |    | <i>Sarcophyton Tortuosum</i>       | $[\alpha]^{25}_D +124.0$ (c 0.9, CHCl <sub>3</sub> )  | 62  |
| 280 | humilisin E          |   | <i>Sinularia humilis</i>           | $[\alpha]^{20}_D +19.5$ (c 0.22, CHCl <sub>3</sub> )  | 170 |
| 281 | humilisin F          |  | <i>Sinularia humilis</i>           | $[\alpha]^{20}_D +26.3$ (c 0.28, CHCl <sub>3</sub> )  | 170 |

|     |                  |                                                                                      |                                                  |                                                      |     |
|-----|------------------|--------------------------------------------------------------------------------------|--------------------------------------------------|------------------------------------------------------|-----|
| 282 | sarcoglane       | 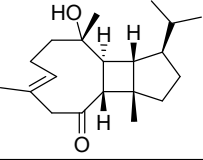   | <i>Sarcophyton glaucum</i>                       | $[\alpha]_D +110.0$                                  | 171 |
| 283 | locrassumin C    |    | <i>Lobophytum crassum</i>                        | $[\alpha]^{25}_D +44.0$ (c 0.1, CHCl <sub>3</sub> )  | 172 |
| 284 | bielschowskyisin |    | <i>Pseudopterogorgia kallos</i>                  | $[\alpha]^{20}_D -17.3$ (c 1.1, CH <sub>3</sub> OH)  | 173 |
| 285 | plumisclerin A   |    | <i>Plumigorgia terminosclera</i>                 | $[\alpha]^{25}_D +125.0$ (c 0.5, CHCl <sub>3</sub> ) | 174 |
| 286 | psathyrin A      |   | <i>Psathyrella candolleana</i> (fruiting bodies) | $[\alpha]^{26}_D -28.6$ (c 0.27, CH <sub>3</sub> OH) | 175 |
| 287 | psathyrin B      |  | <i>Psathyrella candolleana</i> (fruiting bodies) | $[\alpha]^{24}_D +87.5$ (c 0.8, CH <sub>3</sub> OH)  | 175 |



|     |              |                                                                                      |                                         |                                                                       |     |
|-----|--------------|--------------------------------------------------------------------------------------|-----------------------------------------|-----------------------------------------------------------------------|-----|
| 288 | vulgarisin A | 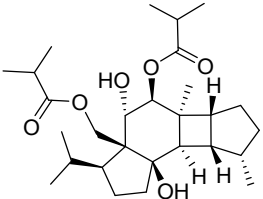   | <i>Prunella vulgaris</i> (whole plants) | $[\alpha]_{\text{D}}^{20} +2.59$ ( <i>c</i> 1.07, CHCl <sub>3</sub> ) | 176 |
| 289 | vulgarisin B |    | <i>Prunella vulgaris</i> (whole plants) | $[\alpha]_{\text{D}}^{30} +11.1$ ( <i>c</i> 0.7, CHCl <sub>3</sub> )  | 177 |
| 290 | vulgarisin C |    | <i>Prunella vulgaris</i> (whole plants) | $[\alpha]_{\text{D}}^{30} +8.9$ ( <i>c</i> 0.6, CHCl <sub>3</sub> )   | 177 |
| 291 | vulgarisin D |   | <i>Prunella vulgaris</i> (whole plants) | $[\alpha]_{\text{D}}^{30} +3.09$ ( <i>c</i> 0.9, CHCl <sub>3</sub> )  | 177 |
| 292 | vulgarisin E |  | <i>Prunella vulgaris</i>                | —                                                                     | 178 |

|     |                    |                                                                                      |                                                         |                                                                  |          |
|-----|--------------------|--------------------------------------------------------------------------------------|---------------------------------------------------------|------------------------------------------------------------------|----------|
| 293 | vulgarisin F       | 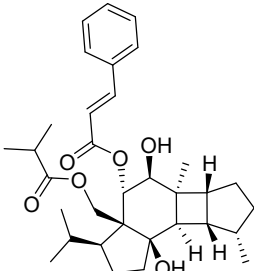   | <i>Prunella vulgaris</i>                                | —                                                                | 178      |
| 294 | cyclomegistine     |    | <i>Sarcomelicope megistophylla</i><br>(bark)            | $[\alpha]_{D}^{25} 0$ (c 0.07, CH <sub>2</sub> Cl <sub>2</sub> ) | 179      |
| 295 | phlegmadine A      |    | <i>Phlegmariurus phlegmaria</i><br>(whole plants)       | $[\alpha]_{D}^{18.9} +43.88$ (c 0.1, CH <sub>3</sub> OH)         | 180      |
| 296 | bicyclomahanimbine |   | <i>Murraya koenigii</i> (leaves)                        | $[\alpha]_{D}^{23} -1.23$ (CHCl <sub>3</sub> )                   | 181, 182 |
| 297 | murrayafoline M    |  | <i>Murraya euchrestifolia</i> (leaves<br>and root bark) | —                                                                | 183      |

|      |                                                                                                       |                                                                                     |                                        |                                                              |     |
|------|-------------------------------------------------------------------------------------------------------|-------------------------------------------------------------------------------------|----------------------------------------|--------------------------------------------------------------|-----|
| 298  | isofutoquinol A                                                                                       | 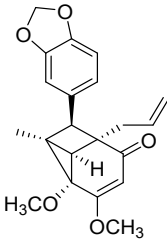   | <i>Piper futokadzura</i> (leaves)      | $[\alpha]_D 0$                                               | 184 |
| 299  | 6-allyl-7-(3,4-dimethoxyphenyl)-2,3-dimethoxy-8-methyltricyclo[4.2.0.0 <sup>2,8</sup> ]oct-3-en-5-one |    | <i>Magnolia denudate</i> (flower buds) | $[\alpha]_D +67.2$ ( <i>c</i> 1.68, CHCl <sub>3</sub> )      | 185 |
| 300a | (+)–piperhancin A                                                                                     |    | <i>Piper hancei</i> (stems)            | $[\alpha]^{20}_D +74.0$ ( <i>c</i> 0.1, CH <sub>3</sub> OH)  | 186 |
| 300b | (–)-piperhancin A                                                                                     |   | <i>Piper hancei</i> (stems)            | $[\alpha]^{20}_D -72.0$ ( <i>c</i> 0.1, CH <sub>3</sub> OH)  | 186 |
| 301a | (–)-piperhancin B                                                                                     |  | <i>Piper hancei</i> (stems)            | $[\alpha]^{20}_D -130.0$ ( <i>c</i> 0.1, CH <sub>3</sub> OH) | 186 |

|      |                            |                                                                                      |                                             |                                                               |     |
|------|----------------------------|--------------------------------------------------------------------------------------|---------------------------------------------|---------------------------------------------------------------|-----|
| 301b | (+) - piperhancin B        | 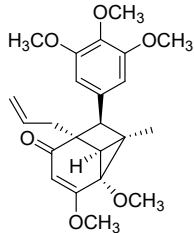    | <i>Piper hancei</i> (stems)                 | $[\alpha]_{\text{D}}^{20} +128.0$ (c 0.1, CH <sub>3</sub> OH) | 186 |
| 302  | eriobrucinol               |    | <i>Eriostemon brucei</i> (leaves and twigs) | $[\alpha]_{\text{D}} -195.0$ (c 0.1, CHCl <sub>3</sub> )      | 187 |
| 303  | hydroxyeriobrucinol        |    | <i>Eriostemon brucei</i> (leaves and twigs) | $[\alpha]_{\text{D}} -235.0$ (c 0.2, CH <sub>3</sub> OH)      | 187 |
| 304  | eriobrucinol regioisomer-A |    | <i>Eriostemon brucei</i> (aerial parts)     | $[\alpha]_{\text{D}} +47.0$ (c 0.1, CHCl <sub>3</sub> )       | 188 |
| 305  | eriobrucinol regioisomer-B |   | <i>Eriostemon brucei</i> (aerial parts)     | $[\alpha]_{\text{D}} -74.0$ (c 0.1, CHCl <sub>3</sub> )       | 188 |
| 306  | littoralisone              |  | <i>Verbena littoralis</i> (aerial parts)    | $[\alpha]_{\text{D}}^{26} -49.5$ (c 0.43, CH <sub>3</sub> OH) | 189 |

|      |                 |                                                                                     |                             |                                                                                        |                                                   |
|------|-----------------|-------------------------------------------------------------------------------------|-----------------------------|----------------------------------------------------------------------------------------|---------------------------------------------------|
| 307  | aquatolide      | 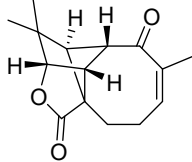   | <i>Asteriscus aquaticus</i> | [ $\alpha$ ] <sub>D</sub> +66.3 ( <i>c</i> 0.45, CHCl <sub>3</sub> )                   | original <sup>190</sup><br>revised <sup>191</sup> |
| 308  | hippolachnin A  |   | <i>Hippospongia lachne</i>  | [ $\alpha$ ] <sup>23</sup> <sub>D</sub> +27.0 ( <i>c</i> 0.12,<br>CH <sub>3</sub> OH)  | 192                                               |
| 309a | (-)-hippolide J |   | <i>Hippospongia lachne</i>  | [ $\alpha$ ] <sup>25</sup> <sub>D</sub> -128.0 ( <i>c</i> 0.05,<br>CH <sub>3</sub> OH) | 193                                               |
| 309b | (+)hippolide J  |  | <i>Hippospongia lachne</i>  | [ $\alpha$ ] <sup>25</sup> <sub>D</sub> +141.0 ( <i>c</i> 0.05,<br>CH <sub>3</sub> OH) | 193                                               |

## 2. Biological activities

**Table S2 Cytotoxicity of [2 + 2]-cycloaddition-derived cyclobutane natural products reported during the covered period.**

| NO. | Name                | Cell lines | Activity (IC <sub>50</sub> ) | Ref. |
|-----|---------------------|------------|------------------------------|------|
| 6   | piperarboresine     | P338       | 3.01 µg/mL                   | 5    |
|     |                     | HT29       | 3.52 µg/mL                   |      |
|     |                     | A549       | 3.10 µg/mL                   |      |
| 7   | piperarborenine A   | P338       | 0.12 µg/mL                   | 5    |
|     |                     | HT29       | 3.57 µg/mL                   |      |
|     |                     | A549       | 2.43 µg/mL                   |      |
| 8   | piperarborenine B   | P338       | 0.078 µg/mL                  | 5    |
|     |                     | HT29       | 1.46 µg/mL                   |      |
|     |                     | A549       | 0.84 µg/mL                   |      |
| 9   | piperarborenine C   | P338       | 0.11 µg/mL                   | 5    |
|     |                     | HT29       | 0.16 µg/mL                   |      |
|     |                     | A549       | 0.14 µg/mL                   |      |
| 10  | piperarborenine D   | P338       | 0.12 µg/mL                   | 5    |
|     |                     | HT29       | 0.21 µg/mL                   |      |
|     |                     | A549       | 0.17 µg/mL                   |      |
| 11  | piperarborenine E   | P338       | 0.01 µg/mL                   | 5    |
|     |                     | HT29       | 0.13 µg/mL                   |      |
|     |                     | A549       | 0.11 µg/mL                   |      |
| 20  | nigramide R         | L5178Y     | 9.3 µM                       | 16   |
| 25  | dipiperamide F      | L5178Y     | 10.0 µM                      | 16   |
| 26  | dipiperamide G      | L5178Y     | 13.9 µM                      | 16   |
| 48  | schischkiniin       | CaCo-2     | 76 µM                        | 25   |
| 51  | flueggidine         | MCF-7      | NI <sup>a</sup>              | 28   |
|     |                     | MDA-MB-231 | NI                           |      |
| 53  | orthoscuticelline A | HEK293     | 10.0 µM                      | 30   |

|            |                        |            |                                                           |    |
|------------|------------------------|------------|-----------------------------------------------------------|----|
| <b>54</b>  | orthoscuticelline B    | HEK293     | > 40.0 $\mu$ M                                            | 30 |
| <b>55a</b> | (+) -tengerensine      | MDA-MB-468 | 7.4 $\pm$ 2.1 $\mu$ M                                     | 31 |
|            |                        | MDA-MB-231 | > 10.0 $\mu$ M                                            |    |
|            |                        | MCF7       | > 10.0 $\mu$ M                                            |    |
|            |                        | MCF10A     | > 10.0 $\mu$ M                                            |    |
| <b>55b</b> | (-) -tengerensine      | MDA-MB-468 | > 10.0 $\mu$ M                                            | 31 |
|            |                        | MDA-MB-231 | > 10.0 $\mu$ M                                            |    |
|            |                        | MCF7       | > 10.0 $\mu$ M                                            |    |
|            |                        | MCF10A     | > 10.0 $\mu$ M                                            |    |
| <b>56</b>  | 15'-oxoadenosceptrin   | L929       | NI                                                        | 32 |
|            |                        | KB-31      | NI                                                        |    |
|            |                        | MCF-7      | NI                                                        |    |
|            |                        | FS4-LTM    | NI                                                        |    |
| <b>57</b>  | hexazosceptrin         | U937       | > 10 mg/mL                                                | 33 |
|            |                        | PC9        | > 10 mg/mL                                                |    |
| <b>58</b>  | ageleste A             | U937       | > 10 mg/mL                                                | 33 |
|            |                        | PC9        | > 10 mg/mL                                                |    |
| <b>59</b>  | ageleste B             | U937       | > 10 mg/mL                                                | 33 |
|            |                        | PC9        | > 10 mg/mL                                                |    |
| <b>65</b>  | oxyfadichalcone B      | PC3        | Inhibition(% of control) at 25 $\mu$ M<br>78.8 $\pm$ 0.7% | 38 |
| <b>66a</b> | (+) -oxyfadichalcone C | PC3        | 3.47 $\mu$ M                                              | 38 |
| <b>66b</b> | (-) -oxyfadichalcone C | PC3        | 3.84 $\mu$ M                                              | 38 |
| <b>67a</b> | (+) -oxyfadichalcone F | PC3        | Inhibition(% of control) at 25 $\mu$ M<br>75.5 $\pm$ 2.2% | 38 |
| <b>67b</b> | (-) -oxyfadichalcone F | PC3        | Inhibition(% of control) at 25 $\mu$ M<br>87.6 $\pm$ 1.2% | 38 |
| <b>68</b>  | paufferol A            | HL60       | 5.2 $\mu$ M                                               | 39 |

|           |                   |                                 |                                                                                  |    |
|-----------|-------------------|---------------------------------|----------------------------------------------------------------------------------|----|
| <b>69</b> | oxyfadichalcone A | PC3                             | Inhibition(% of control) at 25 $\mu$ M<br>88.0 $\pm$ 1.8%                        | 38 |
| <b>70</b> | oxyfadichalcone D | PC3                             | Inhibition(% of control) at 25 $\mu$ M<br>76.7 $\pm$ 1.3%                        | 38 |
| <b>71</b> | oxyfadichalcone E | PC3                             | Inhibition(% of control) at 25 $\mu$ M<br>57.9 $\pm$ 0.9%                        | 38 |
| <b>72</b> | tomoroside A      | NCI-H460<br>NCI-H460/R<br>HaCaT | 44.4 $\mu$ M<br>199 $\mu$ M<br>116 $\mu$ M                                       | 40 |
| <b>78</b> | xylopiana A       | MCF-7/DOX                       | 24.93 $\pm$ 9.62 $\mu$ M                                                         | 44 |
| <b>84</b> | chlorahupetone A  | A549<br>U87<br>SMMC-7721        | 12.91 $\pm$ 1.80 $\mu$ M<br>9.82 $\pm$ 1.21 $\mu$ M<br>26.31 $\pm$ 2.37 $\mu$ M  | 52 |
| <b>85</b> | chlorahupetone B  | A549<br>U87<br>SMMC-7721        | 18.69 $\pm$ 2.67 $\mu$ M<br>26.36 $\pm$ 3.39 $\mu$ M<br>>50 $\mu$ M              | 52 |
| <b>86</b> | chlorahupetone C  | A549<br>U87<br>SMMC-7721        | 38.76 $\pm$ 4.33 $\mu$ M<br>>50 $\mu$ M<br>>50 $\mu$ M                           | 52 |
| <b>87</b> | chlorahupetone D  | A549<br>U87<br>SMMC-7721        | 32.27 $\pm$ 2.40 $\mu$ M<br>>50 $\mu$ M<br>>50 $\mu$ M                           | 52 |
| <b>88</b> | chlorahupetone E  | A549<br>U87<br>SMMC-7721        | 15.18 $\pm$ 0.85 $\mu$ M<br>28.85 $\pm$ 3.18 $\mu$ M<br>42.21 $\pm$ 5.72 $\mu$ M | 52 |
| <b>89</b> | bimutipterosin A  | HL 60                           | 12.8 $\mu$ M                                                                     | 53 |
| <b>90</b> | bimutipterosin B  | HL 60                           | 26.6 $\mu$ M                                                                     | 53 |
| <b>95</b> | hispanonin A      | K562                            | > 100 $\mu$ M                                                                    | 57 |



|                        |                                 |                                                                                                   |           |                                                    |               |
|------------------------|---------------------------------|---------------------------------------------------------------------------------------------------|-----------|----------------------------------------------------|---------------|
|                        |                                 |                                                                                                   | HepG2     | > 100 $\mu$ M                                      |               |
| <b>96</b>              | bisjaponin B                    |                                                                                                   | K562      | > 100 $\mu$ M                                      | 57            |
|                        |                                 |                                                                                                   | HepG2     | > 100 $\mu$ M                                      |               |
| <b>98</b>              | bistenuifolin L                 |                                                                                                   | HL-60     | > 10 $\mu$ M                                       | 59            |
|                        |                                 |                                                                                                   | SMMC-7721 | > 10 $\mu$ M                                       |               |
|                        |                                 |                                                                                                   | A-549     | > 10 $\mu$ M                                       |               |
|                        |                                 |                                                                                                   | MCF-7     | > 10 $\mu$ M                                       |               |
|                        |                                 |                                                                                                   | SW-480    | > 10 $\mu$ M                                       |               |
| <b>99</b>              | bistenuifolin M                 |                                                                                                   | HL-60     | > 10 $\mu$ M                                       | 59            |
|                        |                                 |                                                                                                   | SMMC-7721 | > 10 $\mu$ M                                       |               |
|                        |                                 |                                                                                                   | A-549     | > 10 $\mu$ M                                       |               |
|                        |                                 |                                                                                                   | MCF-7     | > 10 $\mu$ M                                       |               |
|                        |                                 |                                                                                                   | SW-480    | > 10 $\mu$ M                                       |               |
| <b>100</b>             | crotoeurin A                    |                                                                                                   | A-549     | NI                                                 | 60            |
|                        |                                 |                                                                                                   | HL-60     | NI                                                 |               |
|                        |                                 |                                                                                                   | MCF-7     | NI                                                 |               |
|                        |                                 |                                                                                                   | SMMC-7721 | NI                                                 |               |
|                        |                                 |                                                                                                   | SW-480    | NI                                                 |               |
| <b>104</b>             | bisotortuolide cyclobutane A    |                                                                                                   | P388      | 8.5 $\mu$ M                                        | 62            |
|                        |                                 |                                                                                                   | K562      | 9.2 $\mu$ M                                        |               |
|                        |                                 |                                                                                                   | HT-29     | 34.1 $\mu$ M                                       |               |
| <b>105a</b>            | (+)-hyperterpenoid A            | against glutamic acid-induced toxicity in SK-N-SH cells<br>against (OGD)-induced in SK-N-SH cells |           | cell viability at 60.7%<br>cell viability at 50.6% | 63            |
| <b>105b</b>            | (-)-hyperterpenoid A            | against glutamic acid-induced toxicity in SK-N-SH cells<br>against (OGD)-induced in SK-N-SH cells |           | cell viability at 61.8%<br>cell viability at 53.5% | 63            |
| <b>106a</b>            | (+)-hyperterpenoid B            | against glutamic acid-induced toxicity in SK-N-SH cells<br>against (OGD)-induced in SK-N-SH cells |           | cell viability at 57.7%<br>cell viability at 47.7% | 63            |
| <del><b>106b</b></del> | <del>(-)-hyperterpenoid B</del> | <del>against glutamic acid-induced toxicity in SK-N-SH cells</del>                                |           | <del>cell viability at 57.8%</del>                 | <del>63</del> |

|            |                                                                                                                                              | against (OGD)-induced in SK-N-SH cells | cell viability at 69.4%                                |     |
|------------|----------------------------------------------------------------------------------------------------------------------------------------------|----------------------------------------|--------------------------------------------------------|-----|
| <b>107</b> | scopariusic acid                                                                                                                             | A-549                                  | 18.07 $\mu$ M                                          | 63  |
|            |                                                                                                                                              | HL-60                                  | 17.28 $\mu$ M                                          |     |
|            |                                                                                                                                              | MCF-7                                  | 16.55 $\mu$ M                                          |     |
|            |                                                                                                                                              | SMMC-7721                              | 22.54 $\mu$ M                                          |     |
|            |                                                                                                                                              | SW480                                  | 26.62 $\mu$ M                                          |     |
| <b>112</b> | biyouyanagin A                                                                                                                               | KB                                     | 38.8 $\pm$ 1.3 $\mu$ g/mL                              | 69  |
|            |                                                                                                                                              | KB-C2                                  | 36.2 $\pm$ 2.1 $\mu$ g/mL                              |     |
|            |                                                                                                                                              | KB-C2 (+Col.)                          | 16.8 $\pm$ 0.8 $\mu$ g/mL                              |     |
|            |                                                                                                                                              | MCF-7                                  | 27.1 $\pm$ 1.1 $\mu$ g/mL                              |     |
|            |                                                                                                                                              | K562                                   | 31.1 $\pm$ 0.4 $\mu$ g/mL                              |     |
|            |                                                                                                                                              | K562/Adr<br>COLO205                    | 16.6 $\pm$ 0.9 $\mu$ g/mL<br>26.9 $\pm$ 0.8 $\mu$ g/mL |     |
| <b>129</b> | methyl <i>rel</i> -(1 <i>R</i> ,2 <i>S</i> ,3 <i>S</i> )-2-(7-methoxy-1,3-benzodioxol-5-yl)-3-(2,4,5-trimethoxyphenyl)cyclobutanecarboxylate | HepG2                                  | 38.0 $\pm$ 2.2 $\mu$ M                                 | 86  |
|            |                                                                                                                                              | A549                                   | 56.4 $\pm$ 4.1 $\mu$ M                                 |     |
|            |                                                                                                                                              | HeLa                                   | 64.9 $\pm$ 3.4 $\mu$ M                                 |     |
| <b>130</b> | methyl <i>rel</i> -(1 <i>R</i> ,2 <i>R</i> ,3 <i>S</i> )-2-(7-methoxy-1,3-benzodioxol-5-yl)-3-(2,4,5-trimethoxyphenyl)cyclobutanecarboxylate | HepG2                                  | 42.4 $\pm$ 3.4 $\mu$ M                                 | 86  |
|            |                                                                                                                                              | A549                                   | 66.3 $\pm$ 6.4 $\mu$ M                                 |     |
|            |                                                                                                                                              | HeLa                                   | 77.7 $\pm$ 5.3 $\mu$ M                                 |     |
| <b>152</b> | geniculatin                                                                                                                                  | PC3                                    | NI                                                     | 107 |
| <b>175</b> | diyangonin A                                                                                                                                 | NCI-H46                                | NI                                                     | 113 |
|            |                                                                                                                                              | SW480                                  | NI                                                     |     |
|            |                                                                                                                                              | HepG2                                  | NI                                                     |     |
| <b>176</b> | diyangonin B                                                                                                                                 | NCI-H46                                | NI                                                     | 113 |
|            |                                                                                                                                              | SW480                                  | NI                                                     |     |
|            |                                                                                                                                              | HepG2                                  | NI                                                     |     |

|     |                                                                                                       |           |              |     |
|-----|-------------------------------------------------------------------------------------------------------|-----------|--------------|-----|
| 177 | diyangonin C                                                                                          | NCI-H46   | NI           | 113 |
|     |                                                                                                       | SW480     | NI           |     |
|     |                                                                                                       | HepG2     | NI           |     |
| 178 | <i>rel-,trans</i> -3-bis[6-(4-methoxy-2-pyronyl)]- <i>cis</i> -2, <i>trans</i> -4-diphenylcyclobutane | NCI-H46   | NI           | 113 |
|     |                                                                                                       | SW480     | NI           |     |
|     |                                                                                                       | HepG2     | NI           |     |
| 179 | 6,6'-(3,4-diphenylcyclobutane-1,2-diyl)bis(4-methoxy-2 <i>H</i> -pyran-2-one)                         | NCI-H46   | NI           | 113 |
|     |                                                                                                       | SW480     | NI           |     |
|     |                                                                                                       | HepG2     | NI           |     |
| 180 | velutinindimer A                                                                                      | KB        | NI           | 114 |
|     |                                                                                                       | MCF7      | NI           |     |
|     |                                                                                                       | NCI-H187  | NI           |     |
| 182 | katsumadain C                                                                                         | A375      | 37.4 $\mu$ M | 116 |
|     |                                                                                                       | MCF-7     | 8.7 $\mu$ M  |     |
|     |                                                                                                       | SMMC-7721 | 4.8 $\mu$ M  |     |
|     |                                                                                                       | HCT-116   | 18.1 $\mu$ M |     |
| 185 | yangonindimer A                                                                                       | NCI-H46   | NI           | 117 |
|     |                                                                                                       | SW480     | NI           |     |
|     |                                                                                                       | HepG2     | NI           |     |
| 186 | yangonindimer B                                                                                       | NCI-H46   | NI           | 117 |
|     |                                                                                                       | SW480     | NI           |     |
|     |                                                                                                       | HepG2     | NI           |     |
| 187 | yangonindimer C                                                                                       | NCI-H46   | NI           | 117 |
|     |                                                                                                       | SW480     | NI           |     |
|     |                                                                                                       | HepG2     | NI           |     |
| 188 | aniba dimer A                                                                                         | NCI-H46   | NI           | 117 |
|     |                                                                                                       | SW480     | NI           |     |
|     |                                                                                                       | HepG2     | NI           |     |

|            |                  |          |                              |          |
|------------|------------------|----------|------------------------------|----------|
| <b>189</b> | velutinindimer B | KB       | NI                           | 114      |
|            |                  | MCF7     | NI                           |          |
|            |                  | NCI-H187 | NI                           |          |
| <b>190</b> | velutinindimer C | KB       | NI                           | 114      |
|            |                  | MCF7     | NI                           |          |
|            |                  | NCI-H187 | NI                           |          |
| <b>194</b> | triligustilide A | SW480    | NI                           | 124      |
|            |                  | PANC-1   | NI                           |          |
|            |                  | MCF-7    | NI                           |          |
|            |                  | HepG2    | NI                           |          |
| <b>195</b> | triligustilide B | SW480    | NI                           | 124      |
|            |                  | PANC-1   | NI                           |          |
|            |                  | MCF-7    | NI                           |          |
|            |                  | HepG2    | NI                           |          |
| <b>200</b> | riligustilide    | SW480    | NI                           | 124, 133 |
|            |                  | PANC-1   | NI                           |          |
|            |                  | MCF-7    | NI                           |          |
|            |                  | A549     | $13.82 \pm 2.23 \mu\text{M}$ |          |
|            |                  | HTC-8    | $6.79 \pm 1.14 \mu\text{M}$  |          |
|            |                  | HepG2    | $7.92 \pm 1.38 \mu\text{M}$  |          |
| <b>201</b> | tokinolide A     | SW480    | NI                           | 124, 133 |
|            |                  | PANC-1   | NI                           |          |
|            |                  | MCF-7    | NI                           |          |
|            |                  | A549     | $47.63 \pm 4.51 \mu\text{M}$ |          |
|            |                  | HTC-8    | $55.84 \pm 5.99 \mu\text{M}$ |          |
|            |                  | HepG2    | $30.92 \pm 2.36 \mu\text{M}$ |          |
| <b>207</b> | neodiligustilide | L1210    | $5.45 \pm 0.19 \mu\text{M}$  | 130      |
|            |                  | K562     | $9.87 \pm 0.14 \mu\text{M}$  |          |

|             |                                                          |            |                 |     |
|-------------|----------------------------------------------------------|------------|-----------------|-----|
| <b>210</b>  | tokinolide C                                             | A549       | 34.34 ± 3.80 μM | 133 |
|             |                                                          | HTC-8      | 27.79 ± 3.42 μM |     |
|             |                                                          | HepG2      | 32.54 ± 2.69 μM |     |
| <b>211</b>  | <i>cis-Z,Z'</i> -3a.7a',7a.3a'-<br>dihydroxyiligustilide | A549       | > 80 μM         | 134 |
|             |                                                          | HTC-8      | > 80 μM         |     |
|             |                                                          | HepG2      | > 80 μM         |     |
| <b>215</b>  | (no trivial name given)                                  | KB         | NI              | 136 |
|             |                                                          | MCF-7      | NI              |     |
|             |                                                          | A549       | NI              |     |
| <b>220</b>  | cajanstilbenoid A                                        | HepG2      | 2.50 ± 0.2 μM   | 138 |
|             |                                                          | MCF-7      | 2.56 ± 0.3 μM   |     |
|             |                                                          | A549       | 2.14 ± 0.2 μM   |     |
| <b>221</b>  | cajanstilbenoid B                                        | HepG2      | 5.99 ± 0.3 μM   | 138 |
|             |                                                          | MCF-7      | 22.63 ± 0.4 μM  |     |
|             |                                                          | A549       | 6.18 ± 0.3 μM   |     |
| <b>222</b>  | (±)-cajanusine                                           | HepG2      | 16.23 ± 6.12 μM | 139 |
|             |                                                          | HepG2/ADM  | 20.45 ± 4.31 μM |     |
| <b>222a</b> | (+) -cajanusine                                          | HepG2      | 17.46 ± 5.03 μM | 139 |
|             |                                                          | HepG2/ADM  | 27.24 ± 7.88 μM |     |
| <b>222b</b> | (−)-cajanusine                                           | HepG2      | 18.03 ± 3.08 μM | 139 |
|             |                                                          | HepG2/ADM  | 13.29 ± 3.59 μM |     |
| <b>223</b>  | simmonoside A                                            | A-549      | 21.5 μM         | 140 |
|             |                                                          | SGC-7901   | 26.8 μM         |     |
| <b>224</b>  | simmonoside B                                            | A-549      | 17.7 μM         | 140 |
|             |                                                          | SGC-7901   | 20.4 μM         |     |
| <b>229</b>  | melicodenine G                                           | DLD-1      | 9.4 ± 0.3 μM    | 89  |
|             |                                                          | MDA-MB-231 | 1.9 μM          |     |
|             |                                                          | HeLa       | 2.5 μM          |     |

|             |                                                                |            |                        |     |
|-------------|----------------------------------------------------------------|------------|------------------------|-----|
|             |                                                                | MGC-803    | 1.3 $\mu$ M            |     |
|             |                                                                | MCF-7      | 2.1 $\mu$ M            |     |
|             |                                                                | A549       | 1.0 $\mu$ M            |     |
| <b>238</b>  | dipleosporalone B                                              | MDA-MB-231 | 3.8 $\mu$ M            |     |
|             |                                                                | HeLa       | 3.0 $\mu$ M            |     |
|             |                                                                | MGC-803    | 2.0 $\mu$ M            | 144 |
|             |                                                                | MCF-7      | > 10 $\mu$ M           |     |
|             |                                                                | A549       | 3.5 $\mu$ M            |     |
| <b>239</b>  | diasteltoxin A                                                 | HEK293T    | 132 $\mu$ M            |     |
|             |                                                                | H1299      | 188 $\mu$ M            | 145 |
|             |                                                                | MCF7       | 73 $\mu$ M             |     |
|             |                                                                | TrxR       | 12.8 $\pm$ 0.8 $\mu$ M |     |
| <b>240</b>  | diasteltoxin B                                                 | HEK293T    | 102 $\mu$ M            |     |
|             |                                                                | H1299      | 164 $\mu$ M            | 145 |
|             |                                                                | MCF7       | 127 $\mu$ M            |     |
|             |                                                                | TrxR       | 11.1 $\pm$ 0.2 $\mu$ M |     |
| <b>241</b>  | diasteltoxin C                                                 | HEK293T    | 79 $\mu$ M             |     |
|             |                                                                | H1299      | 142 $\mu$ M            | 145 |
|             |                                                                | MCF7       | 50 $\mu$ M             |     |
|             |                                                                | TrxR       | 7.2 $\pm$ 0.2 $\mu$ M  |     |
| <b>242a</b> | (+) - phomone A                                                | HL-60      | > 50 $\mu$ M           |     |
|             |                                                                | PC-3       | > 50 $\mu$ M           | 146 |
|             |                                                                | HCT-116,   | > 50 $\mu$ M           |     |
| <b>242b</b> | (-) - phomone A                                                | HL-60      | > 50 $\mu$ M           |     |
|             |                                                                | PC-3       | > 50 $\mu$ M           | 146 |
|             |                                                                | HCT-116,   | > 50 $\mu$ M           |     |
| <b>243a</b> | 5 <i>S</i> , 6 <i>S</i> , 7' <i>R</i> , 8' <i>R</i> -phomone B | HL-60      | > 50 $\mu$ M           |     |
|             |                                                                | PC-3       | > 50 $\mu$ M           | 146 |

|             |                                    |            |               |     |
|-------------|------------------------------------|------------|---------------|-----|
|             |                                    | HCT-116,   | > 50 $\mu$ M  |     |
| <b>243b</b> | <i>5R, 6R, 7'S, 8'S</i> -phomone B | HL-60      | > 50 $\mu$ M  | 146 |
|             |                                    | PC-3       | > 50 $\mu$ M  |     |
|             |                                    | HCT-116,   | > 50 $\mu$ M  |     |
|             |                                    | A549       | >100 $\mu$ M  |     |
| <b>248</b>  | rubiginosin B                      | HCT116     | 65.72 $\mu$ M | 151 |
|             |                                    | SK-HEP-1   | 84.66 $\mu$ M |     |
|             |                                    | HL-60      | >100 $\mu$ M  |     |
|             |                                    | A549       | 49.18 $\mu$ M |     |
| <b>249</b>  | rubiginosin C                      | HCT116     | 32.17 $\mu$ M | 151 |
|             |                                    | SK-HEP-1   | 13.66 $\mu$ M |     |
|             |                                    | HL-60      | 40.07 $\mu$ M |     |
|             |                                    | A549       | 40.45 $\mu$ M |     |
| <b>250</b>  | rubiginosin G                      | HCT116     | 17.43 $\mu$ M | 151 |
|             |                                    | SK-HEP-1   | 26.26 $\mu$ M |     |
|             |                                    | HL-60      | 16.44 $\mu$ M |     |
|             |                                    | A549       | 16.15 $\mu$ M |     |
| <b>259</b>  | $(\pm)$ -rubiginosin A             | HCT116     | 15.56 $\mu$ M | 151 |
|             |                                    | SK-HEP-1   | 13.80 $\mu$ M |     |
|             |                                    | HL-60      | 12.84 $\mu$ M |     |
|             |                                    | MDA-MB-231 | 24.7 $\mu$ M  |     |
| <b>269</b>  | heliosterpenoid A                  | A549       | NI            | 164 |
|             |                                    | Hela       | NI            |     |
|             |                                    | U118MFG    | NI            |     |
|             |                                    | RKO        | NI            |     |
| <b>270</b>  | heliosterpenoid B                  | MDA-MB-231 | NI            | 164 |
|             |                                    | A549       | NI            |     |
|             |                                    | Hela       | NI            |     |

|            |                 |            |                               |     |
|------------|-----------------|------------|-------------------------------|-----|
|            |                 | U118MFG    | NI                            |     |
|            |                 | RKO        | NI                            |     |
| <b>273</b> | cracroson D     | T24        | 14.48 ± 0.65 µM               | 166 |
|            |                 | A549       | 25.64 ± 2.14 µM               |     |
| <b>279</b> | tortuosumol     | MOLT 4     | 21.7 µM                       | 62  |
| <b>284</b> | bielschowskysin | EKVX       | < 0.01 µM (GI <sub>50</sub> ) | 173 |
|            |                 | CAKI-1     | 0.51 µM (GI <sub>50</sub> )   |     |
| <b>285</b> | plumisclerin A  | A549       | 4.7 µM (GI <sub>50</sub> )    | 174 |
|            |                 | HT29       | 2.1 µM (GI <sub>50</sub> )    |     |
|            |                 | MDA-MB-231 | 6.1 µM (GI <sub>50</sub> )    |     |
| <b>288</b> | vulgarisin A    | A549       | 57.0 µM                       | 176 |
| <b>289</b> | vulgarisin B    | A549       | 18.0 µM                       | 177 |
|            |                 | K562       | NI                            |     |
|            |                 | HeLa 60    | NI                            |     |
| <b>290</b> | vulgarisin C    | A549       | 25.7 µM                       | 177 |
|            |                 | K562       | NI                            |     |
|            |                 | HeLa 60    | NI                            |     |
| <b>291</b> | vulgarisin D    | A549       | NI                            | 177 |
|            |                 | K562       | NI                            |     |
|            |                 | HeLa 60    | NI                            |     |
| <b>308</b> | hippolachnin A  | HCT-116    | NI                            | 192 |
|            |                 | A549       | NI                            |     |
|            |                 | HeLa       | NI                            |     |

<sup>a</sup> NI = no inhibition



**Table S3 Anti-inflammatory activity of [2 + 2]-cycloaddition-derived cyclobutane natural products reported during the covered period.**

| NO.  | Name                         | Cell lines                                                                                                                        | Activity (IC <sub>50</sub> )<br>Inhibition of NO production | Ref. |
|------|------------------------------|-----------------------------------------------------------------------------------------------------------------------------------|-------------------------------------------------------------|------|
| 22   | pipernigramide E             | LPS-induced RAW 264.7 cells                                                                                                       | 4.74 ± 0.18 μM                                              | 14   |
| 23   | pipernigramide F             | LPS-induced RAW 264.7 cells                                                                                                       | 4.08 ± 0.19 μM                                              | 14   |
| 27   | abrusamide A                 | LPS-induced RAW 264.7 cells                                                                                                       | 23.4 ± 2.31 μM                                              | 18   |
| 30   | abrusamide D                 | LPS-induced RAW 264.7 cells                                                                                                       | 25.2 ± 2.15 μM                                              | 18   |
| 34   | abrusamide H                 | LPS-induced RAW 264.7 cells                                                                                                       | 28.3 ± 2.89 μM                                              | 18   |
| 49   | orthidine E                  | PMA-stimulated human neutrophils                                                                                                  | Superoxide Inhibition 10.67 ± 1.57 μM                       | 26   |
| 52   | quassidine A                 | Inhibition of NO production<br>Inhibition of TNF-α                                                                                | 88.39 μM<br>88.41 μM                                        | 29   |
| 77   | xylopidimer D                | LPS-induced RAW 264.7 cells                                                                                                       | 4.59 ± 1.04 μM<br>(no cytotoxicity against RAW264.7 cells)  | 43   |
| 80   | artecin A                    | LPS-stimulated BV-2 cells                                                                                                         | 38.78 μM                                                    | 46   |
| 83   | chololactone H               | LPS-induced RAW 264.7 cells                                                                                                       | 4.4 ± 1.8 μM                                                | 51   |
| 91   | artepestrin A                | LPS-stimulated BV-2 cells                                                                                                         | 27.3 ± 0.7 μM                                               | 54   |
| 92   | artepestrin B                | LPS-stimulated BV-2 cells                                                                                                         | 39.8 ± 2.7 μM                                               | 54   |
| 93   | artepestrin C                | LPS-stimulated BV-2 cells                                                                                                         | 29.8 ± 1.4 μM                                               | 54   |
| 104  | bisotortuolide cyclobutane A | LPS-induced RAW 264.7 cells<br>(fMLF/CB)-induced superoxide radical anion generation<br>and elastase release in human neutrophils | 36.7 μM<br>5.94 ± 1.36 and 6.17 ± 0.48 μM,<br>respectively  | 62   |
| 105a | (+)-hyperterpenoid A         | LPS-stimulated BV-2 cells                                                                                                         | 22.53% (IR <sup>b</sup> )                                   | 63   |
| 105b | (-)-hyperterpenoid A         | LPS-stimulated BV-2 cells                                                                                                         | 23.68% (IR)                                                 | 63   |
| 106a | (+)-hyperterpenoid B         | LPS-stimulated BV-2 cells                                                                                                         | 3.14 μmol/L<br>0.69% (IR)                                   | 63   |
| 106b | (-)-hyperterpenoid B         | LPS-stimulated BV-2 cells                                                                                                         | 80.12% (IR)                                                 | 63   |

|             |                                                                                                        |                                                  |                                  |     |
|-------------|--------------------------------------------------------------------------------------------------------|--------------------------------------------------|----------------------------------|-----|
| <b>119</b>  | magnosalin                                                                                             | LPS-induced RAW 264.7 cells                      | 5.9 $\mu$ M                      | 194 |
| <b>120</b>  | andamanicin                                                                                            | LPS-induced RAW 264.7 cells                      | 53.5 $\mu$ M                     | 194 |
| <b>146</b>  | diinnovanoside B                                                                                       | LPS-induced RAW 264.7 cells                      | 0.284 $\mu$ M                    | 101 |
| <b>157</b>  | biginkgoside E                                                                                         | LPS-stimulated BV-2 cells                        | 2.91 $\mu$ M                     | 108 |
| <b>160</b>  | biginkgoside H                                                                                         | LPS-stimulated BV-2 cells                        | 17.23 $\mu$ M                    | 108 |
| <b>171</b>  | itoside N                                                                                              | —                                                | COX-2 Inhibition 67.3 $\pm$ 0.6% | 111 |
| <b>178</b>  | <i>rel-,trans</i> -3-bis[6-(4-methoxy-2-pyronyl)]- <i>cis</i> -2, <i>trans</i> -4-diphenyl cyclobutane | IL-1 $\beta$ -treated hepatocytes                | 33.8 $\pm$ 13.3 $\mu$ M          | 113 |
| <b>179</b>  | 6,6'-(3,4-diphenylcyclobutane-1,2-diyl)bis(4-methoxy-2 <i>H</i> -pyran-2-one)                          | IL-1 $\beta$ -treated hepatocytes                | 25.5 $\pm$ 10.6 $\mu$ M          | 113 |
| <b>188</b>  | aniba dimer A                                                                                          | IL-1 $\beta$ -treated hepatocytes                | 34.2 $\pm$ 14.7 $\mu$ M          | 122 |
| <b>192</b>  | aniba dimer C                                                                                          | IL-1 $\beta$ -treated hepatocytes                | 25.3 $\pm$ 16.1 $\mu$ M          | 122 |
| <b>216</b>  | multiflorumiside A                                                                                     | LPS-induced RAW 264.7 cells                      | 22.4 $\pm$ 3.8%                  | 137 |
| <b>217</b>  | multiflorumiside B                                                                                     | LPS-induced RAW 264.7 cells                      | 16.7 $\pm$ 4.4%                  | 137 |
| <b>218</b>  | multiflorumiside C                                                                                     | LPS-induced RAW 264.7 cells                      | 22.0 $\pm$ 6.0%                  | 137 |
| <b>219</b>  | multiflorumiside D                                                                                     | LPS-induced RAW 264.7 cells                      | 16.8 $\pm$ 5.0%                  | 137 |
| <b>280</b>  | humilisin E                                                                                            | LPS-stimulated BV-2 cells                        | NI <sup>a</sup>                  | 170 |
| <b>281</b>  | humilisin F                                                                                            | LPS-stimulated BV-2 cells                        | 83.96 $\pm$ 2.02%                | 170 |
| <b>283</b>  | locrassumin C                                                                                          | LPS-induced mouse peritoneal macrophages         | > 30 $\mu$ M                     | 172 |
| <b>300a</b> | (+)-piperhancin A                                                                                      | LPS-stimulated BV-2 cells                        | 26.1 $\pm$ 1.8 $\mu$ M           | 186 |
| <b>300b</b> | (-)-piperhancin A                                                                                      | LPS-stimulated BV-2 cells                        | 10.4 $\pm$ 1.1 $\mu$ M           | 186 |
| <b>301a</b> | (-)-piperhancin B                                                                                      | LPS-stimulated BV-2 cells                        | 1.1 $\pm$ 0.2 $\mu$ M            | 186 |
| <b>301b</b> | (+)-piperhancin B                                                                                      | LPS-stimulated BV-2 cells                        | 8.2 $\pm$ 1.6 $\mu$ M            | 186 |
| <b>260a</b> | (-)-anthoponoid B                                                                                      | NF- $\kappa$ B pathway luciferase reporter assay | NI                               | 157 |
| <b>260b</b> | (+)-anthoponoid B                                                                                      | NF- $\kappa$ B pathway luciferase reporter assay | NI                               | 157 |
| <b>261a</b> | (-)-anthoponoid C                                                                                      | NF- $\kappa$ B pathway luciferase reporter assay | NI                               | 157 |
| <b>261b</b> | (+)-anthoponoid C                                                                                      | NF- $\kappa$ B pathway luciferase reporter assay | NI                               | 157 |

|             |                   |                                                  |    |     |
|-------------|-------------------|--------------------------------------------------|----|-----|
| <b>262a</b> | (+)-anthoponoid D | NF- $\kappa$ B pathway luciferase reporter assay | NI | 157 |
| <b>262b</b> | (-)-anthoponoid D | NF- $\kappa$ B pathway luciferase reporter assay | NI | 157 |

<sup>a</sup> NI: no inhibition, <sup>b</sup>IR: inhibitory ratio

**Table S4 Neuroprotective activity of [2 + 2]-cycloaddition-derived cyclobutane natural products reported during the covered period.**

| <b>NO.</b>  | <b>Name</b>               | <b>Cell lines</b>                                                                                            | <b>Activity (Survival rate)</b> | <b>Ref.</b> |
|-------------|---------------------------|--------------------------------------------------------------------------------------------------------------|---------------------------------|-------------|
| <b>27</b>   | abrusamide A              | CCl <sub>4</sub> -induced human L-02 cells                                                                   | 51%                             | 17          |
| <b>28</b>   | abrusamide B              | CCl <sub>4</sub> -induced human L-02 cells                                                                   | 48%                             | 17          |
| <b>105a</b> | (+)-hyperterpenoid A      | glutamic acid-induced toxicity in SK-N-SH cells<br>oxygen glucose deprivation (OGD)-induced in SK-N-SH cells | 60.7%<br>50.6%                  | 63          |
| <b>105b</b> | (-)-hyperterpenoid A      | glutamic acid-induced toxicity in SK-N-SH cells<br>oxygen glucose deprivation (OGD)-induced in SK-N-SH cells | 61.8%<br>53.5%                  | 63          |
| <b>106a</b> | (+)-hyperterpenoid B      | glutamic acid-induced toxicity in SK-N-SH cells<br>oxygen glucose deprivation (OGD)-induced in SK-N-SH cells | 57.7%<br>47.7%                  | 63          |
| <b>106b</b> | (-)-hyperterpenoid B      | glutamic acid-induced toxicity in SK-N-SH cells<br>oxygen glucose deprivation (OGD)-induced in SK-N-SH cells | 57.8%<br>69.4%                  | 63          |
| <b>128a</b> | (+)-isatisycloneolignan A | MPP <sup>+</sup> -induced SH-SY5Y cell                                                                       | 77.64%                          | 85          |
| <b>128b</b> | (-)-isatisycloneolignan A | MPP <sup>+</sup> -induced SH-SY5Y cell                                                                       | 78.62%                          | 85          |
| <b>158</b>  | biginkgoside F            | A $\beta$ <sub>25-35</sub> -induced cell viability decrease in SH-SY5Y cells                                 | increase by 34.3%               | 108         |
| <b>201</b>  | tokinolide A              | glutamate-induced SH-SY5Y cells                                                                              | 69.0 ± 7.6%                     | 133         |
| <b>210</b>  | tokinolide C              | glutamate-induced SH-SY5Y cells                                                                              | 62.5 ± 2.0%                     | 133         |

**Table S5 Antifungal and antibacterial activity of [2 + 2]-cycloaddition-derived cyclobutane natural products reported during the covered period.**

| NO. | Name                 | Strain                                                       | Activity (% inhibition/MIC) | Ref. |
|-----|----------------------|--------------------------------------------------------------|-----------------------------|------|
| 46  | biswasalexin A1      | <i>Alternaria brassicicola</i>                               | 29 ± 1%                     | 24   |
|     |                      | <i>Leptosphaeria maculans</i> BJ-125                         | 40 ± 2%                     |      |
|     |                      | <i>Leptosphaeria maculans</i> Laird 2                        | 47 ± 8%                     |      |
|     |                      | <i>Rhizoctonia solani</i>                                    | NI <sup>a</sup>             |      |
|     |                      | <i>Sclerotinia sclerotiorum</i>                              | 42 ± 10%                    |      |
| 47  | biswasalexin A2      | <i>Alternaria brassicicola</i>                               | 44 ± 3%                     | 24   |
|     |                      | <i>Leptosphaeria maculans</i> BJ-125                         | 65 ± 3%                     |      |
|     |                      | <i>Leptosphaeria maculans</i> Laird 2                        | 49 ± 4%                     |      |
|     |                      | <i>Rhizoctonia solani</i>                                    | 22 ± 5%                     |      |
|     |                      | <i>Sclerotinia sclerotiorum</i>                              | 63 ± 3%                     |      |
| 56  | 15'-oxoadenosceptrin | <i>Staphylococcus aureus</i> (MRSA)                          | NI                          | 32   |
|     |                      | <i>S. aureus</i> (MSSA)                                      | NI                          |      |
|     |                      | <i>Micrococcus luteus</i>                                    | NI                          |      |
|     |                      | <i>Pseudomonas aeruginosa</i>                                | NI                          |      |
|     |                      | <i>Klebsiella pneumoniae</i>                                 | NI                          |      |
| 57  | hexazosceptrin       | methicillin-sensitive <i>Staphylococcus aureus</i> ATCC25923 | 16 µg/mL                    | 33   |
|     |                      | methicillin-resistant <i>S. aureus</i> ATCC43300             | 16 µg/mL                    |      |
| 58  | ageleste A           | <i>Escherichia coli</i> ATCC25922                            | >32 µg/mL                   | 33   |
|     |                      | methicillin-sensitive <i>Staphylococcus aureus</i> ATCC25923 | >32 µg/mL                   |      |
| 59  | ageleste B           | methicillin-resistant <i>S. aureus</i> ATCC43300             | >32 µg/mL                   | 33   |
|     |                      | <i>Escherichia coli</i> ATCC25922                            | >32 µg/mL                   |      |
| 59  | ageleste B           | methicillin-sensitive <i>Staphylococcus aureus</i> ATCC25923 | >32 µg/mL                   | 33   |
|     |                      | methicillin-resistant <i>S. aureus</i> ATCC43300             | >32 µg/mL                   |      |
| 141 | campebina A          | <i>Cryptococcus neoformans</i>                               | 33.3 µg/mL                  | 37   |

|            |                     | <i>Trichophyton mentagrophytes</i> | 33.3 µg/mL |     |
|------------|---------------------|------------------------------------|------------|-----|
| <b>180</b> | velutinindimer A    | <i>Mycobacterium tuberculosis</i>  | NI         | 114 |
| <b>189</b> | velutinindimer B    | <i>Mycobacterium tuberculosis</i>  | NI         | 114 |
| <b>190</b> | velutinindimer C    | <i>Mycobacterium tuberculosis</i>  | NI         | 114 |
| <b>194</b> | triligustilide A    | <i>Staphylococcus aureus</i> 209P  | NI         | 124 |
|            |                     | <i>Escherichia coli</i> ATCC0111   | NI         |     |
|            |                     | <i>Canidia albicans</i> FIM709     | NI         |     |
|            |                     | <i>Aspergillus niger</i> R330      | NI         |     |
| <b>195</b> | triligustilide B    | <i>Staphylococcus aureus</i> 209P  | NI         | 124 |
|            |                     | <i>Escherichia coli</i> ATCC0111   | NI         |     |
|            |                     | <i>Canidia albicans</i> FIM709     | NI         |     |
|            |                     | <i>Aspergillus niger</i> R330      | NI         |     |
| <b>196</b> | triangelipthalide A | <i>Staphylococcus aureus</i> 209P  | NI         | 125 |
|            |                     | <i>Escherichia coli</i> ATCC0111   | NI         |     |
|            |                     | <i>Canidia albicans</i> FIM709     | NI         |     |
|            |                     | <i>Aspergillus niger</i> R330      | NI         |     |
| <b>197</b> | triangelipthalide B | <i>Staphylococcus aureus</i> 209P  | NI         | 125 |
|            |                     | <i>Escherichia coli</i> ATCC0111   | NI         |     |
|            |                     | <i>Canidia albicans</i> FIM709     | NI         |     |
|            |                     | <i>Aspergillus niger</i> R330      | NI         |     |
| <b>198</b> | triangelipthalide C | <i>Staphylococcus aureus</i> 209P  | NI         | 125 |
|            |                     | <i>Escherichia coli</i> ATCC0111   | NI         |     |
|            |                     | <i>Canidia albicans</i> FIM709     | NI         |     |
|            |                     | <i>Aspergillus niger</i> R330      | NI         |     |
| <b>199</b> | triangelipthalide D | <i>Staphylococcus aureus</i> 209P  | NI         | 125 |
|            |                     | <i>Escherichia coli</i> ATCC0111   | NI         |     |
|            |                     | <i>Canidia albicans</i> FIM709     | NI         |     |
|            |                     | <i>Aspergillus niger</i> R330      | NI         |     |

|            |                    |                                              |                   |     |
|------------|--------------------|----------------------------------------------|-------------------|-----|
| <b>200</b> | riligustilide      | <i>Staphylococcus aureus</i> 209P            | NI                | 124 |
|            |                    | <i>Escherichia coli</i> ATCC0111             | NI                |     |
|            |                    | <i>Canidia albicans</i> FIM709               | NI                |     |
|            |                    | <i>Aspergillus niger</i> R330                | NI                |     |
| <b>201</b> | tokinolide A       | <i>Staphylococcus aureus</i> 209P            | NI                | 124 |
|            |                    | <i>Escherichia coli</i> ATCC0111             | NI                |     |
|            |                    | <i>Canidia albicans</i> FIM709               | NI                |     |
|            |                    | <i>Aspergillus niger</i> R330                | NI                |     |
| <b>202</b> | diangelipthalide A | <i>Staphylococcus aureus</i> 209P            | NI                | 125 |
|            |                    | <i>Escherichia coli</i> ATCC0111             | NI                |     |
|            |                    | <i>Canidia albicans</i> FIM709               | NI                |     |
|            |                    | <i>Aspergillus niger</i> R330                | NI                |     |
| <b>276</b> | aphapolin A        | <i>Aeromonas hydrophila</i> ATCC 7966        | >50 µg/mL         | 168 |
|            |                    | <i>Klebsiella pneumoniae</i> suspension      | >50 µg/mL         |     |
|            |                    | <i>Pneumoniae</i> ATCC 13883                 | >50 µg/mL         |     |
|            |                    | <i>Acinetobacter baumannii</i> ATCC 19606TMA | >50 µg/mL         |     |
|            |                    | <i>Escherichia Coli</i> ATCC 2599<br>MRSA    | >50 µg/mL         |     |
| <b>286</b> | psathyrin A        | <i>Staphylococcus aureus</i>                 | 14.3 ± 0.3 µg/mL  | 175 |
|            |                    | <i>Salmonella enterica</i>                   | 77.9 ± 0.2 µg/mL  |     |
|            |                    | <i>Pseudomonas aeruginosa</i>                | >128 µg/mL        |     |
| <b>287</b> | psathyrin B        | <i>Staphylococcus aureus</i>                 | 22.7 ± 0.2 µg/mL  | 175 |
|            |                    | <i>Salmonella enterica</i>                   | 101.6 ± 0.1 µg/mL |     |
|            |                    | <i>Pseudomonas aeruginosa</i>                | >128 µg/mL        |     |
| <b>308</b> | hippolachnin A     | <i>Cryptococcus neoformans</i>               | 0.41 µM           | 192 |
|            |                    | <i>Candida albicans</i>                      | 13.1 µM           |     |
|            |                    | <i>Candida glabrata</i>                      | 1.63 µM           |     |
|            |                    | <i>Cryptococcus parapsilosis</i>             | 1.63 µM           |     |

|                                        |                 |                                        |                  |     |
|----------------------------------------|-----------------|----------------------------------------|------------------|-----|
|                                        |                 | <i>Aspergillus fumigatus</i>           | 13.1 µM          |     |
|                                        |                 | <i>Trichophyton rubrum</i>             | 0.41 µM          |     |
|                                        |                 | <i>Microsporum gypseum</i>             | 0.41 µM          |     |
| <b>309a</b>                            | (-)-hippolide J | <i>Candida albicans</i> Y0109          | 4.0 µg/mL        | 193 |
|                                        |                 | <i>Candida albicans</i> SC5314         | 0.125 µg/mL      |     |
|                                        |                 | <i>Candida parapsilosis</i> ATCC 22019 | 0.5 µg/mL        |     |
|                                        |                 | <i>Cryptococcus neoformans</i> 3260    | 0.5 µg/mL        |     |
|                                        |                 | <i>Candida glabrata</i> 537            | 0.125 µg/mL      |     |
|                                        |                 | <i>Aspergillus fumigatus</i> 07544     | 4.0 µg/mL        |     |
|                                        |                 | <i>Trichophyton rubrum</i> Cmccftla    | 0.125 µg/mL      |     |
|                                        |                 | <i>Microsporum gypseum</i> Cmccfmza    | 4.0 µg/mL        |     |
|                                        |                 | <b>309b</b>                            | (+) -hippolide J |     |
| <i>Candida albicans</i> SC5314         | 0.125 µg/mL     |                                        |                  |     |
| <i>Candida parapsilosis</i> ATCC 22019 | 0.5 µg/mL       |                                        |                  |     |
| <i>Cryptococcus neoformans</i> 3260    | 0.25 µg/mL      |                                        |                  |     |
| <i>Candida glabrata</i> 537            | 0.25 µg/mL      |                                        |                  |     |
| <i>Aspergillus fumigatus</i> 07544     | 2.0 µg/mL       |                                        |                  |     |
| <i>Trichophyton rubrum</i> Cmccftla    | 0.125 µg/mL     |                                        |                  |     |
| <i>Microsporum gypseum</i> Cmccfmza    | 2.0 µg/mL       |                                        |                  |     |

<sup>a</sup> NI = no inhibition



**Table S6** Antiplatelet aggregation activity of [2 + 2]-cycloaddition-derived cyclobutane natural products reported during the covered period.

| <b>NO.</b> | <b>Name</b>         | <b>Activity</b> | <b>Ref.</b> |
|------------|---------------------|-----------------|-------------|
| 194        | triligustilide A    | 31.4 ± 5.0%     | 124         |
| 195        | triligustilide B    | 27.1 ± 5.2%     | 124         |
| 196        | triangelipthalide A | 36.4 ± 4.2%     | 125         |
| 197        | triangelipthalide B | 30.6 ± 5.6%     | 125         |
| 198        | triangelipthalide C | 25.6 ± 5.6%     | 125         |
| 199        | triangelipthalide D | 24.6 ± 4.1%     | 125         |
| 200        | riligustilide       | 45.1 ± 4.6%     | 124         |
| 201        | tokinolide A        | 41.7 ± 5.9%     | 124         |
| 202        | diangelipthalide A  | 31.0 ± 2.6%     | 125         |
| 297        | murrayafoline M     | 82.4 ± 13.8%    | 183         |

**Table S7 Inhibitory effects on PTP1B of [2 + 2]-cycloaddition-derived cyclobutane natural products reported during the covered period.**

| <b>NO.</b>  | <b>Name</b>          | <b>Activity</b>   | <b>Ref.</b> |
|-------------|----------------------|-------------------|-------------|
| <b>251a</b> | (-)-rhodonoid A      | NI <sup>a</sup>   | 153         |
| <b>251b</b> | (+)-rhodonoid A      | NI                | 153         |
| <b>252a</b> | (-)-rhodonoid B      | 43.56 ± 8.53 μM   | 153         |
| <b>252b</b> | (+)-rhodonoid B      | 30.38 ± 13.41 μM  | 153         |
| <b>253a</b> | (+)-rhodonoid E      | NI                | 154         |
| <b>253b</b> | (-)-rhodonoid E      | NI                | 154         |
| <b>254a</b> | (+)-rhodonoid F      | NI                | 154         |
| <b>254b</b> | (-)-rhodonoid F      | NI                | 154         |
| <b>255a</b> | (-)-nyingchinoid D   | 58.2 ± 4.9 μM     | 155         |
| <b>255b</b> | (+)-nyingchinoid D   | NI                | 155         |
| <b>256a</b> | (+)-fastinoid A      | NI                | 156         |
| <b>256b</b> | (-)-fastinoid A      | NI                | 156         |
| <b>257a</b> | (+)-fastinoid B      | 47.0 ± 1.7 μmol/L | 156         |
| <b>257b</b> | (-)-fastinoid B      | 54.9 ± 9.7 μmol/L | 156         |
| <b>258a</b> | (+)-fastinoid C      | NI                | 156         |
| <b>258b</b> | (-)-fastinoid C      | NI                | 156         |
| <b>259a</b> | (+)-rubiginosin A    | 40.9 ± 2.6 μmol/L | 156         |
| <b>259b</b> | (-)-rubiginosin A    | 49.2 ± 1.4 μmol/L | 156         |
| <b>277</b>  | methyl sarcotroate A | NI                | 169         |
| <b>278</b>  | methyl sarcotroate B | 6.97 μM           | 169         |

<sup>a</sup>NI = no inhibition

**Table S8 Other activities of [2 + 2]-cycloaddition-derived cyclobutane natural products reported during the covered period.**

| NO. | Name                                                      | Bioassay                                                                                   | Activity                                                                  | Ref. |
|-----|-----------------------------------------------------------|--------------------------------------------------------------------------------------------|---------------------------------------------------------------------------|------|
| 13  | pipericyclobutanamide C                                   | against cytochrome P450 2D6 (CYP2D6)                                                       | > 100 $\mu$ M                                                             | 8, 9 |
| 14  | dipiperamide A                                            | against cytochrome P450 (CYP3A4)                                                           | 0.18 $\mu$ M                                                              | 10   |
| 15  | dipiperamide C                                            | against cytochrome P450 (CYP3A4)                                                           | 0.48 $\mu$ M                                                              | 10   |
| 16  | dipiperamide D                                            | against cytochrome P450 (CYP3A4)                                                           | 0.79 $\mu$ M                                                              | 12   |
| 17  | dipiperamide E                                            | against cytochrome P450 (CYP3A4)                                                           | 0.63 $\mu$ M                                                              | 12   |
| 20  | nigramide R                                               | against cytochrome P450 2D6 (CYP2D6)                                                       | > 100 $\mu$ M                                                             | 8, 9 |
| 48  | schischkiniin                                             | antioxidant (DPPH assay)<br>brine shrimp toxicity                                          | $3.8 \times 10^{-3}$ mg/mL<br>LD <sub>50</sub> $7.2 \times 10^{-3}$ mg/mL | 25   |
| 144 | $\beta$ -truxilloyl 6-O- $\beta$ -D-glucopyranose diester | scavenge DPPH radical<br>scavenge ABTS radical cation                                      | 66.9%<br>79.3%                                                            | 100  |
| 152 | geniculatin                                               | free radical scavenging activity                                                           | $0.738 \pm 0.009$ mM                                                      | 107  |
| 53  | orthoscuticelline A                                       | antimalarial activity against the chloroquine-sensitive 3D7 strain of <i>P. falciparum</i> | 10.0 $\mu$ M                                                              | 30   |
| 54  | orthoscuticelline B                                       | antimalarial activity against the chloroquine-sensitive 3D7 strain of <i>P. falciparum</i> | > 40.0 $\mu$ M                                                            | 30   |
| 101 | aphadilactone E                                           | antimalarial activity against the chloroquine-sensitive Dd2 strain of <i>P. falciparum</i> | $1.03 \pm 0.13$ $\mu$ M                                                   | 61   |
| 102 | aphadilactone F                                           | antimalarial activity against the chloroquine-sensitive Dd2 strain of <i>P. falciparum</i> | $2.86 \pm 0.47$ $\mu$ M                                                   | 61   |
| 103 | aphadilactone G                                           | antimalarial activity against the chloroquine-sensitive Dd2 strain of <i>P. falciparum</i> | $\sim 20$ $\mu$ M                                                         | 61   |
| 180 | velutinindimer A                                          | antimalarial activity against <i>Plasmodium falciparum</i>                                 | 6.4 $\mu$ M                                                               | 114  |
| 189 | velutinindimer B                                          | antimalarial activity against <i>Plasmodium falciparum</i>                                 | 5.4 $\mu$ M                                                               | 114  |
| 190 | velutinindimer C                                          | antimalarial activity against <i>Plasmodium falciparum</i>                                 | 5.8 $\mu$ M                                                               | 114  |
| 284 | bielschowskysin                                           | antimalarial activity against <i>Plasmodium falciparum</i>                                 | 10 $\mu$ g/mL                                                             | 173  |
| 100 | crotoeurin A                                              | neurite outgrowth-promoting activity on NGF-mediated PC12 cells                            | 9.72%                                                                     | 60   |
| 107 | scopariusic acid                                          | immuno-suppressive activity                                                                | 2.6 $\mu$ M                                                               | 63   |
| 108 | scopariusicide A                                          | inhibition on T cell proliferation                                                         | 20.7 $\mu$ M                                                              | 63   |
| 110 | scopariusicide C                                          | inhibition on T cell proliferation<br>inhibition on B cell proliferation                   | 18.4 $\mu$ M<br>23.5 $\mu$ M                                              | 64   |

|            |                            |                                                                                                   |                                             |     |
|------------|----------------------------|---------------------------------------------------------------------------------------------------|---------------------------------------------|-----|
| <b>111</b> | isoscopariusin A           | inhibition on ConA-induced T cell proliferation<br>inhibition on LPS-induced B cell proliferation | 0.68 $\mu$ M<br>13.81 $\mu$ M               | 65  |
| <b>112</b> | biyouyanagin A             | anti-HIV activity                                                                                 | EC <sub>50</sub> 0.798 $\mu$ g/mL           | 66  |
| <b>244</b> | rhododaurichromanic acid A | anti-HIV activity                                                                                 | EC <sub>50</sub> 0.37 $\mu$ g/mL<br>TI 91.9 | 147 |
| <b>245</b> | rhododaurichromanic acid B | anti-HIV activity                                                                                 | NI <sup>a</sup>                             | 147 |
| <b>68</b>  | paufferol A                | against human topoisomerase II                                                                    | 2.1 $\mu$ M                                 | 39  |
| <b>122</b> | endiandrin A               | glucocorticoid receptor (GR) binding assay                                                        | 0.9 $\mu$ M                                 | 80  |
| <b>181</b> | achyrodimer F              | inhibition against Tdp1                                                                           | 0.1 $\mu$ M                                 | 115 |
| <b>206</b> | sinaspirolide              | competitive binding activities to 5-HT <sub>7</sub> receptors                                     | 24.0 $\pm$ 6%                               | 129 |
| <b>223</b> | simmonoside A              | COX-2 inhibition                                                                                  | 13.5 $\mu$ M                                | 140 |
| <b>224</b> | simmonoside B              | COX-2 inhibition                                                                                  | 11.4 $\mu$ M                                | 140 |
| <b>230</b> | euodenine A                | TLR receptor activity                                                                             | 4.0 $\mu$ M                                 | 141 |
| <b>269</b> | heliosterpenoid A          | Inhibition of P-glycoprotein in MCF-7/ADR                                                         | 1.28 $\mu$ M                                | 164 |
| <b>270</b> | heliosterpenoid B          | Inhibition of P-glycoprotein in MCF-7/ADR                                                         | 1.02 $\mu$ M                                | 164 |
| <b>306</b> | littoralisone              | NGF-mediated neurite outgrowth of PC12D cells                                                     | enhancing activity 30%                      | 189 |

<sup>a</sup> NI = no inhibition

### 3. References

1. R. B. Filho, M. P. De Souza and M. E. O. Mattos, *Phytochemistry*, 1981, **20**, 345–346.
2. K. Zhang, C. X. Chen, D. Z. Wang and Y. Wu, *Acta Botanica Yunnanica*, 1996, **18**, 353–355.
3. R. L. Sharma, M. Kumari, N. Kumar and A. Prabhakar, *Fitoterapia*, 1999, **70**, 144–147.
4. F. P. Lee, Y. C. Chen, J. J. Chen, I. L. Tsai and I. S. Chen, *Helv. Chim. Acta*, 2004, **87**, 463–468.
5. I. L. Tsai, F. P. Lee, C. C. Wu, C. Y. Duh, T. Ishikawa, J. J. Chen, Y. C. Chen, H. Seki and I. S. Chen, *Planta Med.*, 2005, **71**, 535–542.
6. W. R. Gutekunst and P. S. Baran, *J. Am. Chem. Soc.*, 2011, **133**, 19076–19079.
7. Y. Fujiwara, K. Naithou, T. Miyazaki, K. Hashimoto, K. Mori and Y. Yamamoto, *Tetrahedron Lett.*, 2001, **42**, 2497–2499.
8. Subehan, T. Usia, S. Kadota and Y. Tezuka, *Planta Med.*, 2006, **72**, 527–532.
9. Subehan, T. Usia, S. Kadota and Y. Tezuka, *Nat. Prod. Commun.*, 2006, **1**, 1–7.
10. S. Tsukamoto, B.-C. Cha and T. Ohta, *Tetrahedron*, 2002, **58**, 1667–1671.
11. M. Takahashi, M. Ichikawa, S. Aoyagi and C. Kibayashi, *Tetrahedron Lett.*, 2005, **46**, 57–59.
12. S. Tsukamoto, K. Tomise, K. Miyakawa, B.-C. Cha, T. Abe, T. Hamada, H. Hirota and T. Ohta, *Biorg. Med. Chem.*, 2002, **10**, 2981–2985.
13. K. Wei, W. Li, K. Koike, Y. J. Chen and T. Nikaido, *J. Org. Chem.*, 2005, **70**, 1164–1176.
14. H. Y. Pei, L. L. Xue, M. H. Tang, H. Tang, S. Kuang, L. Wang, X. Ma, X. Y. Cai, Y. Li, M. Zhao, A. H. Peng, H. Y. Ye and L. J. Chen, *J. Agric. Food. Chem.*, 2020, **68**, 2406–2417.
15. H. Matsuda, K. Ninomiya, T. Morikawa, D. Yasuda, I. Yamaguchi and M. Yoshikawa, *Biorg. Med. Chem.*, 2009, **17**, 7313–7323.
16. R. Muharini, Z. Liu, W. Lin and P. Proksch, *Tetrahedron Lett.*, 2015, **56**, 2521–2525.
17. X. J. Yuan, L. Lin, X. Q. Zhang and S. D. Deng, *Phytochem. Lett.*, 2014, **7**, 137–142.
18. X. J. Yuan, Y. D. Liu, H. Zhao, L. J. Men, C. M. He, Y. Qiu, Q. Q. Yu, K. P. Li, L. K. Qi and D. L. Chen, *Phytochemistry*, 2021, **181**, 112572.
19. R. Hartmann, A. San-Martin, O. Muñoz and E. Breitmaier, *Angew. Chem., Int. Ed. Engl.*, 1990, **29**, 385–386.
20. S. Cretton, T. A. Bartholomeusz, M. Humam, L. Marcourt, Y. Allenbach, D. Jeannerat, O. Muñoz and P. Christen, *J. Nat. Prod.*, 2011, **74**, 2388–2394.
21. R. Atta ur, K. F. Khattak, F. Nighat, M. Shabbir, K. D. Hemalal and L. M. Tillekeratne, *Phytochemistry*, 1998, **48**, 377–383.
22. C. A. Geng, X. Y. Huang, Y. B. Ma, B. Hou, T. Z. Li, X. M. Zhang and J. J. Chen, *J. Nat. Prod.*, 2017, **80**, 959–964.
23. R. L. Cai, H. M. Jiang, Z. Xiao, W. H. Cao, T. Yan, Z. M. Liu, S. e. Lin, Y. H. Long and Z. G. She, *Org. Lett.*, 2019, **21**, 9633–9636.
24. M. S. C. Pedras, Q.-A. Zheng, G. Schatte and A. M. Adio, *Phytochemistry*, 2009, **70**, 2010–2016.
25. M. Shoeb, S. Celik, M. Jaspars, Y. Kumarasamy, S. M. MacManus, L. Nahar, P. K. Thoo-Lin and S. D. Sarker, *Tetrahedron*, 2005, **61**, 9001–9006.
26. A. N. Pearce, E. W. Chia, M. V. Berridge, E. W. Maas, M. J. Page, J. L. Harper, V. L. Webb and B. R. Copp, *Tetrahedron*, 2008, **64**, 5748–5755.

27. G. Delle Monache, B. Botta, F. Delle Monache, R. Espinal, S. C. De Bonnevaux, C. De Luca, M. Botta, F. Corelli, D. Dei, E. Gacs-Baitz and M. Carmignani, *Bioorg. Med. Chem. Lett.*, 1996, **6**, 233–238.
28. B. X. Zhao, Y. Wang, C. Li, G. C. Wang, X. J. Huang, C. L. Fan, Q. M. Li, H. J. Zhu, W. M. Chen and W. C. Ye, *Tetrahedron Lett.*, 2013, **54**, 4708–4711.
29. W. H. Jiao, H. Gao, C. Y. Li, F. Zhao, R. W. Jiang, Y. Wang, G. X. Zhou and X. S. Yao, *J. Nat. Prod.*, 2010, **73**, 167–171.
30. G. Kleks, S. Duffy, L. Lucantoni, V. M. Avery and A. R. Carroll, *J. Nat. Prod.*, 2020, **83**, 422–428.
31. A. A. Q. Al-Khdhairawi, P. Krishnan, C. W. Mai, F. F. L. Chung, C. O. Leong, K. T. Yong, K. W. Chong, Y. Y. Low, T. S. Kam and K. H. Lim, *J. Nat. Prod.*, 2017, **80**, 2734–2740.
32. J. Muñoz and M. Köck, *J. Nat. Prod.*, 2016, **79**, 434–437.
33. Y. T. Sun, B. Lin, S. G. Li, M. Liu, Y. J. Zhou, Y. Xu, H. M. Hua and H. W. Lin, *Tetrahedron*, 2017, **73**, 2786–2792.
34. W. L. Wang, Y. Z. Tang, Y. X. Liu, L. Yuan, J. Wang, B. Lin, D. Zhou, L. Sun, R. B. Huang, G. Chen and N. Li, *Org. Chem. Front.*, 2019, **6**, 2850–2859.
35. V. Seidel, F. Bailleul and P. G. Waterman, *Phytochemistry*, 2000, **55**, 439–446.
36. D. R. Katerere, A. I. Gray, A. R. Kennedy, R. J. Nash and R. D. Waigh, *Phytochemistry*, 2004, **65**, 433–438.
37. X. J. Zhang, L. Y. Li, S. S. Wang, S. Que, W. Z. Yang, F. Y. Zhang, N. B. Gong, W. Cheng, H. Liang, M. Ye, Y. X. Jia and Q. Y. Zhang, *Tetrahedron*, 2013, **69**, 11074–11079.
38. Y. Liu, X. J. Zhang, N. Kelsang, G. Z. Tu, D. X. Kong, J. H. Lu, Y. T. Zhang, H. Liang, P. F. Tu and Q. Y. Zhang, *J. Nat. Prod.*, 2018, **81**, 307–315.
39. H. Nozaki, K.-i. Hayashi, M. Kido, K. Kakumoto, S. Ikeda, N. Matsuura, H. Tani, D. Takaoka, M. Inuma and Y. Akao, *Tetrahedron Lett.*, 2007, **48**, 8290–8292.
40. I. S. Aljančić, I. Vučković, M. Jadranin, M. Pešić, I. Đorđević, A. Podolski-Renić, S. Stojković, N. Menković, V. E. Vajs and S. M. Milosavljević, *Phytochemistry*, 2014, **98**, 190–196.
41. C. Kamperdick, N. M. Phuong, T. Van Sung and G. Adam, *Phytochemistry*, 2001, **56**, 335–340.
42. Q. Q. Xu, C. Zhang, Y. L. Zhang, J. L. Lei, L. Y. Kong and J. G. Luo, *Bioorg. Chem.*, 2021, **108**, 104646.
43. Y. G. Guo, Y. G. Xie, G. J. Wu, T. F. Cheng, S. L. Zhu, S. K. Yan, H. Z. Jin and W. D. Zhang, *ACS Omega*, 2019, **4**, 2047–2052.
44. Y. L. Zhang, X. W. Zhou, X. B. Wang, L. Wu, M. H. Yang, J. Luo, Y. Yin, J. G. Luo and L. Y. Kong, *Org. Lett.*, 2017, **19**, 3013–3016.
45. A. Mallabaev, B. Tashkhodzhaev, I. M. Saitbaeva, M. R. Yagudaev and G. P. Sidyakin, *Chem. Nat. Compd.*, 1986, **22**, 42–48.
46. X. D. Zhou, X. Y. Chai, K. W. Zeng, M. B. Zhao, Y. Jiang and P. F. Tu, *Tetrahedron Lett.*, 2015, **56**, 1141–1143.
47. H. L. Huang, Y. J. Xu, H. L. Liu, X. Q. Liu, J. N. Shang, G. T. Han, M. J. Yao and C. S. Yuan, *Phytochemistry*, 2011, **72**, 514–517.
48. Y. Takeda, H. Yamashita, T. Matsumoto and H. Terao, *Phytochemistry*, 1993, **33**, 713–715.
49. H. Okamura, T. Iwagawa and M. Nakatani, *Bull. Chem. Soc. Jpn.*, 1995, **68**, 3465–3467.
50. S. Qian and G. Zhao, *Chem. Commun.*, 2012, **48**, 3530–3532.
51. C. P. Shen, J. G. Luo, M. H. Yang and L. Y. Kong, *Phytochemistry*, 2017, **137**, 117–122.

52. D. Y. Zhang, X. X. Wang, Y. N. Wang, M. Wang, P. Y. Zhuang, Y. Jin and H. Liu, *Org. Chem. Front.*, 2021, **8**, 4374–4386.
53. J. Q. Liu, J. C. Shu, R. Zhang and W. Zhang, *Fitoterapia*, 2011, **82**, 1181–1184.
54. C. Zhang, S. Wang, K. W. Zeng, J. Li, D. Ferreira, J. K. Zjawiony, B. Y. Liu, X. Y. Guo, H. W. Jin, Y. Jiang and P. F. Tu, *J. Nat. Prod.*, 2016, **79**, 213–223.
55. Plants of the World Online, <http://www.plantsoftheworldonline.org/>, (accessed April 2022).
56. S. Xiaoyu, A. Isogai, K. Furihata, S. Handong and A. Suzuki, *Phytochemistry*, 1994, **35**, 725–729.
57. L. B. Yang, J. Yang, L. M. Li, C. Lei, Y. Zhao, S. X. Huang, W. L. Xiao, Q. B. Han, J. X. Pu and H. D. Sun, *Tetrahedron Lett.*, 2008, **49**, 3574–3577.
58. H. C. Liu, Z. B. Xiang, Q. Wang, B. Y. Li, Y. S. Jin and H. S. Chen, *Fitoterapia*, 2017, **118**, 94–100.
59. J. H. Yang, W. G. Wang, X. Du, F. He, H. B. Zhang, X. N. Li, Y. Li, J. X. Pu and H. D. Sun, *J. Nat. Prod.*, 2014, **77**, 2444–2453.
60. Z. H. Pan, D. S. Ning, X. D. Wu, S. S. Huang, D. P. Li and S. H. Lv, *Bioorg. Med. Chem. Lett.*, 2015, **25**, 1329–1332.
61. H. Zhang, J. Liu, L. S. Gan, S. Dalal, M. B. Cassera and J. M. Yue, *Org. Biomol. Chem.*, 2016, **14**, 957–962.
62. K. H. Lin, Y. C. Lin, C. Y. Huang, Y. J. Tseng, S. R. Chen, Y. B. Cheng, T. L. Hwang, S. Y. Wang, H. Y. Chen, C. F. Dai and J. H. Sheu, *Bull. Chem. Soc. Jpn.*, 2021, **94**, 2774–2783.
63. B. Zhen, X. Y. Suo, J. Dang, H. L. Yue, Y. D. Tao, J. J. Wang, L. Li, M. B. Lin, Q. Hou, W. P. Wang, X. L. Wang, J. D. Jiang and T. F. Ji, *Chin. Chem. Lett.*, 2021, **32**, 2338–2341.
64. S. P. Chen, K. Hu, X. R. Li, L. Zhang, H. D. Sun and P. T. Puno, *Tetrahedron Lett.*, 2021, **73**, 153133.
65. B. C. Yan, M. Zhou, J. Li, X. N. Li, S. J. He, J. P. Zuo, H. D. Sun, A. Li and P. T. Puno, *Angew. Chem. Int. Ed.*, 2021, **60**, 12859–12867.
66. N. Tanaka, M. Okasaka, Y. Ishimaru, Y. Takaishi, M. Sato, M. Okamoto, T. Oshikawa, S. U. Ahmed, L. M. Consentino and K.-H. Lee, *Org. Lett.*, 2005, **7**, 2997–2999.
67. K. C. Nicolaou, D. Sarlah and D. M. Shaw, *Angew. Chem. Int. Ed.*, 2007, **46**, 4708–4711.
68. K. C. Nicolaou, T. R. Wu, D. Sarlah, D. M. Shaw, E. Rowcliffe and D. R. Burton, *J. Am. Chem. Soc.*, 2008, **130**, 11114–11121.
69. N. Tanaka, Y. Kashiwada, S. Y. Kim, W. Hashida, M. Sekiya, Y. Ikeshiro and Y. Takaishi, *J. Nat. Prod.*, 2009, **72**, 1447–1452.
70. K. C. Nicolaou, S. Sanchini, T. R. Wu and D. Sarlah, *Chem. Eur. J.*, 2010, **16**, 7678–7682.
71. Y. Iwase, M. Takahashi, T. Tada, Y. Takemura, M. Ju-Ichi, C. Ito, H. Furukawa, T. Hashimoto, S. Takaoka and Y. Asakawa, *Heterocycles*, 2000, **53**, 441–446.
72. H. P. He, S. T. Chen, Y. M. Shen, C. X. Chen, Y. B. Zhao and X. J. Hao, *Chin. Chem. Lett.*, 2003, **14**, 1150–1153.
73. H. P. He, Y. M. Shen, S. T. Chen, Y. N. He and X. J. Hao, *Helv. Chim. Acta*, 2006, **89**, 2836–2840.
74. S. Q. Wang, X. Li, X. N. Wang, N. N. Wei and H. X. Lou, *Phytochem. Lett.*, 2011, **4**, 97–100.
75. S. Yamamura, M. Niwa, M. Nonoyama and Y. Terada, *Tetrahedron Lett.*, 1978, **19**, 4891–4894.
76. T. Kikuchi, S. Kadota, K. Yanada, K. Tanaka, K. Watanabe, M. Yoshizaki, T. Yokoi and T. Shingu, *Chem. Pharm. Bull.*, 1983, **31**, 1112–1114.
77. R. N. Mahindru, S. C. Taneja, K. L. Dhar and R. T. Brown, *Phytochemistry*, 1993, **32**, 1073–1075.

78. S. Malhotra, S. K. Koul, S. C. Taneja, P. Pushpangadan and K. L. Dhar, *Phytochemistry*, 1990, **29**, 2733–2734.
79. N. M. Cuong, W. C. Taylor and T. V. Sung, *Nat. Prod. Lett.*, 2001, **15**, 331–338.
80. R. A. Davis, A. R. Carroll, S. Duffy, V. M. Avery, G. P. Guymer, P. I. Forster and R. J. Quinn, *J. Nat. Prod.*, 2007, **70**, 1118–1121.
81. R. A. Davis, E. C. Barnes, J. Longden, V. M. Avery and P. C. Healy, *Biorg. Med. Chem.*, 2009, **17**, 1387–1392.
82. Q. Wang, C. Terreaux, A. Marston, R. X. Tan and K. Hostettmann, *Phytochemistry*, 2000, **54**, 909–912.
83. S. Tachibana, K. Ohkubo and G. H. N. Towers, *Phytochemistry*, 1992, **31**, 81–83.
84. Y. S. Wang, B. T. Li, S. X. Liu, Z. Q. Wen, J. H. Yang, H. B. Zhang and X. J. Hao, *J. Nat. Prod.*, 2017, **80**, 798–804.
85. Y. F. Xi, S. F. Liu, W. Hong, X. Y. Song, L. L. Lou, L. Zhou, G. D. Yao, B. Lin, X. B. Wang, X. X. Huang and S. J. Song, *Bioorg. Chem.*, 2019, **88**, 102926.
86. Y. Z. Li, A. P. Tong and J. Huang, *Chem. Biodiversity*, 2012, **9**, 769–776.
87. B. T. Ngadjui, D. Lontsi, J. F. Ayafor and B. L. Sondengam, *Phytochemistry*, 1989, **28**, 231–234.
88. J. J. Tan, C. H. Tan, Y. Q. Wang, S. H. Jiang and D. Y. Zhu, *Helv. Chim. Acta*, 2006, **89**, 117–121.
89. K.-i. Nakashima, M. Oyama, T. Ito, Y. Akao, J. R. Witono, D. Darnaedi, T. Tanaka, J. Murata and M. Iinuma, *Tetrahedron*, 2012, **68**, 2421–2428.
90. H. Koshino, S.-I. Terada, T. Yoshihara, S. Sakamura, T. Shimanuki, T. Sato and A. Tajimi, *Phytochemistry*, 1988, **27**, 1333–1338.
91. Y. Lu and L. Y. Foo, *Phytochemistry*, 1999, **51**, 91–94.
92. H. Katsui, S. Sugimoto, K. Matsunami, H. Otsuka and S. Lhieochaiphant, *Chem. Pharm. Bull.*, 2017, **65**, 97–101.
93. Y. Asakawa, *Phytochemistry*, 2004, **65**, 623–669.
94. H. Sudo, T. Ide, H. Otsuka, E. Hirata, A. Takushi, T. Shinzato and Y. Takeda, *Chem. Pharm. Bull.*, 2000, **48**, 542–546.
95. Y. M. Chi, W. M. Yan and J. S. Li, *Phytochemistry*, 1990, **29**, 2376–2378.
96. Y. M. Chi, F. Hashimoto, W. M. Yan and T. Nohara, *Phytochemistry*, 1997, **46**, 763–769.
97. K. Watanabe, T. Kubota, T. Shinzato, J. Ito, Y. Mikami and J. i. Kobayashi, *Tetrahedron Lett.*, 2007, **48**, 7502–7504.
98. P. Zhao, T. Tanaka, K. Hirabayashi, Y. J. Zhang, C. R. Yang and I. Kouno, *Phytochemistry*, 2008, **69**, 3087–3094.
99. M. Kumar, P. Rawat, N. Rahuja, A. K. Srivastava and R. Maurya, *Phytochemistry*, 2009, **70**, 1448–1455.
100. B. D’Abrosca, A. Fiorentino, A. Ricci, M. Scognamiglio, S. Pacifico, S. Piccolella and P. Monaco, *Phytochem. Lett.*, 2010, **3**, 38–44.
101. S. Liang, S. X. Liu, H. Z. Jin, L. Shan, S. C. Yu, Y. H. Shen, H. L. Li, Q. Y. Wu, Q. Y. Sun and W. D. Zhang, *Chem. Commun.*, 2013, **49**, 6968–6970.
102. X. P. Zhang, C. Y. Chen, Y. H. Li, D. L. Chen, L. Dong, W. Na, C. M. Wu, J. Q. Zhang and Y. B. Li, *J. Nat. Prod.*, 2016, **79**, 1249–1258.
103. M. A. El-Ansari, M. A. Nawwar and N. A. M. Saleh, *Phytochemistry*, 1995, **40**, 1543–1548.
104. J. H. Isaza M, H. Ito and T. Yoshida, *Chem. Pharm. Bull.*, 1999, **47**, 1510–1511.
105. J. H. Isaza, H. Ito and T. Yoshida, *Phytochemistry*, 2001, **58**, 321–327.
106. J. F. Xu, X. P. Zheng, W. D. Liu, R. F. Du, L. F. Bi and P. C. Zhang, *J. Asian Nat. Prod. Res.*, 2010, **12**, 529–534.



107. F. Pereira do Amaral, A. Napolitano, M. Masullo, L. Campaner dos Santos, M. Festa, W. Vilegas, C. Pizza and S. Piacente, *J. Nat. Prod.*, 2012, **75**, 547–556.
108. G. L. Ma, J. Xiong, G. X. Yang, L. L. Pan, C. L. Hu, W. Wang, H. Fan, Q. H. Zhao, H. Y. Zhang and J. F. Hu, *J. Nat. Prod.*, 2016, **79**, 1354–1364.
109. X. Liu, J. Fu, X. J. Yao, J. Yang, L. Liu, T. G. Xie, P. C. Jiang, Z. H. Jiang and G. Y. Zhu, *J. Nat. Prod.*, 2018, **81**, 1333–1342.
110. J. Li, L. H. Tan, H. Zou, Z. X. Zou, H. P. Long, W. X. Wang, P. S. Xu, L. F. Liu, K. P. Xu and G. S. Tan, *J. Nat. Prod.*, 2020, **83**, 216–222.
111. X. Y. Chai, Y. L. Song, Z. R. Xu, H. M. Shi, C. C. Bai, D. Bi, J. Wen, F. F. Li and P. F. Tu, *J. Nat. Prod.*, 2008, **71**, 814–819.
112. T. Sagawa, Y. Takaishi, Y. Fujimoto, C. Duque, C. Osorio, F. Ramos, C. Garzon, M. Sato, M. Okamoto, T. Oshikawa and S. U. Ahmed, *J. Nat. Prod.*, 2005, **68**, 502–505.
113. Y. Yuan, J. X. Yang, L. H. Nie, B. L. Li, X. B. Qin, J. W. Wu and S. X. Qiu, *J. Asian Nat. Prod. Res.*, 2018, **20**, 837–843.
114. N. Wongsas, K. Kanokmedhakul, J. Boonmak, S. Youngme and S. Kanokmedhakul, *RSC Adv.*, 2017, **7**, 25285–25297.
115. L. W. Tian, Y. J. Feng, T. D. Tran, Y. Shimizu, T. Pfeifer, H. T. Vu and R. J. Quinn, *Bioorg. Med. Chem. Lett.*, 2017, **27**, 4007–4010.
116. C. S. Yang, X. B. Wang, J. S. Wang, J. G. Luo, J. Luo and L. Y. Kong, *Org. Lett.*, 2011, **13**, 3380–3383.
117. J. L. Song, B. L. Li, Y. Yuan, L. H. Nie, J. Niu, D. Chiu, Z. F. Xu, J. W. Wu and S. X. Qiu, *Nat. Prod. Res.*, 2017, **31**, 2459–2466.
118. C. M. A. d. M. Rezende, M. V. von Bülow, O. R. Gottlieb, S. L. V. Pinho and A. I. da Rocha, *Phytochemistry*, 1971, **10**, 3167–3172.
119. Y. P. Mascarenhas and O. R. Gottlieb, *Phytochemistry*, 1977, **16**, 301–302.
120. M. Kuroyanagi, Y. Yamamoto, S. Fukushima, A. Ueno, T. Noro and T. Miyase, *Chem. Pharm. Bull.*, 1982, **30**, 1602–1608.
121. J. X. Yang, *Chem. Nat. Compd.*, 2019, **55**, 606–609.
122. Y. Nishidono, R. Okada, Y. Iwama, T. Okuyama, M. Nishizawa and K. Tanaka, *Fitoterapia*, 2020, **140**, 104444.
123. L. B. Zhang, J. L. Lv and J. W. Liu, *J. Nat. Prod.*, 2016, **79**, 1857–1861.
124. J. Zou, G. D. Chen, H. Zhao, Y. Huang, X. Luo, W. Xu, R. R. He, D. Hu, X. S. Yao and H. Gao, *Org. Lett.*, 2018, **20**, 884–887.
125. J. Zou, G. D. Chen, H. Zhao, X. X. Wang, Z. J. Zhang, Y.-B. Qu, R. R. He, K. F. So, X. S. Yao and H. Gao, *Chem. Commun.*, 2019, **55**, 6221–6224.
126. K. Franke and L. Wessjohann, *Journal of Chemistry*, 2005, **43**, 749–752.
127. S. K. Banerjee, B. D. Gupta, W. S. Sheldrick and G. Höfle, *Liebigs Ann. Chem.*, 1984, 888–893.
128. L. Yi, P. Li and Z. M. Bi, *Chin. Chem. Lett.*, 2006, **17**, 1579–1581.
129. S. X. Deng, S. N. Chen, P. Yao, D. J. Nikolic, R. B. van Breemen, J. L. Bolton, H. H. S. Fong, N. R. Farnsworth and G. F. Pauli, *J. Nat. Prod.*, 2006, **69**, 536–541.
130. Q. C. Chen, J. P. Lee, W. Y. Jin, U. J. Youn, H. J. Kim, I. S. Lee, X. F. Zhang, K. S. Song, Y. H. Seong and K. H. Bae, *Arch. Pharmacol. Res.*, 2007, **30**, 565–569.
131. X. N. Li, Y. Y. Chen, D. P. Cheng, S. Q. Tong, H. B. Qu and J. Z. Yan, *Nat. Prod. Res.*, 2012, **26**, 1782–1786.
132. T. Uto, N. H. Tung, R. Taniyama, T. Miyanowaki, O. Morinaga and Y. Shoyama, *Phytother. Res.*, 2015, **29**, 1956–1963.
133. W. X. Gong, Y. Z. Zhou, X. Li, X. X. Gao, J. S. Tian, X. M. Qin and G. H. Du, *Molecules*, 2016, **21**, 549–559.
134. W. D. Li, Y. Wu, X. D. Liu, C. P. Yan, D. Liu, Y. Pan, G. M. Yang, F. Z. Yin, Z. B. Weng, D. Zhao, Z. P. Chen and B. C. Cai, *Molecules*, 2013, **18**, 520–534.

135. L. Z. Lin, X. G. He, L. Z. Lian, W. King and J. Elliott, *J. Chromatogr. A*, 1998, **810**, 71–79.
136. K. Xiao, L. J. Xuan, Y. M. Xu, D. L. Bai, D. X. Zhong, H. M. Wu, Z. H. Wang and N. X. Zhang, *Eur. J. Org. Chem.*, 2002, **2002**, 564–568.
137. S. G. Li, X. J. Huang, M. M. Li, Q. Liu, H. Liu, Y. Wang and W. C. Ye, *J. Nat. Prod.*, 2018, **81**, 254–263.
138. N. L. Zhang, X. C. Shen, X. F. Jiang, J. Z. Cai, X. L. Shen, Y. J. Hu and S. X. Qiu, *J. Nat. Med.*, 2018, **72**, 304–309.
139. X. L. Li, B. X. Zhao, X. J. Huang, D. M. Zhang, R. W. Jiang, Y. J. Li, Y. Q. Jian, Y. Wang, Y. L. Li and W. C. Ye, *Org. Lett.*, 2014, **16**, 224–227.
140. W. M. Abdel-Mageed, S. A. L. Bayoumi, L. H. Al-wahaibi, L. Li, H. M. Sayed, M. S. A. Abdelkader, A. A. El-Gamal, M. Liu, J. Y. Zhang, L. X. Zhang and X. T. Liu, *Org. Lett.*, 2016, **18**, 1728–1731.
141. J. E. Neve, H. P. Wijesekera, S. Duffy, I. D. Jenkins, J. A. Ripper, S. J. Teague, M. Campitelli, A. Garavelas, G. Nikolakopoulos, P. V. Le, P. de A. Leone, N. B. Pham, P. Shelton, N. Fraser, A. R. Carroll, V. M. Avery, C. McCrae, N. Williams and R. J. Quinn, *J. Med. Chem.*, 2014, **57**, 1252–1275.
142. S. Ankisetty, S. Nandiraju, H. Win, Y. C. Park, C. D. Amsler, J. B. McClintock, J. A. Baker, T. K. Diyabalanage, A. Pasaribu, M. P. Singh, W. M. Maiese, R. D. Walsh, M. J. Zaworotko and B. J. Baker, *J. Nat. Prod.*, 2004, **67**, 1295–1302.
143. J. D. McCombs, J. W. Blunt, M. V. Chambers, M. H.G. Munro and W. T. Robinson, *Tetrahedron*, 1988, **44**, 1489–1502.
144. F. Cao, Z. H. Meng, P. Wang, D. Q. Luo and H. J. Zhu, *J. Nat. Prod.*, 2020, **83**, 1283–1287.
145. H. L. Long, Z. B. Cheng, W. Huang, Q. Wu, X. D. Li, J. R. Cui, P. Proksch and W. H. Lin, *Org. Lett.*, 2016, **18**, 4678–4681.
146. X. N. Sang, S. F. Chen, G. Chen, X. An, S. G. Li, X. J. Lu, D. Zhao, J. Bai, H. F. Wang and Y. H. Pei, *RSC Adv.*, 2017, **7**, 1943–1946.
147. Y. Kashiwada, K. Yamazaki, Y. Ikeshiro, T. Yamagishi, T. Fujioka, K. Mihashi, K. Mizuki, L. M. Cosentino, K. Fowke, S. L. Morris-Natschke and K.-H. Lee, *Tetrahedron*, 2001, **57**, 1559–1563.
148. N. Iwata and S. Kitanaka, *J. Nat. Prod.*, 2010, **73**, 1203–1206.
149. L. Burchill, A. J. Day, O. Yahiaoui and J. H. George, *Org. Lett.*, 2021, **23**, 578–582.
150. N. Iwata and S. Kitanaka, *Chem. Pharm. Bull.*, 2011, **59**, 1409–1412.
151. Y. X. Yang, J. X. Wang, Q. Wang, H. L. Li, M. Tao, Q. Luo and H. Liu, *Fitoterapia*, 2018, **127**, 396–401.
152. A. Rogachev, N. Komarova, D. Korchagina, M. Dolgikh, I. Sorokina, D. Baev, T. Tolstikova, V. Fomenko and N. Salakhutdinov, *Chem. Sustainable Dev.*, 2008, **1**, 17–22.
153. H. B. Liao, C. Lei, L. X. Gao, J. Y. Li, J. Li and A. J. Hou, *Org. Lett.*, 2015, **17**, 5040–5043.
154. H. B. Liao, G. H. Huang, M. H. Yu, C. Lei and A. J. Hou, *J. Org. Chem.*, 2017, **82**, 1632–1637.
155. G. H. Huang, Z. Hu, C. Lei, P. P. Wang, J. Yang, J. Y. Li, J. Li and A. J. Hou, *J. Nat. Prod.*, 2018, **81**, 1810–1818.
156. G. H. Huang, C. Lei, K. X. Zhu, J. Y. Li, J. Li and A. J. Hou, *Chin. J. Nat. Med.*, 2019, **17**, 963–969.
157. Q. Shi, T. T. Li, Y. M. Wu, X. Y. Sun, C. Lei, J. Y. Li and A. J. Hou, *Phytochemistry*, 2020, **180**, 112524.
158. L. O. Hanuš, S. M. Meyer, E. Muñoz, O. Tagliatalata-Scafati and G. Appendino, *Nat. Prod. Rep.*, 2016, **33**, 1357–1392.

159. T. B. Vree, D. D. Breimer, C. A. M. Van Ginneken and J. N. Van Rossum, *J. Chromatogr.*, 1972, **74**, 124–127.
160. Y. Shoyama, S. Morimoto and I. Nishioka, *Chem. Pharm. Bull.*, 1981, **29**, 3720–3723.
161. F. Korte and H. Sieper, *J. Chromatogr. A*, 1964, **13**, 90–98.
162. Y. Shoyama, R. Oku, T. Yamauchi and I. Nishioka, *Chem. Pharm. Bull.*, 1972, **20**, 1927–1930.
163. M. E. Flores-Giubi, M. J. Durán-Peña, J. M. Botubol-Ares, F. Escobar-Montaño, D. Zorrilla, A. J. Macías-Sánchez and R. Hernández-Galán, *J. Nat. Prod.*, 2017, **80**, 2161–2165.
164. Z. P. Mai, G. Ni, Y. F. Liu, L. Li, G. R. Shi, X. Wang, J. Y. Li and D. Q. Yu, *Sci. Rep.*, 2017, **7**, 4922–4928.
165. W. Haas, H. Sterk and M. Mittelbach, *J. Nat. Prod.*, 2002, **65**, 1434–1440.
166. M. S. Qiu, J. Jin, L. Zhou, W. Zhou, Y. X. Liu, Q. L. Tan, D. Cao and Z. X. Zhao, *Phytochemistry*, 2018, **145**, 103–110.
167. J. C. Zhou, J. Z. Zhang, A. X. Cheng, Y. X. Xiong, L. Liu and H. X. Lou, *Org. Lett.*, 2015, **17**, 3560–3563.
168. F. H. Fang, W. J. Huang, S. Y. Zhou, Z. Z. Han, M. Y. Li, L. F. Liu, X. Z. Wu, X. J. Yao, Y. Li and C. S. Yuan, *Eur. J. Org. Chem.*, 2017, **2017**, 4429–4433.
169. L. F. Liang, T. Kurtán, A. Mándi, L. G. Yao, J. Li, W. Zhang and Y. W. Guo, *Org. Lett.*, 2013, **15**, 274–277.
170. L. L. Sun, W. S. Li, J. Li, H. Y. Zhang, L. G. Yao, H. Luo, Y. W. Guo and X. W. Li, *J. Org. Chem.*, 2021, **86**, 3367–3376.
171. E. Fridkovsky, A. Rudi, Y. Benayahu, Y. Kashman and M. Schleyer, *Tetrahedron Lett.*, 1996, **37**, 6909–6910.
172. M. Zhao, S. M. Cheng, W. P. Yuan, Y. Y. Xi, X. B. Li, J. Y. Dong, K. X. Huang, K. R. Gustafson and P. C. Yan, *Mar. Drugs*, 2016, **14**, 111.
173. J. Marrero, A. D. Rodríguez, P. Baran, R. G. Raptis, J. A. Sánchez, E. Ortega-Barria and T. L. Capson, *Org. Lett.*, 2004, **6**, 1661–1664.
174. M. J. Martín, R. Fernández, A. Francesch, P. Amade, S. S. de Matos-Pita, F. Reyes and C. Cuevas, *Org. Lett.*, 2010, **12**, 912–914.
175. Y. P. Liu, Q. Dai, W. X. Wang, J. He, Z. H. Li, T. Feng and J. K. Liu, *J. Nat. Prod.*, 2020, **83**, 1725–1729.
176. H. Y. Lou, S. Zheng, T. L. Li, J. X. Zhang, Y. Fei, X. J. Hao, G. Y. Liang and W. D. Pan, *Org. Lett.*, 2014, **16**, 2696–2699.
177. H. Y. Lou, L. Jin, T. Huang, D. P. Wang, G. Y. Liang and W. D. Pan, *Tetrahedron Lett.*, 2017, **58**, 401–404.
178. F. W. Ma, H. Y. Lou, Y. H. Ge, J. Y. Li, C. Chen, S. Xu, L. Tang and W. D. Pan, *Anal. Bioanal. Chem.*, 2021, **413**, 6513–6521.
179. N. Fokialakis, P. Magiatis, A. Terzis, F. Tillequin and A.-L. Skaltsounis, *Tetrahedron Lett.*, 2001, **42**, 5323–5325.
180. Z. J. Zhang, C. Wang, X. D. Wu, Y. Huang, W. X. Zhou and Q. S. Zhao, *J. Org. Chem.*, 2019, **84**, 11301–11305.
181. S. P. Kureel, R. S. Kapil and S. P. Popli, *Tetrahedron Lett.*, 1969, **10**, 3857–3862.
182. M. J. Begley, D. G. Clarke, L. Crombie and D. A. Whiting, *J. Chem. Soc. D*, 1970, 1547–1548.
183. T. S. Wu, Y. Y. Chan, M. J. Liou, F. W. Lin, L. S. Shi and K. T. Chen, *Phytother. Res.*, 1998, **12**, S80–S82.
184. K. Matsui and K. Munakata, *Tetrahedron Lett.*, 1976, **17**, 4371–4374.
185. J. Li, M. Tanaka, K. Kurasawa, T. Ikeda and T. Nohara, *Chem. Pharm. Bull.*, 2005, **53**, 235–237.
186. F. Yang, B. J. Su, Y. J. Hu, J. L. Liu, H. Li, Y. Q. Wang, H. B. Liao and D. Liang, *J. Org. Chem.*, 2021, **86**, 5284–5291.

187. P. R. Jefferies and G. K. Worth, *Tetrahedron*, 1973, **29**, 903–908.
188. M. A. Rashid, J. A. Armstrong, A. I. Gray and P. G. Waterman, *Phytochemistry*, 1992, **31**, 3583–3588.
189. Y. S. Li, K. Matsunaga, M. Ishibashi and Y. Ohizumi, *J. Org. Chem.*, 2001, **66**, 2165–2167.
190. A. San Feliciano, M. Medarde, J. M. Miguel del Corral, A. Aramburu, M. Gordaliza and A. F. Barrero, *Tetrahedron Lett.*, 1989, **30**, 2851–2854.
191. M. W. Lodewyk, C. Soldi, P. B. Jones, M. M. Olmstead, J. Rita, J. T. Shaw and D. J. Tantillo, *J. Am. Chem. Soc.*, 2012, **134**, 18550–18553.
192. S. J. Piao, Y. L. Song, W. H. Jiao, F. Yang, X. F. Liu, W. S. Chen, B. N. Han and H. W. Lin, *Org. Lett.*, 2013, **15**, 3526–3529.
193. W. H. Jiao, L. L. Hong, J. B. Sun, S. J. Piao, G. D. Chen, H. Deng, S. P. Wang, F. Yang and H. W. Lin, *Eur. J. Org. Chem.*, 2017, **2017**, 3421–3426.
194. J. H. Ryu, H. Ja Son, S. Hyun Lee and D. Hwan Sohn, *Bioorg. Med. Chem. Lett.*, 2002, **12**, 649–651.
